# Supplementary material for: Más, aún, sobre el tema del "Ciervo del pie blanco" y sus conexiones
Source: publisher site journal article supplement (doi:10.18632/aging.205649), 1986-01-01
Supplement: Supplementary file [file aging-v16i6-205649-supplementary-material-SD1.pdf]

**SUPPLEMENTARY FIGURES**

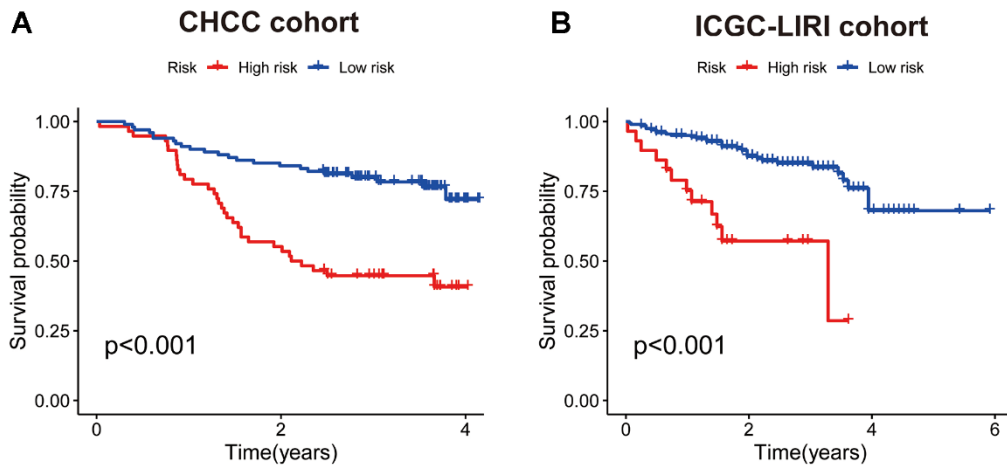

**Supplementary Figure 1. K-M curves for the validation cohorts. (A)** K-M curves for the CHCC cohort. **(B)** K-M curves for the ICGC-LIRI cohort.

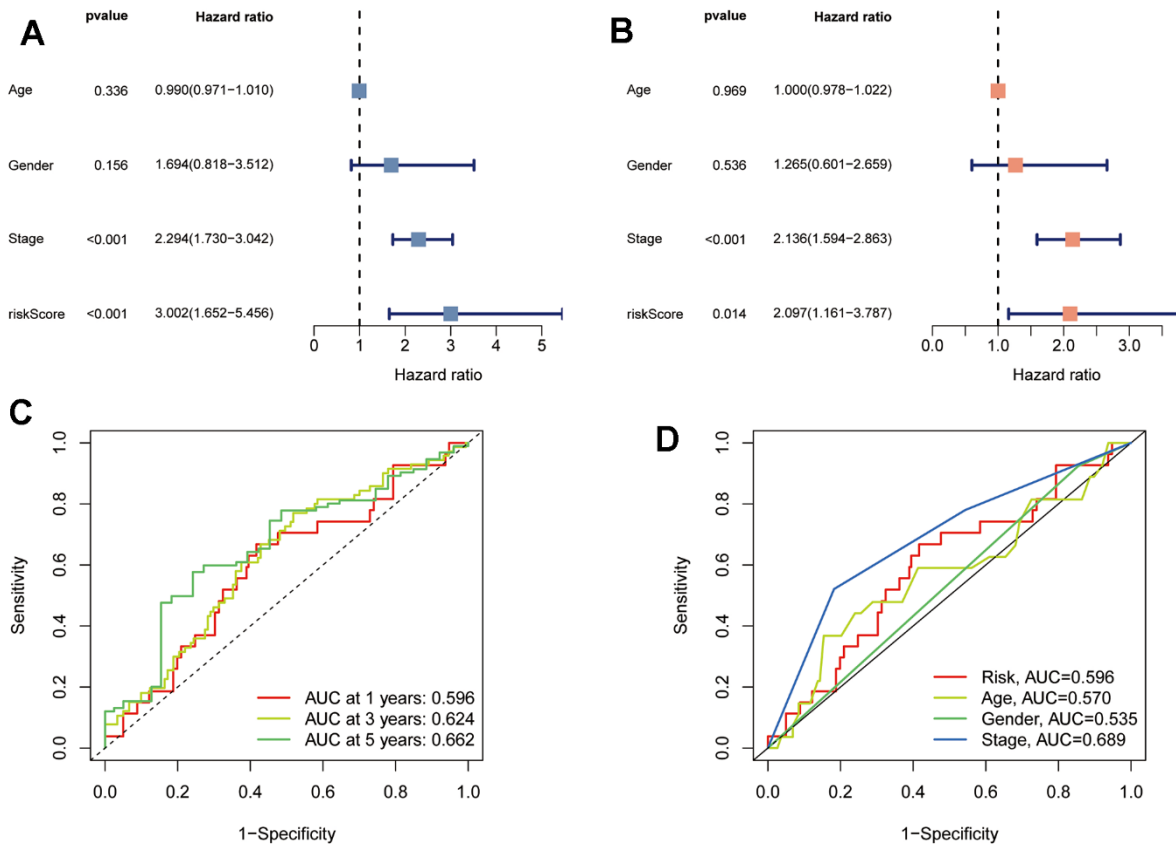

**Supplementary Figure 2. Assessment of TRSSys in HCC. (A, B)** Forest plots for univariate **(A)** and multivariate Cox **(B)** regression analysis in the GSE14520 cohort. **(C)** ROC curves for the TRSSys in the GSE14520. **(D)** Comparison of the TRSSys with clinicopathological parameters in the GSE14520.

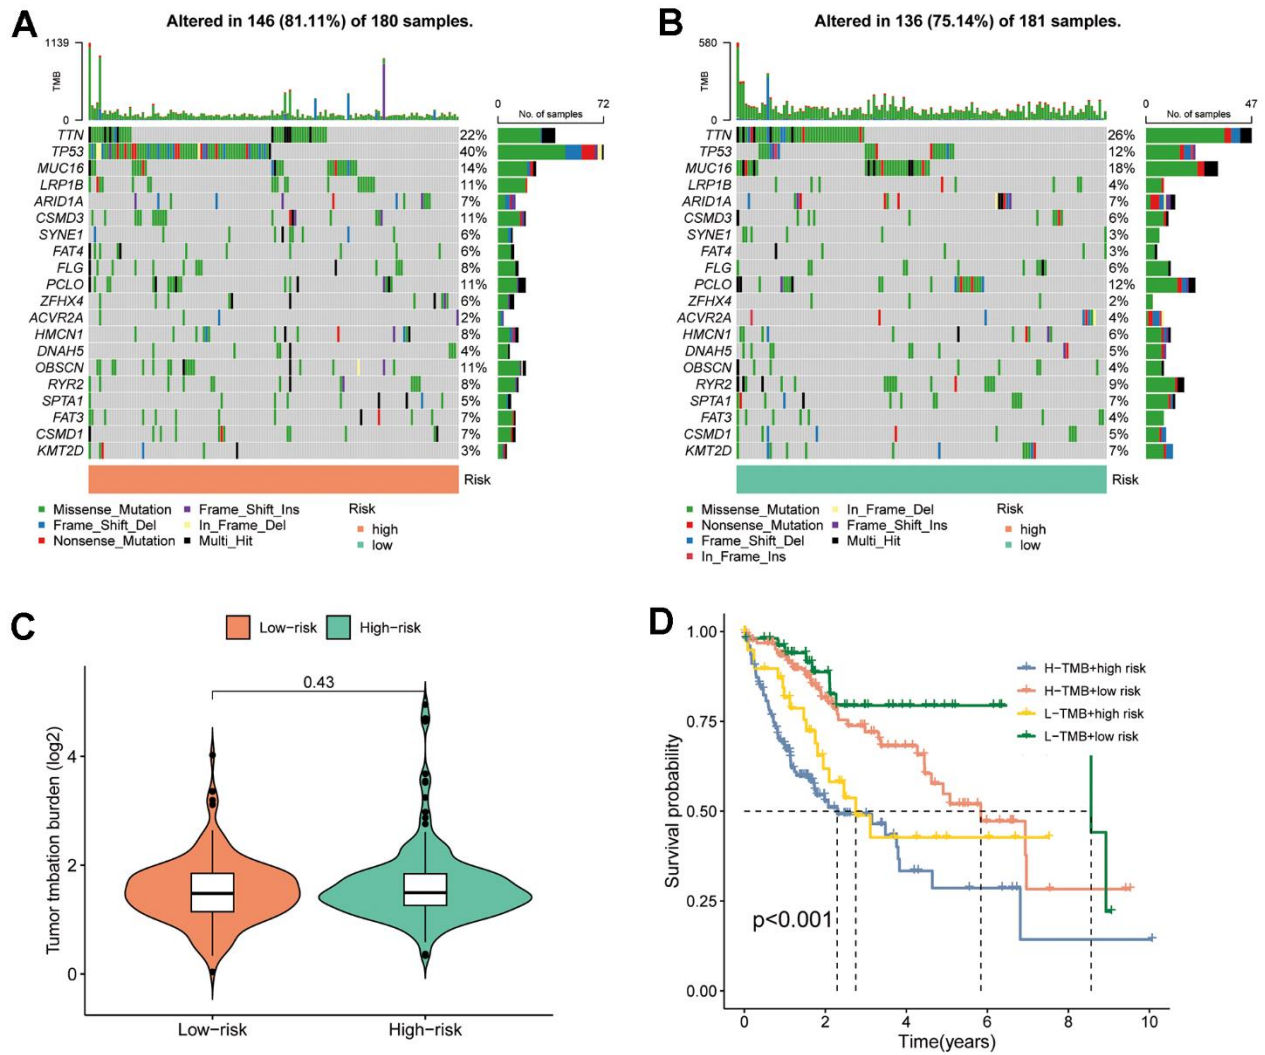

**Supplementary Figure 3. TRSSys-based TMB analysis.** (A, B) The waterfall plots showing mutation information in each tumor sample of different risk groups. (C) TMB level between two risk groups. (D) Kaplan-Meier curves based on the combination of TMB and risk status.
