# Supplementary material for: Más, aún, sobre el tema del "Ciervo del pie blanco" y sus conexiones
Source: publisher site journal article supplement (doi:10.18632/aging.205649), 1986-01-01
Supplement: Supplementary file [file aging-v16i6-205649-supplementary-material-SD2.pdf]

## SUPPLEMENTARY TABLE

**Supplementary Table 1. Immunohistochemical staining images of TRSSys-related genes in HPA (URL link).**

| TRSSys-related genes | Human protein atlas (URL link)                                                                                                                                                                                                                                                                                             |
|----------------------|----------------------------------------------------------------------------------------------------------------------------------------------------------------------------------------------------------------------------------------------------------------------------------------------------------------------------|
| ENO1                 | <a href="https://www.proteinatlas.org/ENSG00000074800-ENO1/tissue/liver">https://www.proteinatlas.org/ENSG00000074800-ENO1/tissue/liver</a><br><a href="https://www.proteinatlas.org/ENSG00000074800-ENO1/pathology/liver+cancer">https://www.proteinatlas.org/ENSG00000074800-ENO1/pathology/liver+cancer</a>             |
| LAPTM4B              | <a href="https://www.proteinatlas.org/ENSG00000104341-LAPTM4B/tissue/liver">https://www.proteinatlas.org/ENSG00000104341-LAPTM4B/tissue/liver</a><br><a href="https://www.proteinatlas.org/ENSG00000104341-LAPTM4B/pathology/liver+cancer">https://www.proteinatlas.org/ENSG00000104341-LAPTM4B/pathology/liver+cancer</a> |
| LGALS3               | <a href="https://www.proteinatlas.org/ENSG00000131981-LGALS3/tissue/liver">https://www.proteinatlas.org/ENSG00000131981-LGALS3/tissue/liver</a><br><a href="https://www.proteinatlas.org/ENSG00000131981-LGALS3/pathology/liver+cancer">https://www.proteinatlas.org/ENSG00000131981-LGALS3/pathology/liver+cancer</a>     |
| PTTG1                | <a href="https://www.proteinatlas.org/ENSG00000164611-PTTG1/tissue/liver">https://www.proteinatlas.org/ENSG00000164611-PTTG1/tissue/liver</a><br><a href="https://www.proteinatlas.org/ENSG00000164611-PTTG1/pathology/liver+cancer">https://www.proteinatlas.org/ENSG00000164611-PTTG1/pathology/liver+cancer</a>         |
| SPP1                 | <a href="https://www.proteinatlas.org/ENSG00000118785-SPP1/tissue/liver">https://www.proteinatlas.org/ENSG00000118785-SPP1/tissue/liver</a><br><a href="https://www.proteinatlas.org/ENSG00000118785-SPP1/pathology/liver+cancer">https://www.proteinatlas.org/ENSG00000118785-SPP1/pathology/liver+cancer</a>             |
| STMN1                | <a href="https://www.proteinatlas.org/ENSG00000117632-STMN1/tissue/liver">https://www.proteinatlas.org/ENSG00000117632-STMN1/tissue/liver</a><br><a href="https://www.proteinatlas.org/ENSG00000117632-STMN1/pathology/liver+cancer">https://www.proteinatlas.org/ENSG00000117632-STMN1/pathology/liver+cancer</a>         |
| TPP1                 | <a href="https://www.proteinatlas.org/ENSG00000166340-TPP1/tissue/liver">https://www.proteinatlas.org/ENSG00000166340-TPP1/tissue/liver</a><br><a href="https://www.proteinatlas.org/ENSG00000166340-TPP1/pathology/liver+cancer">https://www.proteinatlas.org/ENSG00000166340-TPP1/pathology/liver+cancer</a>             |
