# Supplementary material for: Comprehensive assessment of regulatory T-cells-related scoring system for predicting the prognosis, immune microenvironment and therapeutic response in hepatocellular carcinoma
Source: Aging (Albany NY). 2024 Mar 8;16(6):5288–310. doi: 10.18632/aging.205649 (PMC11006487; doi:10.18632/aging.205649)
Supplement: Supplementary Table 2 [file aging-16-205649-s003.xls]

## Sheet: Sheet1
Supplementary Table 2. Tregs-related genes in the Genecards database.
Gene Symbol	Description	Category	Uniprot ID	Gifts	GC Id	Relevance score	GeneCards Link
JAK3	Janus Kinase 3	Protein Coding	P52333	58	GC19M017824	147.306	https://www.genecards.org/cgi-bin/carddisp.pl?gene=JAK3
RAG1	Recombination Activating 1	Protein Coding	P15918	51	GC11P036549	145.339	https://www.genecards.org/cgi-bin/carddisp.pl?gene=RAG1
PIK3CD	Phosphatidylinositol-4,5-Bisphosphate 3-Kinase Catalytic Subunit Delta	Protein Coding	O00329	60	GC01P009628	141.591	https://www.genecards.org/cgi-bin/carddisp.pl?gene=PIK3CD
TP53	Tumor Protein P53	Protein Coding	P04637	60	GC17M007661	138.53	https://www.genecards.org/cgi-bin/carddisp.pl?gene=TP53
RAG2	Recombination Activating 2	Protein Coding	P55895	47	GC11M036575	125.899	https://www.genecards.org/cgi-bin/carddisp.pl?gene=RAG2
ADA	Adenosine Deaminase	Protein Coding	P00813	58	GC20M044620	125.387	https://www.genecards.org/cgi-bin/carddisp.pl?gene=ADA
CTLA4	Cytotoxic T-Lymphocyte Associated Protein 4	Protein Coding	P16410	54	GC02P203854	124.501	https://www.genecards.org/cgi-bin/carddisp.pl?gene=CTLA4
CARD11	Caspase Recruitment Domain Family Member 11	Protein Coding	Q9BXL7	54	GC07M002906	120.965	https://www.genecards.org/cgi-bin/carddisp.pl?gene=CARD11
ZAP70	Zeta Chain Of T Cell Receptor Associated Protein Kinase 70	Protein Coding	P43403	58	GC02P097817	111.044	https://www.genecards.org/cgi-bin/carddisp.pl?gene=ZAP70
CD4	CD4 Molecule	Protein Coding	P01730	56	GC12P006786	110.755	https://www.genecards.org/cgi-bin/carddisp.pl?gene=CD4
ATM	ATM Serine/Threonine Kinase	Protein Coding	Q13315	60	GC11P108222	110.493	https://www.genecards.org/cgi-bin/carddisp.pl?gene=ATM
STAT3	Signal Transducer And Activator Of Transcription 3	Protein Coding	P40763	61	GC17M042313	106.775	https://www.genecards.org/cgi-bin/carddisp.pl?gene=STAT3
PTPRC	Protein Tyrosine Phosphatase Receptor Type C	Protein Coding	P08575	59	GC01P198607	104.981	https://www.genecards.org/cgi-bin/carddisp.pl?gene=PTPRC
TBX1	T-Box Transcription Factor 1	Protein Coding	O43435	49	GC22P051776	104.642	https://www.genecards.org/cgi-bin/carddisp.pl?gene=TBX1
IFNG	Interferon Gamma	Protein Coding	P01579	57	GC12M068154	104.511	https://www.genecards.org/cgi-bin/carddisp.pl?gene=IFNG
IL2	Interleukin 2	Protein Coding	P60568	52	GC04M122451	103.715	https://www.genecards.org/cgi-bin/carddisp.pl?gene=IL2
IL2RA	Interleukin 2 Receptor Subunit Alpha	Protein Coding	P01589	57	GC10M006010	102.068	https://www.genecards.org/cgi-bin/carddisp.pl?gene=IL2RA
MYC	MYC Proto-Oncogene, BHLH Transcription Factor	Protein Coding	P01106	59	GC08P127735	99.1519	https://www.genecards.org/cgi-bin/carddisp.pl?gene=MYC
FOXP3	Forkhead Box P3	Protein Coding	Q9BZS1	54	GC0XM049250	96.5923	https://www.genecards.org/cgi-bin/carddisp.pl?gene=FOXP3
FAS	Fas Cell Surface Death Receptor	Protein Coding	P25445	57	GC10P098532	95.337	https://www.genecards.org/cgi-bin/carddisp.pl?gene=FAS
FASLG	Fas Ligand	Protein Coding	P48023	55	GC01P172659	95.1496	https://www.genecards.org/cgi-bin/carddisp.pl?gene=FASLG
PTEN	Phosphatase And Tensin Homolog	Protein Coding	P60484	58	GC10P098516	94.3927	https://www.genecards.org/cgi-bin/carddisp.pl?gene=PTEN
FOXN1	Forkhead Box N1	Protein Coding	O15353	49	GC17P028506	93.089	https://www.genecards.org/cgi-bin/carddisp.pl?gene=FOXN1
TGFB1	Transforming Growth Factor Beta 1	Protein Coding	P01137	60	GC19M041301	93.0438	https://www.genecards.org/cgi-bin/carddisp.pl?gene=TGFB1
CD28	CD28 Molecule	Protein Coding	P10747	54	GC02P203706	92.8542	https://www.genecards.org/cgi-bin/carddisp.pl?gene=CD28
PIK3R1	Phosphoinositide-3-Kinase Regulatory Subunit 1	Protein Coding	P27986	58	GC05P068215	91.6582	https://www.genecards.org/cgi-bin/carddisp.pl?gene=PIK3R1
IL10	Interleukin 10	Protein Coding	P22301	54	GC01M206767	91.5831	https://www.genecards.org/cgi-bin/carddisp.pl?gene=IL10
LCK	LCK Proto-Oncogene, Src Family Tyrosine Kinase	Protein Coding	P06239	59	GC01P032251	89.7461	https://www.genecards.org/cgi-bin/carddisp.pl?gene=LCK
AKT1	AKT Serine/Threonine Kinase 1	Protein Coding	P31749	60	GC14M104769	88.5292	https://www.genecards.org/cgi-bin/carddisp.pl?gene=AKT1
IL7R	Interleukin 7 Receptor	Protein Coding	P16871	53	GC05P035852	88.3549	https://www.genecards.org/cgi-bin/carddisp.pl?gene=IL7R
CD3D	CD3 Delta Subunit Of T-Cell Receptor Complex	Protein Coding	P04234	54	GC11M118338	86.7944	https://www.genecards.org/cgi-bin/carddisp.pl?gene=CD3D
BCL10	BCL10 Immune Signaling Adaptor	Protein Coding	O95999	51	GC01M085265	85.8784	https://www.genecards.org/cgi-bin/carddisp.pl?gene=BCL10
BCL2	BCL2 Apoptosis Regulator	Protein Coding	P10415	58	GC18M063123	85.6587	https://www.genecards.org/cgi-bin/carddisp.pl?gene=BCL2
CDKN2A	Cyclin Dependent Kinase Inhibitor 2A	Protein Coding	Q8N726	58	GC09M021967	85.6546	https://www.genecards.org/cgi-bin/carddisp.pl?gene=CDKN2A
PIK3CG	Phosphatidylinositol-4,5-Bisphosphate 3-Kinase Catalytic Subunit Gamma	Protein Coding	P48736	56	GC07P106865	85.1804	https://www.genecards.org/cgi-bin/carddisp.pl?gene=PIK3CG
TNF	Tumor Necrosis Factor	Protein Coding	P01375	58	GC06P104098	85.0743	https://www.genecards.org/cgi-bin/carddisp.pl?gene=TNF
CD3G	CD3 Gamma Subunit Of T-Cell Receptor Complex	Protein Coding	P09693	54	GC11P118344	84.2185	https://www.genecards.org/cgi-bin/carddisp.pl?gene=CD3G
CD3E	CD3 Epsilon Subunit Of T-Cell Receptor Complex	Protein Coding	P07766	54	GC11P118304	84.0665	https://www.genecards.org/cgi-bin/carddisp.pl?gene=CD3E
KIT	KIT Proto-Oncogene, Receptor Tyrosine Kinase	Protein Coding	P10721	60	GC04P054657	83.945	https://www.genecards.org/cgi-bin/carddisp.pl?gene=KIT
IL2RG	Interleukin 2 Receptor Subunit Gamma	Protein Coding	P31785	54	GC0XM071108	82.9397	https://www.genecards.org/cgi-bin/carddisp.pl?gene=IL2RG
CD247	CD247 Molecule	Protein Coding	P20963	56	GC01M167399	81.8985	https://www.genecards.org/cgi-bin/carddisp.pl?gene=CD247
HAVCR2	Hepatitis A Virus Cellular Receptor 2	Protein Coding	Q8TDQ0	52	GC05M157063	81.5705	https://www.genecards.org/cgi-bin/carddisp.pl?gene=HAVCR2
EGFR	Epidermal Growth Factor Receptor	Protein Coding	P00533	62	GC07P055019	81.3457	https://www.genecards.org/cgi-bin/carddisp.pl?gene=EGFR
BCL11B	BCL11 Transcription Factor B	Protein Coding	Q9C0K0	49	GC14M099169	81.0045	https://www.genecards.org/cgi-bin/carddisp.pl?gene=BCL11B
IL4	Interleukin 4	Protein Coding	P05112	53	GC05P132673	80.1759	https://www.genecards.org/cgi-bin/carddisp.pl?gene=IL4
STAT1	Signal Transducer And Activator Of Transcription 1	Protein Coding	P42224	60	GC02M190908	79.0887	https://www.genecards.org/cgi-bin/carddisp.pl?gene=STAT1
ITK	IL2 Inducible T Cell Kinase	Protein Coding	Q08881	58	GC05P157158	78.9687	https://www.genecards.org/cgi-bin/carddisp.pl?gene=ITK
PIK3CA	Phosphatidylinositol-4,5-Bisphosphate 3-Kinase Catalytic Subunit Alpha	Protein Coding	P42336	59	GC03P179148	78.9568	https://www.genecards.org/cgi-bin/carddisp.pl?gene=PIK3CA
CD8A	CD8 Subunit Alpha	Protein Coding	P01732	54	GC02M086784	78.3666	https://www.genecards.org/cgi-bin/carddisp.pl?gene=CD8A
TRA	T Cell Receptor Alpha Locus	Protein Coding	P0DSE1	25	GC14P021621	77.2975	https://www.genecards.org/cgi-bin/carddisp.pl?gene=TRA
IL6	Interleukin 6	Protein Coding	P05231	58	GC07P022725	76.9716	https://www.genecards.org/cgi-bin/carddisp.pl?gene=IL6
BRAF	B-Raf Proto-Oncogene, Serine/Threonine Kinase	Protein Coding	P15056	61	GC07M140751	76.0922	https://www.genecards.org/cgi-bin/carddisp.pl?gene=BRAF
CTNNB1	Catenin Beta 1	Protein Coding	P35222	60	GC03P041194	76.0371	https://www.genecards.org/cgi-bin/carddisp.pl?gene=CTNNB1
NFATC2	Nuclear Factor Of Activated T Cells 2	Protein Coding	Q13469	52	GC20M051386	74.9912	https://www.genecards.org/cgi-bin/carddisp.pl?gene=NFATC2
ABL1	ABL Proto-Oncogene 1, Non-Receptor Tyrosine Kinase	Protein Coding	P00519	60	GC09P130713	74.8941	https://www.genecards.org/cgi-bin/carddisp.pl?gene=ABL1
LAT	Linker For Activation Of T Cells	Protein Coding	O43561	54	GC16P046960	74.825	https://www.genecards.org/cgi-bin/carddisp.pl?gene=LAT
TRB	T Cell Receptor Beta Locus	Protein Coding	P0DSE2	24	GC07P153238	74.797	https://www.genecards.org/cgi-bin/carddisp.pl?gene=TRB
CCND1	Cyclin D1	Protein Coding	P24385	60	GC11P069641	74.5135	https://www.genecards.org/cgi-bin/carddisp.pl?gene=CCND1
CASP8	Caspase 8	Protein Coding	Q14790	59	GC02P201233	74.1927	https://www.genecards.org/cgi-bin/carddisp.pl?gene=CASP8
MAPK1	Mitogen-Activated Protein Kinase 1	Protein Coding	P28482	60	GC22M021759	74.1608	https://www.genecards.org/cgi-bin/carddisp.pl?gene=MAPK1
HRAS	HRas Proto-Oncogene, GTPase	Protein Coding	P01112	59	GC11M007933	72.6974	https://www.genecards.org/cgi-bin/carddisp.pl?gene=HRAS
HLA-DRB1	Major Histocompatibility Complex, Class II, DR Beta 1	Protein Coding	P01911	54	GC06M080969	72.5241	https://www.genecards.org/cgi-bin/carddisp.pl?gene=HLA-DRB1
BAX	BCL2 Associated X, Apoptosis Regulator	Protein Coding	Q07812	57	GC19P048954	71.4723	https://www.genecards.org/cgi-bin/carddisp.pl?gene=BAX
IL7	Interleukin 7	Protein Coding	P13232	50	GC08M078689	70.535	https://www.genecards.org/cgi-bin/carddisp.pl?gene=IL7
KRAS	KRAS Proto-Oncogene, GTPase	Protein Coding	P01116	60	GC12M025583	69.819	https://www.genecards.org/cgi-bin/carddisp.pl?gene=KRAS
ICOSLG	Inducible T Cell Costimulator Ligand	Protein Coding	O75144	48	GC21M044222	68.8969	https://www.genecards.org/cgi-bin/carddisp.pl?gene=ICOSLG
IL2RB	Interleukin 2 Receptor Subunit Beta	Protein Coding	P14784	57	GC22M068173	68.5925	https://www.genecards.org/cgi-bin/carddisp.pl?gene=IL2RB
CD40LG	CD40 Ligand	Protein Coding	P29965	57	GC0XP136649	67.9105	https://www.genecards.org/cgi-bin/carddisp.pl?gene=CD40LG
MTOR	Mechanistic Target Of Rapamycin Kinase	Protein Coding	P42345	62	GC01M011106	67.6538	https://www.genecards.org/cgi-bin/carddisp.pl?gene=MTOR
IKBKB	Inhibitor Of Nuclear Factor Kappa B Kinase Subunit Beta	Protein Coding	O14920	61	GC08P042271	67.0212	https://www.genecards.org/cgi-bin/carddisp.pl?gene=IKBKB
ERBB2	Erb-B2 Receptor Tyrosine Kinase 2	Protein Coding	P04626	62	GC17P039687	66.9799	https://www.genecards.org/cgi-bin/carddisp.pl?gene=ERBB2
ICAM1	Intercellular Adhesion Molecule 1	Protein Coding	P05362	57	GC19P011104	66.9434	https://www.genecards.org/cgi-bin/carddisp.pl?gene=ICAM1
FLT3	Fms Related Receptor Tyrosine Kinase 3	Protein Coding	P36888	60	GC13M028003	66.4543	https://www.genecards.org/cgi-bin/carddisp.pl?gene=FLT3
PDCD1	Programmed Cell Death 1	Protein Coding	Q15116	54	GC02M241849	65.4433	https://www.genecards.org/cgi-bin/carddisp.pl?gene=PDCD1
ICOS	Inducible T Cell Costimulator	Protein Coding	Q9Y6W8	51	GC02P203937	64.5962	https://www.genecards.org/cgi-bin/carddisp.pl?gene=ICOS
NOTCH1	Notch Receptor 1	Protein Coding	P46531	58	GC09M138170	64.2595	https://www.genecards.org/cgi-bin/carddisp.pl?gene=NOTCH1
CD27	CD27 Molecule	Protein Coding	P26842	54	GC12P028168	63.4039	https://www.genecards.org/cgi-bin/carddisp.pl?gene=CD27
BCL6	BCL6 Transcription Repressor	Protein Coding	P41182	53	GC03M187721	63.3533	https://www.genecards.org/cgi-bin/carddisp.pl?gene=BCL6
TFRC	Transferrin Receptor	Protein Coding	P02786	57	GC03M196144	63.2631	https://www.genecards.org/cgi-bin/carddisp.pl?gene=TFRC
JUN	Jun Proto-Oncogene, AP-1 Transcription Factor Subunit	Protein Coding	P05412	56	GC01M058780	63.2603	https://www.genecards.org/cgi-bin/carddisp.pl?gene=JUN
RUNX1	RUNX Family Transcription Factor 1	Protein Coding	Q01196	56	GC21M034787	63.1976	https://www.genecards.org/cgi-bin/carddisp.pl?gene=RUNX1
NFKB1	Nuclear Factor Kappa B Subunit 1	Protein Coding	P19838	60	GC04P102501	63.0263	https://www.genecards.org/cgi-bin/carddisp.pl?gene=NFKB1
TBXT	T-Box Transcription Factor T	Protein Coding	O15178	51	GC06M166158	62.2422	https://www.genecards.org/cgi-bin/carddisp.pl?gene=TBXT
RB1	RB Transcriptional Corepressor 1	Protein Coding	P06400	55	GC13P048303	62.2374	https://www.genecards.org/cgi-bin/carddisp.pl?gene=RB1
SYK	Spleen Associated Tyrosine Kinase	Protein Coding	P43405	57	GC09P094897	62.0969	https://www.genecards.org/cgi-bin/carddisp.pl?gene=SYK
CDK4	Cyclin Dependent Kinase 4	Protein Coding	P11802	61	GC12M058711	61.9496	https://www.genecards.org/cgi-bin/carddisp.pl?gene=CDK4
CD274	CD274 Molecule	Protein Coding	Q9NZQ7	52	GC09P005450	61.8613	https://www.genecards.org/cgi-bin/carddisp.pl?gene=CD274
PTPN11	Protein Tyrosine Phosphatase Non-Receptor Type 11	Protein Coding	Q06124	61	GC12P112418	61.8398	https://www.genecards.org/cgi-bin/carddisp.pl?gene=PTPN11
IRF1	Interferon Regulatory Factor 1	Protein Coding	P10914	53	GC05M132440	61.7612	https://www.genecards.org/cgi-bin/carddisp.pl?gene=IRF1
RASGRP1	RAS Guanyl Releasing Protein 1	Protein Coding	O95267	54	GC15M038488	61.0718	https://www.genecards.org/cgi-bin/carddisp.pl?gene=RASGRP1
C11orf65	Chromosome 11 Open Reading Frame 65	Protein Coding	Q8NCR3	37	GC11M108308	60.8253	https://www.genecards.org/cgi-bin/carddisp.pl?gene=C11orf65
RAC2	Rac Family Small GTPase 2	Protein Coding	P15153	58	GC22M068176	60.6484	https://www.genecards.org/cgi-bin/carddisp.pl?gene=RAC2
NFATC1	Nuclear Factor Of Activated T Cells 1	Protein Coding	O95644	54	GC18P079395	60.5303	https://www.genecards.org/cgi-bin/carddisp.pl?gene=NFATC1
EP300	E1A Binding Protein P300	Protein Coding	Q09472	60	GC22P052546	60.2781	https://www.genecards.org/cgi-bin/carddisp.pl?gene=EP300
MALT1	MALT1 Paracaspase	Protein Coding	Q9UDY8	54	GC18P058671	59.9488	https://www.genecards.org/cgi-bin/carddisp.pl?gene=MALT1
IKBKG	Inhibitor Of Nuclear Factor Kappa B Kinase Regulatory Subunit Gamma	Protein Coding	Q9Y6K9	54	GC0XP154541	59.9452	https://www.genecards.org/cgi-bin/carddisp.pl?gene=IKBKG
NRAS	NRAS Proto-Oncogene, GTPase	Protein Coding	P01111	57	GC01M114704	59.4535	https://www.genecards.org/cgi-bin/carddisp.pl?gene=NRAS
CASP3	Caspase 3	Protein Coding	P42574	56	GC04M184627	59.3567	https://www.genecards.org/cgi-bin/carddisp.pl?gene=CASP3
CREBBP	CREB Binding Protein	Protein Coding	Q92793	61	GC16M010660	59.3054	https://www.genecards.org/cgi-bin/carddisp.pl?gene=CREBBP
PRKCD	Protein Kinase C Delta	Protein Coding	Q05655	58	GC03P053156	59.2012	https://www.genecards.org/cgi-bin/carddisp.pl?gene=PRKCD
CXCR4	C-X-C Motif Chemokine Receptor 4	Protein Coding	P61073	59	GC02M136114	59.0553	https://www.genecards.org/cgi-bin/carddisp.pl?gene=CXCR4
VEGFA	Vascular Endothelial Growth Factor A	Protein Coding	P15692	56	GC06P043770	58.9231	https://www.genecards.org/cgi-bin/carddisp.pl?gene=VEGFA
IL15	Interleukin 15	Protein Coding	P40933	49	GC04P141636	58.7947	https://www.genecards.org/cgi-bin/carddisp.pl?gene=IL15
GZMB	Granzyme B	Protein Coding	P10144	54	GC14M024630	58.4881	https://www.genecards.org/cgi-bin/carddisp.pl?gene=GZMB
IL1B	Interleukin 1 Beta	Protein Coding	P01584	54	GC02M112829	58.3815	https://www.genecards.org/cgi-bin/carddisp.pl?gene=IL1B
XIAP	X-Linked Inhibitor Of Apoptosis	Protein Coding	P98170	58	GC0XP123859	58.3312	https://www.genecards.org/cgi-bin/carddisp.pl?gene=XIAP
IL17A	Interleukin 17A	Protein Coding	Q16552	49	GC06P052186	58.3226	https://www.genecards.org/cgi-bin/carddisp.pl?gene=IL17A
CCR5	C-C Motif Chemokine Receptor 5	Protein Coding	P51681	53	GC03P051153	58.1784	https://www.genecards.org/cgi-bin/carddisp.pl?gene=CCR5
CXCL8	C-X-C Motif Chemokine Ligand 8	Protein Coding	P10145	50	GC04P073740	58.1775	https://www.genecards.org/cgi-bin/carddisp.pl?gene=CXCL8
TBX2	T-Box Transcription Factor 2	Protein Coding	Q13207	53	GC17P061399	58.0348	https://www.genecards.org/cgi-bin/carddisp.pl?gene=TBX2
CD40	CD40 Molecule	Protein Coding	P25942	57	GC20P046118	57.9903	https://www.genecards.org/cgi-bin/carddisp.pl?gene=CD40
LCP2	Lymphocyte Cytosolic Protein 2	Protein Coding	Q13094	50	GC05M170246	57.986	https://www.genecards.org/cgi-bin/carddisp.pl?gene=LCP2
B2M	Beta-2-Microglobulin	Protein Coding	P61769	56	GC15P044711	57.7033	https://www.genecards.org/cgi-bin/carddisp.pl?gene=B2M
DOCK8	Dedicator Of Cytokinesis 8	Protein Coding	Q8NF50	52	GC09P000215	57.5974	https://www.genecards.org/cgi-bin/carddisp.pl?gene=DOCK8
TCF3	Transcription Factor 3	Protein Coding	P15923	53	GC19M001609	57.576	https://www.genecards.org/cgi-bin/carddisp.pl?gene=TCF3
SH2D1A	SH2 Domain Containing 1A	Protein Coding	O60880	53	GC0XP124227	56.8336	https://www.genecards.org/cgi-bin/carddisp.pl?gene=SH2D1A
CCL5	C-C Motif Chemokine Ligand 5	Protein Coding	P13501	50	GC17M035871	56.8052	https://www.genecards.org/cgi-bin/carddisp.pl?gene=CCL5
CDH1	Cadherin 1	Protein Coding	P12830	56	GC16P068737	56.6969	https://www.genecards.org/cgi-bin/carddisp.pl?gene=CDH1
CDKN1A	Cyclin Dependent Kinase Inhibitor 1A	Protein Coding	P38936	56	GC06P104241	56.4932	https://www.genecards.org/cgi-bin/carddisp.pl?gene=CDKN1A
KITLG	KIT Ligand	Protein Coding	P21583	53	GC12M088492	56.3027	https://www.genecards.org/cgi-bin/carddisp.pl?gene=KITLG
TLX1	T Cell Leukemia Homeobox 1	Protein Coding	P31314	46	GC10P101130	56.0291	https://www.genecards.org/cgi-bin/carddisp.pl?gene=TLX1
FGFR3	Fibroblast Growth Factor Receptor 3	Protein Coding	P22607	62	GC04P001900	55.9152	https://www.genecards.org/cgi-bin/carddisp.pl?gene=FGFR3
ALK	ALK Receptor Tyrosine Kinase	Protein Coding	Q9UM73	57	GC02M029190	55.5811	https://www.genecards.org/cgi-bin/carddisp.pl?gene=ALK
TERT	Telomerase Reverse Transcriptase	Protein Coding	O14746	58	GC05M001253	55.336	https://www.genecards.org/cgi-bin/carddisp.pl?gene=TERT
CARMIL2	Capping Protein Regulator And Myosin 1 Linker 2	Protein Coding	Q6F5E8	42	GC16P067644	55.3336	https://www.genecards.org/cgi-bin/carddisp.pl?gene=CARMIL2
CD44	CD44 Molecule (Indian Blood Group)	Protein Coding	P16070	55	GC11P035139	55.3192	https://www.genecards.org/cgi-bin/carddisp.pl?gene=CD44
FBXW7	F-Box And WD Repeat Domain Containing 7	Protein Coding	Q969H0	52	GC04M152321	55.1842	https://www.genecards.org/cgi-bin/carddisp.pl?gene=FBXW7
MAPK8	Mitogen-Activated Protein Kinase 8	Protein Coding	P45983	56	GC10P048306	55.0795	https://www.genecards.org/cgi-bin/carddisp.pl?gene=MAPK8
JAK2	Janus Kinase 2	Protein Coding	O60674	60	GC09P004985	54.724	https://www.genecards.org/cgi-bin/carddisp.pl?gene=JAK2
TAL1	TAL BHLH Transcription Factor 1, Erythroid Differentiation Factor	Protein Coding	P17542	52	GC01M047216	54.6908	https://www.genecards.org/cgi-bin/carddisp.pl?gene=TAL1
BCR	BCR Activator Of RhoGEF And GTPase	Protein Coding	P11274	58	GC22P023179	54.6891	https://www.genecards.org/cgi-bin/carddisp.pl?gene=BCR
ITGB1	Integrin Subunit Beta 1	Protein Coding	P05556	57	GC10M034478	54.6324	https://www.genecards.org/cgi-bin/carddisp.pl?gene=ITGB1
IL5	Interleukin 5	Protein Coding	P05113	52	GC05M132541	54.4112	https://www.genecards.org/cgi-bin/carddisp.pl?gene=IL5
MET	MET Proto-Oncogene, Receptor Tyrosine Kinase	Protein Coding	P08581	61	GC07P116672	54.3074	https://www.genecards.org/cgi-bin/carddisp.pl?gene=MET
IRF4	Interferon Regulatory Factor 4	Protein Coding	Q15306	50	GC06P000391	54.2251	https://www.genecards.org/cgi-bin/carddisp.pl?gene=IRF4
GATA3	GATA Binding Protein 3	Protein Coding	P23771	56	GC10P008045	54.1801	https://www.genecards.org/cgi-bin/carddisp.pl?gene=GATA3
RHOH	Ras Homolog Family Member H	Protein Coding	Q15669	50	GC04P040192	54.1285	https://www.genecards.org/cgi-bin/carddisp.pl?gene=RHOH
RAF1	Raf-1 Proto-Oncogene, Serine/Threonine Kinase	Protein Coding	P04049	61	GC03M012583	53.7271	https://www.genecards.org/cgi-bin/carddisp.pl?gene=RAF1
PRF1	Perforin 1	Protein Coding	P14222	53	GC10M070597	53.6903	https://www.genecards.org/cgi-bin/carddisp.pl?gene=PRF1
CDKN1B	Cyclin Dependent Kinase Inhibitor 1B	Protein Coding	P46527	56	GC12P028528	53.6124	https://www.genecards.org/cgi-bin/carddisp.pl?gene=CDKN1B
CHEK2	Checkpoint Kinase 2	Protein Coding	O96017	61	GC22M028687	53.5908	https://www.genecards.org/cgi-bin/carddisp.pl?gene=CHEK2
CCR6	C-C Motif Chemokine Receptor 6	Protein Coding	P51684	50	GC06P167111	53.4791	https://www.genecards.org/cgi-bin/carddisp.pl?gene=CCR6
TBX21	T-Box Transcription Factor 21	Protein Coding	Q9UL17	52	GC17P047733	53.2684	https://www.genecards.org/cgi-bin/carddisp.pl?gene=TBX21
TRAC	T Cell Receptor Alpha Constant	Protein Coding	P01848	34	GC14P038415	53.2409	https://www.genecards.org/cgi-bin/carddisp.pl?gene=TRAC
BRCA2	BRCA2 DNA Repair Associated	Protein Coding	P51587	54	GC13P032315	53.2087	https://www.genecards.org/cgi-bin/carddisp.pl?gene=BRCA2
SRC	SRC Proto-Oncogene, Non-Receptor Tyrosine Kinase	Protein Coding	P12931	58	GC20P037344	53.1582	https://www.genecards.org/cgi-bin/carddisp.pl?gene=SRC
NPM1	Nucleophosmin 1	Protein Coding	P06748	57	GC05P171387	53.1565	https://www.genecards.org/cgi-bin/carddisp.pl?gene=NPM1
CD19	CD19 Molecule	Protein Coding	P15391	58	GC16P046954	53.1428	https://www.genecards.org/cgi-bin/carddisp.pl?gene=CD19
TCL1A	TCL1 Family AKT Coactivator A	Protein Coding	P56279	49	GC14M095709	52.9835	https://www.genecards.org/cgi-bin/carddisp.pl?gene=TCL1A
HLA-B	Major Histocompatibility Complex, Class I, B	Protein Coding	P01889	53	GC06M080881	52.9772	https://www.genecards.org/cgi-bin/carddisp.pl?gene=HLA-B
PKLR	Pyruvate Kinase L/R	Protein Coding	P30613	53	GC01M155289	52.9724	https://www.genecards.org/cgi-bin/carddisp.pl?gene=PKLR
IRF8	Interferon Regulatory Factor 8	Protein Coding	Q02556	52	GC16P085898	52.9462	https://www.genecards.org/cgi-bin/carddisp.pl?gene=IRF8
BRCA1	BRCA1 DNA Repair Associated	Protein Coding	P38398	57	GC17M043044	52.8801	https://www.genecards.org/cgi-bin/carddisp.pl?gene=BRCA1
PPARG	Peroxisome Proliferator Activated Receptor Gamma	Protein Coding	P37231	60	GC03P012287	52.698	https://www.genecards.org/cgi-bin/carddisp.pl?gene=PPARG
NBN	Nibrin	Protein Coding	O60934	55	GC08M089933	52.6657	https://www.genecards.org/cgi-bin/carddisp.pl?gene=NBN
G6PD	Glucose-6-Phosphate Dehydrogenase	Protein Coding	P11413	57	GC0XM154578	52.6573	https://www.genecards.org/cgi-bin/carddisp.pl?gene=G6PD
CXCL12	C-X-C Motif Chemokine Ligand 12	Protein Coding	P48061	52	GC10M044370	52.1799	https://www.genecards.org/cgi-bin/carddisp.pl?gene=CXCL12
CDK2	Cyclin Dependent Kinase 2	Protein Coding	P24941	58	GC12P055966	52.1657	https://www.genecards.org/cgi-bin/carddisp.pl?gene=CDK2
NFKBIA	NFKB Inhibitor Alpha	Protein Coding	P25963	57	GC14M035401	52.1355	https://www.genecards.org/cgi-bin/carddisp.pl?gene=NFKBIA
NFE2L2	NFE2 Like BZIP Transcription Factor 2	Protein Coding	Q16236	58	GC02M177227	52.1139	https://www.genecards.org/cgi-bin/carddisp.pl?gene=NFE2L2
FGFR1	Fibroblast Growth Factor Receptor 1	Protein Coding	P11362	62	GC08M038400	52.0668	https://www.genecards.org/cgi-bin/carddisp.pl?gene=FGFR1
DCLRE1C	DNA Cross-Link Repair 1C	Protein Coding	Q96SD1	51	GC10M014897	51.7944	https://www.genecards.org/cgi-bin/carddisp.pl?gene=DCLRE1C
CD2	CD2 Molecule	Protein Coding	P06729	51	GC01P116754	51.7395	https://www.genecards.org/cgi-bin/carddisp.pl?gene=CD2
RHOA	Ras Homolog Family Member A	Protein Coding	P61586	57	GC03M049359	51.6881	https://www.genecards.org/cgi-bin/carddisp.pl?gene=RHOA
HLA-A	Major Histocompatibility Complex, Class I, A	Protein Coding	P04439	53	GC06P104057	51.0739	https://www.genecards.org/cgi-bin/carddisp.pl?gene=HLA-A
STAT5B	Signal Transducer And Activator Of Transcription 5B	Protein Coding	P51692	57	GC17M042199	51.0382	https://www.genecards.org/cgi-bin/carddisp.pl?gene=STAT5B
KMT2A	Lysine Methyltransferase 2A	Protein Coding	Q03164	54	GC11P118436	50.8885	https://www.genecards.org/cgi-bin/carddisp.pl?gene=KMT2A
IL21	Interleukin 21	Protein Coding	Q9HBE4	51	GC04M122612	50.8875	https://www.genecards.org/cgi-bin/carddisp.pl?gene=IL21
RELA	RELA Proto-Oncogene, NF-KB Subunit	Protein Coding	Q04206	58	GC11M065653	50.8378	https://www.genecards.org/cgi-bin/carddisp.pl?gene=RELA
TRG	T Cell Receptor Gamma Locus	Protein Coding		16	GC07M038240	50.8342	https://www.genecards.org/cgi-bin/carddisp.pl?gene=TRG
CR2	Complement C3d Receptor 2	Protein Coding	P20023	53	GC01P207454	50.7405	https://www.genecards.org/cgi-bin/carddisp.pl?gene=CR2
MAP2K1	Mitogen-Activated Protein Kinase Kinase 1	Protein Coding	Q02750	61	GC15P066386	50.7205	https://www.genecards.org/cgi-bin/carddisp.pl?gene=MAP2K1
FYN	FYN Proto-Oncogene, Src Family Tyrosine Kinase	Protein Coding	P06241	54	GC06M111660	50.2902	https://www.genecards.org/cgi-bin/carddisp.pl?gene=FYN
PNP	Purine Nucleoside Phosphorylase	Protein Coding	P00491	56	GC14P038215	50.2855	https://www.genecards.org/cgi-bin/carddisp.pl?gene=PNP
IL3	Interleukin 3	Protein Coding	P08700	52	GC05P132060	50.2054	https://www.genecards.org/cgi-bin/carddisp.pl?gene=IL3
CBL	Cbl Proto-Oncogene	Protein Coding	P22681	58	GC11P119206	49.9584	https://www.genecards.org/cgi-bin/carddisp.pl?gene=CBL
IKZF1	IKAROS Family Zinc Finger 1	Protein Coding	Q13422	56	GC07P050303	49.9209	https://www.genecards.org/cgi-bin/carddisp.pl?gene=IKZF1
TET2	Tet Methylcytosine Dioxygenase 2	Protein Coding	Q6N021	53	GC04P105145	49.832	https://www.genecards.org/cgi-bin/carddisp.pl?gene=TET2
CD80	CD80 Molecule	Protein Coding	P33681	50	GC03M119524	49.2465	https://www.genecards.org/cgi-bin/carddisp.pl?gene=CD80
MYD88	MYD88 Innate Immune Signal Transduction Adaptor	Protein Coding	Q99836	56	GC03P038185	49.1335	https://www.genecards.org/cgi-bin/carddisp.pl?gene=MYD88
HLA-C	Major Histocompatibility Complex, Class I, C	Protein Coding	P10321	50	GC06M080880	48.9971	https://www.genecards.org/cgi-bin/carddisp.pl?gene=HLA-C
CASP10	Caspase 10	Protein Coding	Q92851	55	GC02P201182	48.7375	https://www.genecards.org/cgi-bin/carddisp.pl?gene=CASP10
CSF2	Colony Stimulating Factor 2	Protein Coding	P04141	52	GC05P132073	48.6809	https://www.genecards.org/cgi-bin/carddisp.pl?gene=CSF2
TNFRSF1B	TNF Receptor Superfamily Member 1B	Protein Coding	P20333	56	GC01P012401	48.6317	https://www.genecards.org/cgi-bin/carddisp.pl?gene=TNFRSF1B
HBB	Hemoglobin Subunit Beta	Protein Coding	P68871	52	GC11M008309	48.4631	https://www.genecards.org/cgi-bin/carddisp.pl?gene=HBB
NFATC3	Nuclear Factor Of Activated T Cells 3	Protein Coding	Q12968	50	GC16P068084	48.3986	https://www.genecards.org/cgi-bin/carddisp.pl?gene=NFATC3
ETV6	ETS Variant Transcription Factor 6	Protein Coding	P41212	53	GC12P011649	48.3845	https://www.genecards.org/cgi-bin/carddisp.pl?gene=ETV6
VCAM1	Vascular Cell Adhesion Molecule 1	Protein Coding	P19320	53	GC01P100719	48.2969	https://www.genecards.org/cgi-bin/carddisp.pl?gene=VCAM1
FOS	Fos Proto-Oncogene, AP-1 Transcription Factor Subunit	Protein Coding	P01100	58	GC14P075278	48.0774	https://www.genecards.org/cgi-bin/carddisp.pl?gene=FOS
INS	Insulin	Protein Coding	P01308	54	GC11M002159	48.0621	https://www.genecards.org/cgi-bin/carddisp.pl?gene=INS
RAC1	Rac Family Small GTPase 1	Protein Coding	P63000	56	GC07P006378	47.9984	https://www.genecards.org/cgi-bin/carddisp.pl?gene=RAC1
ITGB2	Integrin Subunit Beta 2	Protein Coding	P05107	57	GC21M044885	47.9817	https://www.genecards.org/cgi-bin/carddisp.pl?gene=ITGB2
CD5	CD5 Molecule	Protein Coding	P06127	49	GC11P061123	47.7204	https://www.genecards.org/cgi-bin/carddisp.pl?gene=CD5
PLCG1	Phospholipase C Gamma 1	Protein Coding	P19174	54	GC20P041136	47.5619	https://www.genecards.org/cgi-bin/carddisp.pl?gene=PLCG1
CRTAM	Cytotoxic And Regulatory T Cell Molecule	Protein Coding	O95727	42	GC11P122840	47.5189	https://www.genecards.org/cgi-bin/carddisp.pl?gene=CRTAM
VHL	Von Hippel-Lindau Tumor Suppressor	Protein Coding	P40337	54	GC03P014626	47.4441	https://www.genecards.org/cgi-bin/carddisp.pl?gene=VHL
PRKAR1A	Protein Kinase CAMP-Dependent Type I Regulatory Subunit Alpha	Protein Coding	P10644	58	GC17P079119	47.2554	https://www.genecards.org/cgi-bin/carddisp.pl?gene=PRKAR1A
BCL2L1	BCL2 Like 1	Protein Coding	Q07817	54	GC20M031664	47.2515	https://www.genecards.org/cgi-bin/carddisp.pl?gene=BCL2L1
IL13	Interleukin 13	Protein Coding	P35225	49	GC05P132656	47.223	https://www.genecards.org/cgi-bin/carddisp.pl?gene=IL13
SMAD4	SMAD Family Member 4	Protein Coding	Q13485	60	GC18P051028	47.0804	https://www.genecards.org/cgi-bin/carddisp.pl?gene=SMAD4
ITGA4	Integrin Subunit Alpha 4	Protein Coding	P13612	55	GC02P181456	46.9842	https://www.genecards.org/cgi-bin/carddisp.pl?gene=ITGA4
CD86	CD86 Molecule	Protein Coding	P42081	51	GC03P122055	46.8771	https://www.genecards.org/cgi-bin/carddisp.pl?gene=CD86
ITGAL	Integrin Subunit Alpha L	Protein Coding	P20701	53	GC16P030472	46.7693	https://www.genecards.org/cgi-bin/carddisp.pl?gene=ITGAL
MAPK14	Mitogen-Activated Protein Kinase 14	Protein Coding	Q16539	57	GC06P104232	46.6102	https://www.genecards.org/cgi-bin/carddisp.pl?gene=MAPK14
PAX5	Paired Box 5	Protein Coding	Q02548	53	GC09M036941	46.4622	https://www.genecards.org/cgi-bin/carddisp.pl?gene=PAX5
FGFR2	Fibroblast Growth Factor Receptor 2	Protein Coding	P21802	62	GC10M121478	46.4442	https://www.genecards.org/cgi-bin/carddisp.pl?gene=FGFR2
CREB1	CAMP Responsive Element Binding Protein 1	Protein Coding	P16220	57	GC02P207529	46.4219	https://www.genecards.org/cgi-bin/carddisp.pl?gene=CREB1
TNFSF10	TNF Superfamily Member 10	Protein Coding	P50591	51	GC03M172505	46.3642	https://www.genecards.org/cgi-bin/carddisp.pl?gene=TNFSF10
NCAM1	Neural Cell Adhesion Molecule 1	Protein Coding	P13591	55	GC11P112961	46.3265	https://www.genecards.org/cgi-bin/carddisp.pl?gene=NCAM1
CCR7	C-C Motif Chemokine Receptor 7	Protein Coding	P32248	51	GC17M060791	46.2698	https://www.genecards.org/cgi-bin/carddisp.pl?gene=CCR7
CCL2	C-C Motif Chemokine Ligand 2	Protein Coding	P13500	55	GC17P034255	46.0248	https://www.genecards.org/cgi-bin/carddisp.pl?gene=CCL2
AKT2	AKT Serine/Threonine Kinase 2	Protein Coding	P31751	61	GC19M040230	45.9382	https://www.genecards.org/cgi-bin/carddisp.pl?gene=AKT2
MYB	MYB Proto-Oncogene, Transcription Factor	Protein Coding	P10242	56	GC06P135180	45.8824	https://www.genecards.org/cgi-bin/carddisp.pl?gene=MYB
STAT5A	Signal Transducer And Activator Of Transcription 5A	Protein Coding	P42229	54	GC17P042287	45.8408	https://www.genecards.org/cgi-bin/carddisp.pl?gene=STAT5A
SELL	Selectin L	Protein Coding	P14151	49	GC01M169690	45.7484	https://www.genecards.org/cgi-bin/carddisp.pl?gene=SELL
KLRK1	Killer Cell Lectin Like Receptor K1	Protein Coding	P26718	47	GC12M024904	45.7389	https://www.genecards.org/cgi-bin/carddisp.pl?gene=KLRK1
NFAT5	Nuclear Factor Of Activated T Cells 5	Protein Coding	O94916	49	GC16P069565	45.5723	https://www.genecards.org/cgi-bin/carddisp.pl?gene=NFAT5
HLA-G	Major Histocompatibility Complex, Class I, G	Protein Coding	P17693	50	GC06P104048	45.5341	https://www.genecards.org/cgi-bin/carddisp.pl?gene=HLA-G
TLX3	T Cell Leukemia Homeobox 3	Protein Coding	O43711	44	GC05P171309	45.5054	https://www.genecards.org/cgi-bin/carddisp.pl?gene=TLX3
PIK3R2	Phosphoinositide-3-Kinase Regulatory Subunit 2	Protein Coding	O00459	57	GC19P018153	45.4897	https://www.genecards.org/cgi-bin/carddisp.pl?gene=PIK3R2
SREBF1	Sterol Regulatory Element Binding Transcription Factor 1	Protein Coding	P36956	55	GC17M017810	45.3971	https://www.genecards.org/cgi-bin/carddisp.pl?gene=SREBF1
WAS	WASP Actin Nucleation Promoting Factor	Protein Coding	P42768	54	GC0XP048676	45.395	https://www.genecards.org/cgi-bin/carddisp.pl?gene=WAS
TYK2	Tyrosine Kinase 2	Protein Coding	P29597	60	GC19M010350	45.319	https://www.genecards.org/cgi-bin/carddisp.pl?gene=TYK2
TGFBR2	Transforming Growth Factor Beta Receptor 2	Protein Coding	P37173	59	GC03P030623	45.2557	https://www.genecards.org/cgi-bin/carddisp.pl?gene=TGFBR2
TNFRSF9	TNF Receptor Superfamily Member 9	Protein Coding	Q07011	50	GC01M007915	45.2235	https://www.genecards.org/cgi-bin/carddisp.pl?gene=TNFRSF9
ABCB1	ATP Binding Cassette Subfamily B Member 1	Protein Coding	P08183	58	GC07M087504	45.2106	https://www.genecards.org/cgi-bin/carddisp.pl?gene=ABCB1
MDM2	MDM2 Proto-Oncogene	Protein Coding	Q00987	60	GC12P068808	45.2065	https://www.genecards.org/cgi-bin/carddisp.pl?gene=MDM2
DNMT3A	DNA Methyltransferase 3 Alpha	Protein Coding	Q9Y6K1	58	GC02M025228	45.1893	https://www.genecards.org/cgi-bin/carddisp.pl?gene=DNMT3A
DPP4	Dipeptidyl Peptidase 4	Protein Coding	P27487	56	GC02M161992	45.0546	https://www.genecards.org/cgi-bin/carddisp.pl?gene=DPP4
RARA	Retinoic Acid Receptor Alpha	Protein Coding	P10276	57	GC17P040309	45.0484	https://www.genecards.org/cgi-bin/carddisp.pl?gene=RARA
U2AF1	U2 Small Nuclear RNA Auxiliary Factor 1	Protein Coding	Q01081	49	GC21M043092	44.8863	https://www.genecards.org/cgi-bin/carddisp.pl?gene=U2AF1
STK11	Serine/Threonine Kinase 11	Protein Coding	Q15831	57	GC19P001177	44.8524	https://www.genecards.org/cgi-bin/carddisp.pl?gene=STK11
HIF1A	Hypoxia Inducible Factor 1 Subunit Alpha	Protein Coding	Q16665	55	GC14P061695	44.8371	https://www.genecards.org/cgi-bin/carddisp.pl?gene=HIF1A
IGF1R	Insulin Like Growth Factor 1 Receptor	Protein Coding	P08069	61	GC15P098648	44.5903	https://www.genecards.org/cgi-bin/carddisp.pl?gene=IGF1R
GATA2	GATA Binding Protein 2	Protein Coding	P23769	56	GC03M128479	44.5311	https://www.genecards.org/cgi-bin/carddisp.pl?gene=GATA2
CXCR3	C-X-C Motif Chemokine Receptor 3	Protein Coding	P49682	50	GC0XM071615	44.5278	https://www.genecards.org/cgi-bin/carddisp.pl?gene=CXCR3
RIPK1	Receptor Interacting Serine/Threonine Kinase 1	Protein Coding	Q13546	56	GC06P003520	44.5131	https://www.genecards.org/cgi-bin/carddisp.pl?gene=RIPK1
LRBA	LPS Responsive Beige-Like Anchor Protein	Protein Coding	P50851	48	GC04M150264	44.4733	https://www.genecards.org/cgi-bin/carddisp.pl?gene=LRBA
SP1	Sp1 Transcription Factor	Protein Coding	P08047	52	GC12P053380	44.4708	https://www.genecards.org/cgi-bin/carddisp.pl?gene=SP1
LEP	Leptin	Protein Coding	P41159	53	GC07P128241	44.3967	https://www.genecards.org/cgi-bin/carddisp.pl?gene=LEP
BTK	Bruton Tyrosine Kinase	Protein Coding	Q06187	61	GC0XM101349	44.3658	https://www.genecards.org/cgi-bin/carddisp.pl?gene=BTK
ESR1	Estrogen Receptor 1	Protein Coding	P03372	61	GC06P151656	44.358	https://www.genecards.org/cgi-bin/carddisp.pl?gene=ESR1
CIITA	Class II Major Histocompatibility Complex Transactivator	Protein Coding	P33076	51	GC16P046153	44.1686	https://www.genecards.org/cgi-bin/carddisp.pl?gene=CIITA
ACTA2	Actin Alpha 2, Smooth Muscle	Protein Coding	P62736	53	GC10M088935	44.1451	https://www.genecards.org/cgi-bin/carddisp.pl?gene=ACTA2
MKI67	Marker Of Proliferation Ki-67	Protein Coding	P46013	51	GC10M128096	44.0433	https://www.genecards.org/cgi-bin/carddisp.pl?gene=MKI67
STK4	Serine/Threonine Kinase 4	Protein Coding	Q13043	56	GC20P044966	43.8152	https://www.genecards.org/cgi-bin/carddisp.pl?gene=STK4
JAK1	Janus Kinase 1	Protein Coding	P23458	61	GC01M064833	43.8045	https://www.genecards.org/cgi-bin/carddisp.pl?gene=JAK1
APC	APC Regulator Of WNT Signaling Pathway	Protein Coding	P25054	56	GC05P112707	43.8027	https://www.genecards.org/cgi-bin/carddisp.pl?gene=APC
STIM1	Stromal Interaction Molecule 1	Protein Coding	Q13586	56	GC11P004268	43.7519	https://www.genecards.org/cgi-bin/carddisp.pl?gene=STIM1
WT1	WT1 Transcription Factor	Protein Coding	P19544	55	GC11M032365	43.5466	https://www.genecards.org/cgi-bin/carddisp.pl?gene=WT1
TIGIT	T Cell Immunoreceptor With Ig And ITIM Domains	Protein Coding	Q495A1	46	GC03P114276	43.4973	https://www.genecards.org/cgi-bin/carddisp.pl?gene=TIGIT
ORAI1	ORAI Calcium Release-Activated Calcium Modulator 1	Protein Coding	Q96D31	51	GC12P128232	43.4306	https://www.genecards.org/cgi-bin/carddisp.pl?gene=ORAI1
DNMT1	DNA Methyltransferase 1	Protein Coding	P26358	59	GC19M010133	43.1946	https://www.genecards.org/cgi-bin/carddisp.pl?gene=DNMT1
IFNA1	Interferon Alpha 1	Protein Coding	P01562	46	GC09P021647	43.0439	https://www.genecards.org/cgi-bin/carddisp.pl?gene=IFNA1
PRKCQ	Protein Kinase C Theta	Protein Coding	Q04759	55	GC10M006703	43.0337	https://www.genecards.org/cgi-bin/carddisp.pl?gene=PRKCQ
CD69	CD69 Molecule	Protein Coding	Q07108	49	GC12M024897	42.9813	https://www.genecards.org/cgi-bin/carddisp.pl?gene=CD69
IL1A	Interleukin 1 Alpha	Protein Coding	P01583	52	GC02M112773	42.9704	https://www.genecards.org/cgi-bin/carddisp.pl?gene=IL1A
TNFRSF4	TNF Receptor Superfamily Member 4	Protein Coding	P43489	50	GC01M001211	42.9412	https://www.genecards.org/cgi-bin/carddisp.pl?gene=TNFRSF4
CD79A	CD79a Molecule	Protein Coding	P11912	54	GC19P041877	42.9294	https://www.genecards.org/cgi-bin/carddisp.pl?gene=CD79A
NFATC4	Nuclear Factor Of Activated T Cells 4	Protein Coding	Q14934	50	GC14P024365	42.9287	https://www.genecards.org/cgi-bin/carddisp.pl?gene=NFATC4
GATA1	GATA Binding Protein 1	Protein Coding	P15976	53	GC0XP048786	42.9195	https://www.genecards.org/cgi-bin/carddisp.pl?gene=GATA1
LIG4	DNA Ligase 4	Protein Coding	P49917	54	GC13M108207	42.9083	https://www.genecards.org/cgi-bin/carddisp.pl?gene=LIG4
SETD2	SET Domain Containing 2, Histone Lysine Methyltransferase	Protein Coding	Q9BYW2	54	GC03M047033	42.8277	https://www.genecards.org/cgi-bin/carddisp.pl?gene=SETD2
MCL1	MCL1 Apoptosis Regulator, BCL2 Family Member	Protein Coding	Q07820	54	GC01M155854	42.8171	https://www.genecards.org/cgi-bin/carddisp.pl?gene=MCL1
SMARCA4	SWI/SNF Related, Matrix Associated, Actin Dependent Regulator Of Chromatin, Subfamily A, Member 4	Protein Coding	P51532	58	GC19P011131	42.7773	https://www.genecards.org/cgi-bin/carddisp.pl?gene=SMARCA4
DICER1	Dicer 1, Ribonuclease III	Protein Coding	Q9UPY3	55	GC14M095086	42.7496	https://www.genecards.org/cgi-bin/carddisp.pl?gene=DICER1
AR	Androgen Receptor	Protein Coding	P10275	58	GC0XP067544	42.7153	https://www.genecards.org/cgi-bin/carddisp.pl?gene=AR
CD70	CD70 Molecule	Protein Coding	P32970	50	GC19M009494	42.6894	https://www.genecards.org/cgi-bin/carddisp.pl?gene=CD70
KDR	Kinase Insert Domain Receptor	Protein Coding	P35968	60	GC04M055078	42.6274	https://www.genecards.org/cgi-bin/carddisp.pl?gene=KDR
VAV1	Vav Guanine Nucleotide Exchange Factor 1	Protein Coding	P15498	52	GC19P006772	42.5084	https://www.genecards.org/cgi-bin/carddisp.pl?gene=VAV1
PRKDC	Protein Kinase, DNA-Activated, Catalytic Subunit	Protein Coding	P78527	57	GC08M047773	42.4718	https://www.genecards.org/cgi-bin/carddisp.pl?gene=PRKDC
CCR4	C-C Motif Chemokine Receptor 4	Protein Coding	P51679	52	GC03P032951	42.4095	https://www.genecards.org/cgi-bin/carddisp.pl?gene=CCR4
TCF7	Transcription Factor 7	Protein Coding	P36402	49	GC05P134115	42.3565	https://www.genecards.org/cgi-bin/carddisp.pl?gene=TCF7
IL12RB1	Interleukin 12 Receptor Subunit Beta 1	Protein Coding	P42701	52	GC19M018058	42.2836	https://www.genecards.org/cgi-bin/carddisp.pl?gene=IL12RB1
MLH1	MutL Homolog 1	Protein Coding	P40692	56	GC03P036993	42.2406	https://www.genecards.org/cgi-bin/carddisp.pl?gene=MLH1
HLA-DQB1	Major Histocompatibility Complex, Class II, DQ Beta 1	Protein Coding	P01920	49	GC06M080978	42.2139	https://www.genecards.org/cgi-bin/carddisp.pl?gene=HLA-DQB1
CDK6	Cyclin Dependent Kinase 6	Protein Coding	Q00534	58	GC07M092604	42.185	https://www.genecards.org/cgi-bin/carddisp.pl?gene=CDK6
PTPN6	Protein Tyrosine Phosphatase Non-Receptor Type 6	Protein Coding	P29350	56	GC12P028322	42.1506	https://www.genecards.org/cgi-bin/carddisp.pl?gene=PTPN6
MAPK3	Mitogen-Activated Protein Kinase 3	Protein Coding	P27361	56	GC16M040839	42.1258	https://www.genecards.org/cgi-bin/carddisp.pl?gene=MAPK3
PGM3	Phosphoglucomutase 3	Protein Coding	O95394	50	GC06M083178	42.0308	https://www.genecards.org/cgi-bin/carddisp.pl?gene=PGM3
TRD	T Cell Receptor Delta Locus	Protein Coding		14	GC14P038369	42.0181	https://www.genecards.org/cgi-bin/carddisp.pl?gene=TRD
EGF	Epidermal Growth Factor	Protein Coding	P01133	58	GC04P109912	41.9846	https://www.genecards.org/cgi-bin/carddisp.pl?gene=EGF
IGH	Immunoglobulin Heavy Locus	Protein Coding		21	GC14M115494	41.8292	https://www.genecards.org/cgi-bin/carddisp.pl?gene=IGH
PECAM1	Platelet And Endothelial Cell Adhesion Molecule 1	Protein Coding	P16284	48	GC17M064319	41.7615	https://www.genecards.org/cgi-bin/carddisp.pl?gene=PECAM1
RFX5	Regulatory Factor X5	Protein Coding	P48382	50	GC01M151340	41.7021	https://www.genecards.org/cgi-bin/carddisp.pl?gene=RFX5
TNFRSF8	TNF Receptor Superfamily Member 8	Protein Coding	P28908	50	GC01P012063	41.684	https://www.genecards.org/cgi-bin/carddisp.pl?gene=TNFRSF8
TSC2	TSC Complex Subunit 2	Protein Coding	P49815	57	GC16P045943	41.6549	https://www.genecards.org/cgi-bin/carddisp.pl?gene=TSC2
SLC2A1	Solute Carrier Family 2 Member 1	Protein Coding	P11166	60	GC01M042925	41.5357	https://www.genecards.org/cgi-bin/carddisp.pl?gene=SLC2A1
CCL3	C-C Motif Chemokine Ligand 3	Protein Coding	P10147	46	GC17M036088	41.4718	https://www.genecards.org/cgi-bin/carddisp.pl?gene=CCL3
TNFRSF1A	TNF Receptor Superfamily Member 1A	Protein Coding	P19438	57	GC12M006328	41.4278	https://www.genecards.org/cgi-bin/carddisp.pl?gene=TNFRSF1A
BIRC5	Baculoviral IAP Repeat Containing 5	Protein Coding	O15392	52	GC17P078214	41.3631	https://www.genecards.org/cgi-bin/carddisp.pl?gene=BIRC5
RET	Ret Proto-Oncogene	Protein Coding	P07949	61	GC10P043402	41.3353	https://www.genecards.org/cgi-bin/carddisp.pl?gene=RET
CD34	CD34 Molecule	Protein Coding	P28906	52	GC01M207880	41.1796	https://www.genecards.org/cgi-bin/carddisp.pl?gene=CD34
CORO1A	Coronin 1A	Protein Coding	P31146	50	GC16P047726	41.1636	https://www.genecards.org/cgi-bin/carddisp.pl?gene=CORO1A
PDGFRA	Platelet Derived Growth Factor Receptor Alpha	Protein Coding	P16234	60	GC04P054229	40.9362	https://www.genecards.org/cgi-bin/carddisp.pl?gene=PDGFRA
CASP9	Caspase 9	Protein Coding	P55211	54	GC01M015491	40.9325	https://www.genecards.org/cgi-bin/carddisp.pl?gene=CASP9
TNNT2	Troponin T2, Cardiac Type	Protein Coding	P45379	54	GC01M201359	40.8869	https://www.genecards.org/cgi-bin/carddisp.pl?gene=TNNT2
REL	REL Proto-Oncogene, NF-KB Subunit	Protein Coding	Q04864	53	GC02P060881	40.7829	https://www.genecards.org/cgi-bin/carddisp.pl?gene=REL
CD7	CD7 Molecule	Protein Coding	P09564	45	GC17M082314	40.6853	https://www.genecards.org/cgi-bin/carddisp.pl?gene=CD7
CDC42	Cell Division Cycle 42	Protein Coding	P60953	58	GC01P022052	40.6635	https://www.genecards.org/cgi-bin/carddisp.pl?gene=CDC42
NFKB2	Nuclear Factor Kappa B Subunit 2	Protein Coding	Q00653	59	GC10P102394	40.5981	https://www.genecards.org/cgi-bin/carddisp.pl?gene=NFKB2
IL18	Interleukin 18	Protein Coding	Q14116	50	GC11M112143	40.5527	https://www.genecards.org/cgi-bin/carddisp.pl?gene=IL18
MMP9	Matrix Metallopeptidase 9	Protein Coding	P14780	60	GC20P046008	40.5159	https://www.genecards.org/cgi-bin/carddisp.pl?gene=MMP9
SOCS1	Suppressor Of Cytokine Signaling 1	Protein Coding	O15524	52	GC16M013141	40.4804	https://www.genecards.org/cgi-bin/carddisp.pl?gene=SOCS1
VTCN1	V-Set Domain Containing T Cell Activation Inhibitor 1	Protein Coding	Q7Z7D3	48	GC01M117143	40.4264	https://www.genecards.org/cgi-bin/carddisp.pl?gene=VTCN1
CDK1	Cyclin Dependent Kinase 1	Protein Coding	P06493	55	GC10P060772	40.4185	https://www.genecards.org/cgi-bin/carddisp.pl?gene=CDK1
IGF1	Insulin Like Growth Factor 1	Protein Coding	P05019	55	GC12M102395	40.4089	https://www.genecards.org/cgi-bin/carddisp.pl?gene=IGF1
MUC1	Mucin 1, Cell Surface Associated	Protein Coding	P15941	55	GC01M155185	40.3857	https://www.genecards.org/cgi-bin/carddisp.pl?gene=MUC1
HDAC1	Histone Deacetylase 1	Protein Coding	Q13547	57	GC01P032292	40.2689	https://www.genecards.org/cgi-bin/carddisp.pl?gene=HDAC1
WIPF1	WAS/WASL Interacting Protein Family Member 1	Protein Coding	O43516	49	GC02M174559	40.2634	https://www.genecards.org/cgi-bin/carddisp.pl?gene=WIPF1
LRRC56	Leucine Rich Repeat Containing 56	Protein Coding	Q8IYG6	42	GC11P002827	40.2258	https://www.genecards.org/cgi-bin/carddisp.pl?gene=LRRC56
MAGT1	Magnesium Transporter 1	Protein Coding	Q9H0U3	48	GC0XM078117	40.0122	https://www.genecards.org/cgi-bin/carddisp.pl?gene=MAGT1
CDKN2B	Cyclin Dependent Kinase Inhibitor 2B	Protein Coding	P42772	53	GC09M022002	39.9569	https://www.genecards.org/cgi-bin/carddisp.pl?gene=CDKN2B
IKZF3	IKAROS Family Zinc Finger 3	Protein Coding	Q9UKT9	49	GC17M060752	39.8864	https://www.genecards.org/cgi-bin/carddisp.pl?gene=IKZF3
SF3B1	Splicing Factor 3b Subunit 1	Protein Coding	O75533	52	GC02M197453	39.8683	https://www.genecards.org/cgi-bin/carddisp.pl?gene=SF3B1
MYH7	Myosin Heavy Chain 7	Protein Coding	P12883	53	GC14M023412	39.8682	https://www.genecards.org/cgi-bin/carddisp.pl?gene=MYH7
FGF2	Fibroblast Growth Factor 2	Protein Coding	P09038	52	GC04P122826	39.8398	https://www.genecards.org/cgi-bin/carddisp.pl?gene=FGF2
PRKCA	Protein Kinase C Alpha	Protein Coding	P17252	57	GC17P066302	39.825	https://www.genecards.org/cgi-bin/carddisp.pl?gene=PRKCA
SF3B2	Splicing Factor 3b Subunit 2	Protein Coding	Q13435	48	GC11P066050	39.772	https://www.genecards.org/cgi-bin/carddisp.pl?gene=SF3B2
SMARCB1	SWI/SNF Related, Matrix Associated, Actin Dependent Regulator Of Chromatin, Subfamily B, Member 1	Protein Coding	Q12824	53	GC22P023786	39.6658	https://www.genecards.org/cgi-bin/carddisp.pl?gene=SMARCB1
RFXANK	Regulatory Factor X Associated Ankyrin Containing Protein	Protein Coding	O14593	48	GC19P019192	39.6577	https://www.genecards.org/cgi-bin/carddisp.pl?gene=RFXANK
BACH2	BTB Domain And CNC Homolog 2	Protein Coding	Q9BYV9	50	GC06M089926	39.6361	https://www.genecards.org/cgi-bin/carddisp.pl?gene=BACH2
IL4R	Interleukin 4 Receptor	Protein Coding	P24394	54	GC16P046806	39.5666	https://www.genecards.org/cgi-bin/carddisp.pl?gene=IL4R
CAV1	Caveolin 1	Protein Coding	Q03135	55	GC07P116524	39.5033	https://www.genecards.org/cgi-bin/carddisp.pl?gene=CAV1
PCNA	Proliferating Cell Nuclear Antigen	Protein Coding	P12004	57	GC20M005114	39.4217	https://www.genecards.org/cgi-bin/carddisp.pl?gene=PCNA
PPP2R1A	Protein Phosphatase 2 Scaffold Subunit Aalpha	Protein Coding	P30153	55	GC19P083787	39.4058	https://www.genecards.org/cgi-bin/carddisp.pl?gene=PPP2R1A
TBX5	T-Box Transcription Factor 5	Protein Coding	Q99593	52	GC12M114353	39.3957	https://www.genecards.org/cgi-bin/carddisp.pl?gene=TBX5
CD209	CD209 Molecule	Protein Coding	Q9NNX6	50	GC19M007739	39.338	https://www.genecards.org/cgi-bin/carddisp.pl?gene=CD209
EZH2	Enhancer Of Zeste 2 Polycomb Repressive Complex 2 Subunit	Protein Coding	Q15910	60	GC07M148807	39.2559	https://www.genecards.org/cgi-bin/carddisp.pl?gene=EZH2
PTK2	Protein Tyrosine Kinase 2	Protein Coding	Q05397	54	GC08M140657	39.2494	https://www.genecards.org/cgi-bin/carddisp.pl?gene=PTK2
NOS3	Nitric Oxide Synthase 3	Protein Coding	P29474	56	GC07P152342	39.2031	https://www.genecards.org/cgi-bin/carddisp.pl?gene=NOS3
TNFRSF13B	TNF Receptor Superfamily Member 13B	Protein Coding	O14836	53	GC17M016929	39.136	https://www.genecards.org/cgi-bin/carddisp.pl?gene=TNFRSF13B
NF1	Neurofibromin 1	Protein Coding	P21359	54	GC17P031094	39.1015	https://www.genecards.org/cgi-bin/carddisp.pl?gene=NF1
KMT2D	Lysine Methyltransferase 2D	Protein Coding	O14686	50	GC12M049018	39.0089	https://www.genecards.org/cgi-bin/carddisp.pl?gene=KMT2D
TLR2	Toll Like Receptor 2	Protein Coding	O60603	58	GC04P153684	39.0078	https://www.genecards.org/cgi-bin/carddisp.pl?gene=TLR2
ZBTB16	Zinc Finger And BTB Domain Containing 16	Protein Coding	Q05516	50	GC11P114059	39.006	https://www.genecards.org/cgi-bin/carddisp.pl?gene=ZBTB16
TLR4	Toll Like Receptor 4	Protein Coding	O00206	58	GC09P117704	38.8821	https://www.genecards.org/cgi-bin/carddisp.pl?gene=TLR4
CEACAM5	CEA Cell Adhesion Molecule 5	Protein Coding	P06731	50	GC19P083353	38.8802	https://www.genecards.org/cgi-bin/carddisp.pl?gene=CEACAM5
FADD	Fas Associated Via Death Domain	Protein Coding	Q13158	53	GC11P070203	38.8565	https://www.genecards.org/cgi-bin/carddisp.pl?gene=FADD
GRB2	Growth Factor Receptor Bound Protein 2	Protein Coding	P62993	53	GC17M075318	38.7537	https://www.genecards.org/cgi-bin/carddisp.pl?gene=GRB2
IL6ST	Interleukin 6 Cytokine Family Signal Transducer	Protein Coding	P40189	56	GC05M055935	38.7016	https://www.genecards.org/cgi-bin/carddisp.pl?gene=IL6ST
PTK2B	Protein Tyrosine Kinase 2 Beta	Protein Coding	Q14289	56	GC08P027311	38.6628	https://www.genecards.org/cgi-bin/carddisp.pl?gene=PTK2B
TNFRSF10B	TNF Receptor Superfamily Member 10b	Protein Coding	O14763	57	GC08M023020	38.6344	https://www.genecards.org/cgi-bin/carddisp.pl?gene=TNFRSF10B
SPP1	Secreted Phosphoprotein 1	Protein Coding	P10451	52	GC04P087975	38.6326	https://www.genecards.org/cgi-bin/carddisp.pl?gene=SPP1
PTCRA	Pre T Cell Antigen Receptor Alpha	Protein Coding	Q6ISU1	44	GC06P042915	38.624	https://www.genecards.org/cgi-bin/carddisp.pl?gene=PTCRA
IRF3	Interferon Regulatory Factor 3	Protein Coding	Q14653	51	GC19M049659	38.6124	https://www.genecards.org/cgi-bin/carddisp.pl?gene=IRF3
CSF1	Colony Stimulating Factor 1	Protein Coding	P09603	51	GC01P109911	38.5068	https://www.genecards.org/cgi-bin/carddisp.pl?gene=CSF1
TNFAIP3	TNF Alpha Induced Protein 3	Protein Coding	P21580	54	GC06P137866	38.5005	https://www.genecards.org/cgi-bin/carddisp.pl?gene=TNFAIP3
TSC1	TSC Complex Subunit 1	Protein Coding	Q92574	54	GC09M132891	38.4379	https://www.genecards.org/cgi-bin/carddisp.pl?gene=TSC1
TIA1	TIA1 Cytotoxic Granule Associated RNA Binding Protein	Protein Coding	P31483	49	GC02M070209	38.3969	https://www.genecards.org/cgi-bin/carddisp.pl?gene=TIA1
ETS1	ETS Proto-Oncogene 1, Transcription Factor	Protein Coding	P14921	54	GC11M128458	38.3007	https://www.genecards.org/cgi-bin/carddisp.pl?gene=ETS1
PDGFRB	Platelet Derived Growth Factor Receptor Beta	Protein Coding	P09619	60	GC05M150113	38.2962	https://www.genecards.org/cgi-bin/carddisp.pl?gene=PDGFRB
LYN	LYN Proto-Oncogene, Src Family Tyrosine Kinase	Protein Coding	P07948	55	GC08P055879	38.2176	https://www.genecards.org/cgi-bin/carddisp.pl?gene=LYN
IL9	Interleukin 9	Protein Coding	P15248	49	GC05M135891	38.2132	https://www.genecards.org/cgi-bin/carddisp.pl?gene=IL9
UNC119	Unc-119 Lipid Binding Chaperone	Protein Coding	Q13432	49	GC17M028546	38.1354	https://www.genecards.org/cgi-bin/carddisp.pl?gene=UNC119
MSN	Moesin	Protein Coding	P26038	54	GC0XP065588	38.0919	https://www.genecards.org/cgi-bin/carddisp.pl?gene=MSN
CSF3	Colony Stimulating Factor 3	Protein Coding	P09919	47	GC17P040015	38.083	https://www.genecards.org/cgi-bin/carddisp.pl?gene=CSF3
FOXO1	Forkhead Box O1	Protein Coding	Q12778	58	GC13M040555	38.0811	https://www.genecards.org/cgi-bin/carddisp.pl?gene=FOXO1
CD81	CD81 Molecule	Protein Coding	P60033	53	GC11P002963	37.9887	https://www.genecards.org/cgi-bin/carddisp.pl?gene=CD81
CXCL10	C-X-C Motif Chemokine Ligand 10	Protein Coding	P02778	51	GC04M076021	37.9782	https://www.genecards.org/cgi-bin/carddisp.pl?gene=CXCL10
MS4A1	Membrane Spanning 4-Domains A1	Protein Coding	P11836	54	GC11P060545	37.7892	https://www.genecards.org/cgi-bin/carddisp.pl?gene=MS4A1
PTPN22	Protein Tyrosine Phosphatase Non-Receptor Type 22	Protein Coding	Q9Y2R2	53	GC01M113813	37.6628	https://www.genecards.org/cgi-bin/carddisp.pl?gene=PTPN22
NUP214	Nucleoporin 214	Protein Coding	P35658	52	GC09P131125	37.6584	https://www.genecards.org/cgi-bin/carddisp.pl?gene=NUP214
CD46	CD46 Molecule	Protein Coding	P15529	54	GC01P207752	37.6551	https://www.genecards.org/cgi-bin/carddisp.pl?gene=CD46
SLAMF1	Signaling Lymphocytic Activation Molecule Family Member 1	Protein Coding	Q13291	48	GC01M160608	37.6233	https://www.genecards.org/cgi-bin/carddisp.pl?gene=SLAMF1
NOS2	Nitric Oxide Synthase 2	Protein Coding	P35228	56	GC17M027756	37.5929	https://www.genecards.org/cgi-bin/carddisp.pl?gene=NOS2
STAT4	Signal Transducer And Activator Of Transcription 4	Protein Coding	Q14765	53	GC02M191029	37.5728	https://www.genecards.org/cgi-bin/carddisp.pl?gene=STAT4
ERBB4	Erb-B2 Receptor Tyrosine Kinase 4	Protein Coding	Q15303	61	GC02M211375	37.5574	https://www.genecards.org/cgi-bin/carddisp.pl?gene=ERBB4
CNTN2	Contactin 2	Protein Coding	Q02246	52	GC01P205043	37.5017	https://www.genecards.org/cgi-bin/carddisp.pl?gene=CNTN2
MSH2	MutS Homolog 2	Protein Coding	P43246	56	GC02P047403	37.4689	https://www.genecards.org/cgi-bin/carddisp.pl?gene=MSH2
APOE	Apolipoprotein E	Protein Coding	P02649	57	GC19P083472	37.4637	https://www.genecards.org/cgi-bin/carddisp.pl?gene=APOE
AURKA	Aurora Kinase A	Protein Coding	O14965	58	GC20M056370	37.463	https://www.genecards.org/cgi-bin/carddisp.pl?gene=AURKA
TUG1	Taurine Up-Regulated 1	Protein Coding	A0A6I8PU40	26	GC22P030969	37.4188	https://www.genecards.org/cgi-bin/carddisp.pl?gene=TUG1
HSP90AA1	Heat Shock Protein 90 Alpha Family Class A Member 1	Protein Coding	P07900	58	GC14M102080	37.2896	https://www.genecards.org/cgi-bin/carddisp.pl?gene=HSP90AA1
PARP1	Poly(ADP-Ribose) Polymerase 1	Protein Coding	P09874	57	GC01M226360	37.2486	https://www.genecards.org/cgi-bin/carddisp.pl?gene=PARP1
IL6R	Interleukin 6 Receptor	Protein Coding	P08887	57	GC01P154405	37.2455	https://www.genecards.org/cgi-bin/carddisp.pl?gene=IL6R
SELE	Selectin E	Protein Coding	P16581	50	GC01M169722	37.2198	https://www.genecards.org/cgi-bin/carddisp.pl?gene=SELE
MTHFR	Methylenetetrahydrofolate Reductase	Protein Coding	P42898	54	GC01M011785	37.2046	https://www.genecards.org/cgi-bin/carddisp.pl?gene=MTHFR
CCND3	Cyclin D3	Protein Coding	P30281	53	GC06M041934	37.1545	https://www.genecards.org/cgi-bin/carddisp.pl?gene=CCND3
VIM	Vimentin	Protein Coding	P08670	58	GC10P017227	37.1457	https://www.genecards.org/cgi-bin/carddisp.pl?gene=VIM
PLCG2	Phospholipase C Gamma 2	Protein Coding	P16885	58	GC16P081773	37.1169	https://www.genecards.org/cgi-bin/carddisp.pl?gene=PLCG2
TNFSF11	TNF Superfamily Member 11	Protein Coding	O14788	56	GC13P042562	37.0976	https://www.genecards.org/cgi-bin/carddisp.pl?gene=TNFSF11
PALB2	Partner And Localizer Of BRCA2	Protein Coding	Q86YC2	51	GC16M023603	37.0906	https://www.genecards.org/cgi-bin/carddisp.pl?gene=PALB2
CCND2	Cyclin D2	Protein Coding	P30279	55	GC12P028136	37.0799	https://www.genecards.org/cgi-bin/carddisp.pl?gene=CCND2
PTCH1	Patched 1	Protein Coding	Q13635	58	GC09M095442	37.0615	https://www.genecards.org/cgi-bin/carddisp.pl?gene=PTCH1
MITF	Melanocyte Inducing Transcription Factor	Protein Coding	O75030	55	GC03P069740	37.0062	https://www.genecards.org/cgi-bin/carddisp.pl?gene=MITF
SOS1	SOS Ras/Rac Guanine Nucleotide Exchange Factor 1	Protein Coding	Q07889	57	GC02M039125	36.9569	https://www.genecards.org/cgi-bin/carddisp.pl?gene=SOS1
SHH	Sonic Hedgehog Signaling Molecule	Protein Coding	Q15465	57	GC07M155799	36.9267	https://www.genecards.org/cgi-bin/carddisp.pl?gene=SHH
SHC1	SHC Adaptor Protein 1	Protein Coding	P29353	50	GC01M154962	36.91	https://www.genecards.org/cgi-bin/carddisp.pl?gene=SHC1
RUNX1T1	RUNX1 Partner Transcriptional Co-Repressor 1	Protein Coding	Q06455	48	GC08M091954	36.7372	https://www.genecards.org/cgi-bin/carddisp.pl?gene=RUNX1T1
ARPC1B	Actin Related Protein 2/3 Complex Subunit 1B	Protein Coding	O15143	50	GC07P099374	36.6948	https://www.genecards.org/cgi-bin/carddisp.pl?gene=ARPC1B
PIK3CB	Phosphatidylinositol-4,5-Bisphosphate 3-Kinase Catalytic Subunit Beta	Protein Coding	P42338	54	GC03M138652	36.6477	https://www.genecards.org/cgi-bin/carddisp.pl?gene=PIK3CB
CCL4	C-C Motif Chemokine Ligand 4	Protein Coding	P13236	46	GC17P036103	36.6433	https://www.genecards.org/cgi-bin/carddisp.pl?gene=CCL4
BIRC3	Baculoviral IAP Repeat Containing 3	Protein Coding	Q13489	53	GC11P102317	36.5974	https://www.genecards.org/cgi-bin/carddisp.pl?gene=BIRC3
HDAC9	Histone Deacetylase 9	Protein Coding	Q9UKV0	56	GC07P018086	36.5771	https://www.genecards.org/cgi-bin/carddisp.pl?gene=HDAC9
CFTR	CF Transmembrane Conductance Regulator	Protein Coding	P13569	58	GC07P117287	36.5156	https://www.genecards.org/cgi-bin/carddisp.pl?gene=CFTR
HPS1	HPS1 Biogenesis Of Lysosomal Organelles Complex 3 Subunit 1	Protein Coding	Q92902	48	GC10M098410	36.4918	https://www.genecards.org/cgi-bin/carddisp.pl?gene=HPS1
HLA-DPB1	Major Histocompatibility Complex, Class II, DP Beta 1	Protein Coding	P04440	52	GC06P104135	36.4769	https://www.genecards.org/cgi-bin/carddisp.pl?gene=HLA-DPB1
MSH6	MutS Homolog 6	Protein Coding	P52701	56	GC02P047695	36.4509	https://www.genecards.org/cgi-bin/carddisp.pl?gene=MSH6
TP63	Tumor Protein P63	Protein Coding	Q9H3D4	53	GC03P189598	36.3965	https://www.genecards.org/cgi-bin/carddisp.pl?gene=TP63
ARID1A	AT-Rich Interaction Domain 1A	Protein Coding	O14497	52	GC01P026693	36.3895	https://www.genecards.org/cgi-bin/carddisp.pl?gene=ARID1A
RELB	RELB Proto-Oncogene, NF-KB Subunit	Protein Coding	Q01201	52	GC19P083476	36.354	https://www.genecards.org/cgi-bin/carddisp.pl?gene=RELB
DOCK2	Dedicator Of Cytokinesis 2	Protein Coding	Q92608	51	GC05P169637	36.3406	https://www.genecards.org/cgi-bin/carddisp.pl?gene=DOCK2
ENG	Endoglin	Protein Coding	P17813	55	GC09M127815	36.3276	https://www.genecards.org/cgi-bin/carddisp.pl?gene=ENG
NR3C1	Nuclear Receptor Subfamily 3 Group C Member 1	Protein Coding	P04150	56	GC05M143277	36.3229	https://www.genecards.org/cgi-bin/carddisp.pl?gene=NR3C1
TCF7L2	Transcription Factor 7 Like 2	Protein Coding	Q9NQB0	53	GC10P112950	36.3019	https://www.genecards.org/cgi-bin/carddisp.pl?gene=TCF7L2
NHEJ1	Non-Homologous End Joining Factor 1	Protein Coding	Q9H9Q4	48	GC02M219148	36.2619	https://www.genecards.org/cgi-bin/carddisp.pl?gene=NHEJ1
IDH1	Isocitrate Dehydrogenase (NADP(+)) 1	Protein Coding	O75874	60	GC02M208236	36.2343	https://www.genecards.org/cgi-bin/carddisp.pl?gene=IDH1
MMP2	Matrix Metallopeptidase 2	Protein Coding	P08253	60	GC16P055390	36.2339	https://www.genecards.org/cgi-bin/carddisp.pl?gene=MMP2
HMGB1	High Mobility Group Box 1	Protein Coding	P09429	55	GC13M030456	36.2183	https://www.genecards.org/cgi-bin/carddisp.pl?gene=HMGB1
IDO1	Indoleamine 2,3-Dioxygenase 1	Protein Coding	P14902	53	GC08P039891	36.1987	https://www.genecards.org/cgi-bin/carddisp.pl?gene=IDO1
CEBPA	CCAAT Enhancer Binding Protein Alpha	Protein Coding	P49715	53	GC19M033299	36.1595	https://www.genecards.org/cgi-bin/carddisp.pl?gene=CEBPA
CYCS	Cytochrome C, Somatic	Protein Coding	P99999	55	GC07M025118	36.1155	https://www.genecards.org/cgi-bin/carddisp.pl?gene=CYCS
FCGR3A	Fc Gamma Receptor IIIa	Protein Coding	P08637	53	GC01M161541	36.1024	https://www.genecards.org/cgi-bin/carddisp.pl?gene=FCGR3A
LAT2	Linker For Activation Of T Cells Family Member 2	Protein Coding	Q9GZY6	45	GC07P074199	36.0782	https://www.genecards.org/cgi-bin/carddisp.pl?gene=LAT2
CHUK	Component Of Inhibitor Of Nuclear Factor Kappa B Kinase Complex	Protein Coding	O15111	57	GC10M100296	36.0728	https://www.genecards.org/cgi-bin/carddisp.pl?gene=CHUK
CFLAR	CASP8 And FADD Like Apoptosis Regulator	Protein Coding	O15519	51	GC02P201341	36.0716	https://www.genecards.org/cgi-bin/carddisp.pl?gene=CFLAR
STXBP2	Syntaxin Binding Protein 2	Protein Coding	Q15833	52	GC19P008072	36.0679	https://www.genecards.org/cgi-bin/carddisp.pl?gene=STXBP2
PBX1	PBX Homeobox 1	Protein Coding	P40424	55	GC01P164524	36.0165	https://www.genecards.org/cgi-bin/carddisp.pl?gene=PBX1
SPI1	Spi-1 Proto-Oncogene	Protein Coding	P17947	50	GC11M108878	36.0114	https://www.genecards.org/cgi-bin/carddisp.pl?gene=SPI1
PTGS2	Prostaglandin-Endoperoxide Synthase 2	Protein Coding	P35354	56	GC01M186671	36.0005	https://www.genecards.org/cgi-bin/carddisp.pl?gene=PTGS2
GNAS	GNAS Complex Locus	Protein Coding	P84996	57	GC20P058839	35.9928	https://www.genecards.org/cgi-bin/carddisp.pl?gene=GNAS
CEACAM1	CEA Cell Adhesion Molecule 1	Protein Coding	P13688	52	GC19M042507	35.8596	https://www.genecards.org/cgi-bin/carddisp.pl?gene=CEACAM1
RFXAP	Regulatory Factor X Associated Protein	Protein Coding	O00287	43	GC13P036819	35.8463	https://www.genecards.org/cgi-bin/carddisp.pl?gene=RFXAP
LEF1	Lymphoid Enhancer Binding Factor 1	Protein Coding	Q9UJU2	55	GC04M108047	35.8016	https://www.genecards.org/cgi-bin/carddisp.pl?gene=LEF1
MECOM	MDS1 And EVI1 Complex Locus	Protein Coding	Q03112	54	GC03M169083	35.7559	https://www.genecards.org/cgi-bin/carddisp.pl?gene=MECOM
HNF1A	HNF1 Homeobox A	Protein Coding	P20823	53	GC12P120978	35.6923	https://www.genecards.org/cgi-bin/carddisp.pl?gene=HNF1A
DHFR	Dihydrofolate Reductase	Protein Coding	P00374	55	GC05M080626	35.6414	https://www.genecards.org/cgi-bin/carddisp.pl?gene=DHFR
CD244	CD244 Molecule	Protein Coding	Q9BZW8	50	GC01M160830	35.5634	https://www.genecards.org/cgi-bin/carddisp.pl?gene=CD244
IL21R	Interleukin 21 Receptor	Protein Coding	Q9HBE5	50	GC16P046809	35.5117	https://www.genecards.org/cgi-bin/carddisp.pl?gene=IL21R
HLA-DQA1	Major Histocompatibility Complex, Class II, DQ Alpha 1	Protein Coding	P01909	49	GC06P104128	35.5011	https://www.genecards.org/cgi-bin/carddisp.pl?gene=HLA-DQA1
CSF3R	Colony Stimulating Factor 3 Receptor	Protein Coding	Q99062	54	GC01M036466	35.4606	https://www.genecards.org/cgi-bin/carddisp.pl?gene=CSF3R
RUNX2	RUNX Family Transcription Factor 2	Protein Coding	Q13950	53	GC06P104322	35.4483	https://www.genecards.org/cgi-bin/carddisp.pl?gene=RUNX2
PRCC	Proline Rich Mitotic Checkpoint Control Factor	Protein Coding	Q92733	46	GC01P156750	35.4148	https://www.genecards.org/cgi-bin/carddisp.pl?gene=PRCC
ANXA5	Annexin A5	Protein Coding	P08758	53	GC04M121667	35.4018	https://www.genecards.org/cgi-bin/carddisp.pl?gene=ANXA5
TRAT1	T Cell Receptor Associated Transmembrane Adaptor 1	Protein Coding	Q6PIZ9	42	GC03P108823	35.2538	https://www.genecards.org/cgi-bin/carddisp.pl?gene=TRAT1
KLRD1	Killer Cell Lectin Like Receptor D1	Protein Coding	Q13241	48	GC12P010226	35.2483	https://www.genecards.org/cgi-bin/carddisp.pl?gene=KLRD1
LEPR	Leptin Receptor	Protein Coding	P48357	57	GC01P065426	35.2362	https://www.genecards.org/cgi-bin/carddisp.pl?gene=LEPR
HLA-DRA	Major Histocompatibility Complex, Class II, DR Alpha	Protein Coding	P01903	52	GC06P032439	35.2216	https://www.genecards.org/cgi-bin/carddisp.pl?gene=HLA-DRA
LMO2	LIM Domain Only 2	Protein Coding	P25791	48	GC11M033858	35.2067	https://www.genecards.org/cgi-bin/carddisp.pl?gene=LMO2
MBP	Myelin Basic Protein	Protein Coding	P02686	51	GC18M076978	35.2018	https://www.genecards.org/cgi-bin/carddisp.pl?gene=MBP
IL12B	Interleukin 12B	Protein Coding	P29460	52	GC05M159314	35.1748	https://www.genecards.org/cgi-bin/carddisp.pl?gene=IL12B
SMARCAL1	SWI/SNF Related, Matrix Associated, Actin Dependent Regulator Of Chromatin, Subfamily A Like 1	Protein Coding	Q9NZC9	52	GC02P216412	35.161	https://www.genecards.org/cgi-bin/carddisp.pl?gene=SMARCAL1
IFNB1	Interferon Beta 1	Protein Coding	P01574	49	GC09M021077	35.1497	https://www.genecards.org/cgi-bin/carddisp.pl?gene=IFNB1
CD55	CD55 Molecule (Cromer Blood Group)	Protein Coding	P08174	56	GC01P207321	35.0859	https://www.genecards.org/cgi-bin/carddisp.pl?gene=CD55
NLRP3	NLR Family Pyrin Domain Containing 3	Protein Coding	Q96P20	55	GC01P247415	35.0542	https://www.genecards.org/cgi-bin/carddisp.pl?gene=NLRP3
SDHB	Succinate Dehydrogenase Complex Iron Sulfur Subunit B	Protein Coding	P21912	55	GC01M018664	35.048	https://www.genecards.org/cgi-bin/carddisp.pl?gene=SDHB
SMAD3	SMAD Family Member 3	Protein Coding	P84022	60	GC15P067063	35.0267	https://www.genecards.org/cgi-bin/carddisp.pl?gene=SMAD3
NRG1	Neuregulin 1	Protein Coding	Q02297	55	GC08P031639	35.0224	https://www.genecards.org/cgi-bin/carddisp.pl?gene=NRG1
ITGAM	Integrin Subunit Alpha M	Protein Coding	P11215	54	GC16P047820	35.0211	https://www.genecards.org/cgi-bin/carddisp.pl?gene=ITGAM
THY1	Thy-1 Cell Surface Antigen	Protein Coding	P04216	49	GC11M119424	34.923	https://www.genecards.org/cgi-bin/carddisp.pl?gene=THY1
CDKN3	Cyclin Dependent Kinase Inhibitor 3	Protein Coding	Q16667	48	GC14P054398	34.9148	https://www.genecards.org/cgi-bin/carddisp.pl?gene=CDKN3
CCL22	C-C Motif Chemokine Ligand 22	Protein Coding	O00626	44	GC16P057364	34.8642	https://www.genecards.org/cgi-bin/carddisp.pl?gene=CCL22
EOMES	Eomesodermin	Protein Coding	O95936	50	GC03M027715	34.8622	https://www.genecards.org/cgi-bin/carddisp.pl?gene=EOMES
TNFSF4	TNF Superfamily Member 4	Protein Coding	P23510	48	GC01M173183	34.8571	https://www.genecards.org/cgi-bin/carddisp.pl?gene=TNFSF4
TCIRG1	T Cell Immune Regulator 1, ATPase H+ Transporting V0 Subunit A3	Protein Coding	Q13488	52	GC11P073101	34.8402	https://www.genecards.org/cgi-bin/carddisp.pl?gene=TCIRG1
SOX9	SRY-Box Transcription Factor 9	Protein Coding	P48436	52	GC17P072121	34.7799	https://www.genecards.org/cgi-bin/carddisp.pl?gene=SOX9
EXTL3	Exostosin Like Glycosyltransferase 3	Protein Coding	O43909	50	GC08P028670	34.7697	https://www.genecards.org/cgi-bin/carddisp.pl?gene=EXTL3
TNFRSF18	TNF Receptor Superfamily Member 18	Protein Coding	Q9Y5U5	48	GC01M001203	34.7353	https://www.genecards.org/cgi-bin/carddisp.pl?gene=TNFRSF18
YAP1	Yes1 Associated Transcriptional Regulator	Protein Coding	P46937	54	GC11P102110	34.728	https://www.genecards.org/cgi-bin/carddisp.pl?gene=YAP1
TNFRSF13C	TNF Receptor Superfamily Member 13C	Protein Coding	Q96RJ3	52	GC22M068206	34.6777	https://www.genecards.org/cgi-bin/carddisp.pl?gene=TNFRSF13C
PML	PML Nuclear Body Scaffold	Protein Coding	P29590	53	GC15P073994	34.653	https://www.genecards.org/cgi-bin/carddisp.pl?gene=PML
SIRPA	Signal Regulatory Protein Alpha	Protein Coding	P78324	52	GC20P001894	34.5268	https://www.genecards.org/cgi-bin/carddisp.pl?gene=SIRPA
BMP6	Bone Morphogenetic Protein 6	Protein Coding	P22004	52	GC06P007726	34.5204	https://www.genecards.org/cgi-bin/carddisp.pl?gene=BMP6
IRF2BP2	Interferon Regulatory Factor 2 Binding Protein 2	Protein Coding	Q7Z5L9	44	GC01M234604	34.496	https://www.genecards.org/cgi-bin/carddisp.pl?gene=IRF2BP2
TGFB2	Transforming Growth Factor Beta 2	Protein Coding	P61812	58	GC01P218345	34.4846	https://www.genecards.org/cgi-bin/carddisp.pl?gene=TGFB2
POU5F1	POU Class 5 Homeobox 1	Protein Coding	Q01860	53	GC06M080873	34.4531	https://www.genecards.org/cgi-bin/carddisp.pl?gene=POU5F1
UBE2T	Ubiquitin Conjugating Enzyme E2 T	Protein Coding	Q9NPD8	50	GC01M202332	34.4134	https://www.genecards.org/cgi-bin/carddisp.pl?gene=UBE2T
FN1	Fibronectin 1	Protein Coding	P02751	57	GC02M215360	34.4029	https://www.genecards.org/cgi-bin/carddisp.pl?gene=FN1
EGR1	Early Growth Response 1	Protein Coding	P18146	51	GC05P138465	34.3903	https://www.genecards.org/cgi-bin/carddisp.pl?gene=EGR1
CD59	CD59 Molecule (CD59 Blood Group)	Protein Coding	P13987	53	GC11M033704	34.3834	https://www.genecards.org/cgi-bin/carddisp.pl?gene=CD59
INSR	Insulin Receptor	Protein Coding	P06213	61	GC19M007112	34.3244	https://www.genecards.org/cgi-bin/carddisp.pl?gene=INSR
MTCP1	Mature T Cell Proliferation 1	Protein Coding	P56278	38	GC0XM155065	34.2758	https://www.genecards.org/cgi-bin/carddisp.pl?gene=MTCP1
PRDM1	PR/SET Domain 1	Protein Coding	O75626	52	GC06P107226	34.2648	https://www.genecards.org/cgi-bin/carddisp.pl?gene=PRDM1
VDR	Vitamin D Receptor	Protein Coding	P11473	57	GC12M047841	34.1961	https://www.genecards.org/cgi-bin/carddisp.pl?gene=VDR
UNC13D	Unc-13 Homolog D	Protein Coding	Q70J99	51	GC17M075827	34.1862	https://www.genecards.org/cgi-bin/carddisp.pl?gene=UNC13D
ALB	Albumin	Protein Coding	P02768	56	GC04P073397	34.0672	https://www.genecards.org/cgi-bin/carddisp.pl?gene=ALB
HNF1B	HNF1 Homeobox B	Protein Coding	P35680	50	GC17M037686	33.9903	https://www.genecards.org/cgi-bin/carddisp.pl?gene=HNF1B
EPO	Erythropoietin	Protein Coding	P01588	49	GC07P100720	33.9628	https://www.genecards.org/cgi-bin/carddisp.pl?gene=EPO
RXRA	Retinoid X Receptor Alpha	Protein Coding	P19793	56	GC09P134317	33.9429	https://www.genecards.org/cgi-bin/carddisp.pl?gene=RXRA
MAL	Mal, T Cell Differentiation Protein	Protein Coding	P21145	43	GC02P095025	33.8945	https://www.genecards.org/cgi-bin/carddisp.pl?gene=MAL
CTPS1	CTP Synthase 1	Protein Coding	P17812	53	GC01P040979	33.7977	https://www.genecards.org/cgi-bin/carddisp.pl?gene=CTPS1
BLM	BLM RecQ Like Helicase	Protein Coding	P54132	56	GC15P090717	33.7591	https://www.genecards.org/cgi-bin/carddisp.pl?gene=BLM
SPN	Sialophorin	Protein Coding	P16150	46	GC16P029662	33.7339	https://www.genecards.org/cgi-bin/carddisp.pl?gene=SPN
IRF5	Interferon Regulatory Factor 5	Protein Coding	Q13568	53	GC07P128937	33.7265	https://www.genecards.org/cgi-bin/carddisp.pl?gene=IRF5
CALR	Calreticulin	Protein Coding	P27797	58	GC19P012938	33.6491	https://www.genecards.org/cgi-bin/carddisp.pl?gene=CALR
MEN1	Menin 1	Protein Coding	O00255	51	GC11M064803	33.6452	https://www.genecards.org/cgi-bin/carddisp.pl?gene=MEN1
CCR2	C-C Motif Chemokine Receptor 2	Protein Coding	P41597	51	GC03P051152	33.6156	https://www.genecards.org/cgi-bin/carddisp.pl?gene=CCR2
IDH2	Isocitrate Dehydrogenase (NADP(+)) 2	Protein Coding	P48735	59	GC15M090083	33.6025	https://www.genecards.org/cgi-bin/carddisp.pl?gene=IDH2
PAX1	Paired Box 1	Protein Coding	P15863	49	GC20P021705	33.6017	https://www.genecards.org/cgi-bin/carddisp.pl?gene=PAX1
EPCAM	Epithelial Cell Adhesion Molecule	Protein Coding	P16422	55	GC02P047345	33.5868	https://www.genecards.org/cgi-bin/carddisp.pl?gene=EPCAM
FLCN	Folliculin	Protein Coding	Q8NFG4	49	GC17M017212	33.5819	https://www.genecards.org/cgi-bin/carddisp.pl?gene=FLCN
DDX3X	DEAD-Box Helicase 3 X-Linked	Protein Coding	O00571	55	GC0XP041333	33.5781	https://www.genecards.org/cgi-bin/carddisp.pl?gene=DDX3X
CD47	CD47 Molecule	Protein Coding	Q08722	51	GC03M108043	33.5673	https://www.genecards.org/cgi-bin/carddisp.pl?gene=CD47
TNFSF13B	TNF Superfamily Member 13b	Protein Coding	Q9Y275	52	GC13P108251	33.5562	https://www.genecards.org/cgi-bin/carddisp.pl?gene=TNFSF13B
CD36	CD36 Molecule	Protein Coding	P16671	56	GC07P080369	33.5453	https://www.genecards.org/cgi-bin/carddisp.pl?gene=CD36
APP	Amyloid Beta Precursor Protein	Protein Coding	P05067	58	GC21M025880	33.5383	https://www.genecards.org/cgi-bin/carddisp.pl?gene=APP
TRAF6	TNF Receptor Associated Factor 6	Protein Coding	Q9Y4K3	53	GC11M036467	33.5094	https://www.genecards.org/cgi-bin/carddisp.pl?gene=TRAF6
CEBPB	CCAAT Enhancer Binding Protein Beta	Protein Coding	P17676	50	GC20P050190	33.4837	https://www.genecards.org/cgi-bin/carddisp.pl?gene=CEBPB
BCL2L11	BCL2 Like 11	Protein Coding	O43521	52	GC02P111119	33.4475	https://www.genecards.org/cgi-bin/carddisp.pl?gene=BCL2L11
PRKN	Parkin RBR E3 Ubiquitin Protein Ligase	Protein Coding	O60260	56	GC06M161348	33.4346	https://www.genecards.org/cgi-bin/carddisp.pl?gene=PRKN
PMS2	PMS1 Homolog 2, Mismatch Repair System Component	Protein Coding	P54278	56	GC07M005973	33.37	https://www.genecards.org/cgi-bin/carddisp.pl?gene=PMS2
XPO1	Exportin 1	Protein Coding	O14980	54	GC02M061445	33.3434	https://www.genecards.org/cgi-bin/carddisp.pl?gene=XPO1
DNMT3B	DNA Methyltransferase 3 Beta	Protein Coding	Q9UBC3	57	GC20P032762	33.3232	https://www.genecards.org/cgi-bin/carddisp.pl?gene=DNMT3B
TFEB	Transcription Factor EB	Protein Coding	P19484	49	GC06M081126	33.3099	https://www.genecards.org/cgi-bin/carddisp.pl?gene=TFEB
KLRC1	Killer Cell Lectin Like Receptor C1	Protein Coding	P26715	48	GC12M024910	33.2933	https://www.genecards.org/cgi-bin/carddisp.pl?gene=KLRC1
SFPQ	Splicing Factor Proline And Glutamine Rich	Protein Coding	P23246	50	GC01M035176	33.2883	https://www.genecards.org/cgi-bin/carddisp.pl?gene=SFPQ
GSK3B	Glycogen Synthase Kinase 3 Beta	Protein Coding	P49841	57	GC03M119821	33.2516	https://www.genecards.org/cgi-bin/carddisp.pl?gene=GSK3B
TYR	Tyrosinase	Protein Coding	P14679	55	GC11P089177	33.231	https://www.genecards.org/cgi-bin/carddisp.pl?gene=TYR
SIRT1	Sirtuin 1	Protein Coding	Q96EB6	56	GC10P067884	33.2173	https://www.genecards.org/cgi-bin/carddisp.pl?gene=SIRT1
CCL17	C-C Motif Chemokine Ligand 17	Protein Coding	Q92583	46	GC16P057439	33.2003	https://www.genecards.org/cgi-bin/carddisp.pl?gene=CCL17
CD1D	CD1d Molecule	Protein Coding	P15813	50	GC01P158178	33.1797	https://www.genecards.org/cgi-bin/carddisp.pl?gene=CD1D
TIAM1	TIAM Rac1 Associated GEF 1	Protein Coding	Q13009	52	GC21M031118	33.173	https://www.genecards.org/cgi-bin/carddisp.pl?gene=TIAM1
RHEB	Ras Homolog, MTORC1 Binding	Protein Coding	Q15382	57	GC07M151466	33.1048	https://www.genecards.org/cgi-bin/carddisp.pl?gene=RHEB
SOD1	Superoxide Dismutase 1	Protein Coding	P00441	60	GC21P031659	33.1038	https://www.genecards.org/cgi-bin/carddisp.pl?gene=SOD1
PRKACA	Protein Kinase CAMP-Activated Catalytic Subunit Alpha	Protein Coding	P17612	59	GC19M015540	33.0899	https://www.genecards.org/cgi-bin/carddisp.pl?gene=PRKACA
TGFBR1	Transforming Growth Factor Beta Receptor 1	Protein Coding	P36897	61	GC09P099104	33.0701	https://www.genecards.org/cgi-bin/carddisp.pl?gene=TGFBR1
NFATC2IP	Nuclear Factor Of Activated T Cells 2 Interacting Protein	Protein Coding	Q8NCF5	42	GC16P046962	33.0664	https://www.genecards.org/cgi-bin/carddisp.pl?gene=NFATC2IP
MAPK10	Mitogen-Activated Protein Kinase 10	Protein Coding	P53779	56	GC04M085990	33.0463	https://www.genecards.org/cgi-bin/carddisp.pl?gene=MAPK10
AIRE	Autoimmune Regulator	Protein Coding	O43918	50	GC21P044285	33.0195	https://www.genecards.org/cgi-bin/carddisp.pl?gene=AIRE
MUC4	Mucin 4, Cell Surface Associated	Protein Coding	Q99102	47	GC03M195746	33.0175	https://www.genecards.org/cgi-bin/carddisp.pl?gene=MUC4
SOX2	SRY-Box Transcription Factor 2	Protein Coding	P48431	52	GC03P181711	32.9593	https://www.genecards.org/cgi-bin/carddisp.pl?gene=SOX2
CDK9	Cyclin Dependent Kinase 9	Protein Coding	P50750	53	GC09P130037	32.9512	https://www.genecards.org/cgi-bin/carddisp.pl?gene=CDK9
PLAT	Plasminogen Activator, Tissue Type	Protein Coding	P00750	56	GC08M042174	32.937	https://www.genecards.org/cgi-bin/carddisp.pl?gene=PLAT
POLE	DNA Polymerase Epsilon, Catalytic Subunit	Protein Coding	Q07864	56	GC12M132740	32.9251	https://www.genecards.org/cgi-bin/carddisp.pl?gene=POLE
IL23A	Interleukin 23 Subunit Alpha	Protein Coding	Q9NPF7	45	GC12P058135	32.9202	https://www.genecards.org/cgi-bin/carddisp.pl?gene=IL23A
PRKCB	Protein Kinase C Beta	Protein Coding	P05771	55	GC16P046737	32.8878	https://www.genecards.org/cgi-bin/carddisp.pl?gene=PRKCB
BAP1	BRCA1 Associated Protein 1	Protein Coding	Q92560	54	GC03M052401	32.8862	https://www.genecards.org/cgi-bin/carddisp.pl?gene=BAP1
FHIT	Fragile Histidine Triad Diadenosine Triphosphatase	Protein Coding	P49789	50	GC03M059747	32.829	https://www.genecards.org/cgi-bin/carddisp.pl?gene=FHIT
MLLT10	MLLT10 Histone Lysine Methyltransferase DOT1L Cofactor	Protein Coding	P55197	49	GC10P021524	32.8044	https://www.genecards.org/cgi-bin/carddisp.pl?gene=MLLT10
CCNA2	Cyclin A2	Protein Coding	P20248	52	GC04M121816	32.7627	https://www.genecards.org/cgi-bin/carddisp.pl?gene=CCNA2
ITGB3	Integrin Subunit Beta 3	Protein Coding	P05106	59	GC17P078453	32.7431	https://www.genecards.org/cgi-bin/carddisp.pl?gene=ITGB3
E2F1	E2F Transcription Factor 1	Protein Coding	Q01094	50	GC20M033675	32.7254	https://www.genecards.org/cgi-bin/carddisp.pl?gene=E2F1
CD1A	CD1a Molecule	Protein Coding	P06126	46	GC01P158255	32.7095	https://www.genecards.org/cgi-bin/carddisp.pl?gene=CD1A
ALCAM	Activated Leukocyte Cell Adhesion Molecule	Protein Coding	Q13740	49	GC03P105366	32.6986	https://www.genecards.org/cgi-bin/carddisp.pl?gene=ALCAM
LMNA	Lamin A/C	Protein Coding	P02545	57	GC01P156082	32.6895	https://www.genecards.org/cgi-bin/carddisp.pl?gene=LMNA
CADM1	Cell Adhesion Molecule 1	Protein Coding	Q9BY67	51	GC11M115169	32.6507	https://www.genecards.org/cgi-bin/carddisp.pl?gene=CADM1
CDC27	Cell Division Cycle 27	Protein Coding	P30260	49	GC17M047117	32.6407	https://www.genecards.org/cgi-bin/carddisp.pl?gene=CDC27
MMP1	Matrix Metallopeptidase 1	Protein Coding	P03956	57	GC11M109978	32.6326	https://www.genecards.org/cgi-bin/carddisp.pl?gene=MMP1
CD38	CD38 Molecule	Protein Coding	P28907	53	GC04P021471	32.5838	https://www.genecards.org/cgi-bin/carddisp.pl?gene=CD38
HNF4A	Hepatocyte Nuclear Factor 4 Alpha	Protein Coding	P41235	56	GC20P044355	32.5732	https://www.genecards.org/cgi-bin/carddisp.pl?gene=HNF4A
BMP2	Bone Morphogenetic Protein 2	Protein Coding	P12643	53	GC20P006767	32.5431	https://www.genecards.org/cgi-bin/carddisp.pl?gene=BMP2
TLR3	Toll Like Receptor 3	Protein Coding	O15455	58	GC04P186059	32.5279	https://www.genecards.org/cgi-bin/carddisp.pl?gene=TLR3
ZEB1	Zinc Finger E-Box Binding Homeobox 1	Protein Coding	P37275	56	GC10P031318	32.5252	https://www.genecards.org/cgi-bin/carddisp.pl?gene=ZEB1
STIL	STIL Centriolar Assembly Protein	Protein Coding	Q15468	47	GC01M047250	32.4274	https://www.genecards.org/cgi-bin/carddisp.pl?gene=STIL
LIG1	DNA Ligase 1	Protein Coding	P18858	54	GC19M048115	32.4137	https://www.genecards.org/cgi-bin/carddisp.pl?gene=LIG1
MYCN	MYCN Proto-Oncogene, BHLH Transcription Factor	Protein Coding	P04198	54	GC02P015951	32.3828	https://www.genecards.org/cgi-bin/carddisp.pl?gene=MYCN
HGF	Hepatocyte Growth Factor	Protein Coding	P14210	58	GC07M081699	32.3304	https://www.genecards.org/cgi-bin/carddisp.pl?gene=HGF
SCN5A	Sodium Voltage-Gated Channel Alpha Subunit 5	Protein Coding	Q14524	57	GC03M038560	32.3071	https://www.genecards.org/cgi-bin/carddisp.pl?gene=SCN5A
ACTB	Actin Beta	Protein Coding	P60709	56	GC07M005527	32.2808	https://www.genecards.org/cgi-bin/carddisp.pl?gene=ACTB
VEGFC	Vascular Endothelial Growth Factor C	Protein Coding	P49767	54	GC04M176683	32.2126	https://www.genecards.org/cgi-bin/carddisp.pl?gene=VEGFC
MAP2K2	Mitogen-Activated Protein Kinase Kinase 2	Protein Coding	P36507	61	GC19M004090	32.1909	https://www.genecards.org/cgi-bin/carddisp.pl?gene=MAP2K2
COL1A1	Collagen Type I Alpha 1 Chain	Protein Coding	P02452	56	GC17M061318	32.1438	https://www.genecards.org/cgi-bin/carddisp.pl?gene=COL1A1
FOXO3	Forkhead Box O3	Protein Coding	O43524	54	GC06P108559	32.134	https://www.genecards.org/cgi-bin/carddisp.pl?gene=FOXO3
MPO	Myeloperoxidase	Protein Coding	P05164	60	GC17M058269	32.1304	https://www.genecards.org/cgi-bin/carddisp.pl?gene=MPO
SKP2	S-Phase Kinase Associated Protein 2	Protein Coding	Q13309	51	GC05P036151	32.0992	https://www.genecards.org/cgi-bin/carddisp.pl?gene=SKP2
LTA	Lymphotoxin Alpha	Protein Coding	P01374	49	GC06P104096	32.0788	https://www.genecards.org/cgi-bin/carddisp.pl?gene=LTA
LAG3	Lymphocyte Activating 3	Protein Coding	P18627	47	GC12P028197	32.0268	https://www.genecards.org/cgi-bin/carddisp.pl?gene=LAG3
CACNA1C	Calcium Voltage-Gated Channel Subunit Alpha1 C	Protein Coding	Q13936	56	GC12P001970	32.0235	https://www.genecards.org/cgi-bin/carddisp.pl?gene=CACNA1C
PBRM1	Polybromo 1	Protein Coding	Q86U86	52	GC03M052545	32.0135	https://www.genecards.org/cgi-bin/carddisp.pl?gene=PBRM1
EWSR1	EWS RNA Binding Protein 1	Protein Coding	Q01844	52	GC22P052150	31.9972	https://www.genecards.org/cgi-bin/carddisp.pl?gene=EWSR1
MAPT	Microtubule Associated Protein Tau	Protein Coding	P10636	57	GC17P045894	31.9688	https://www.genecards.org/cgi-bin/carddisp.pl?gene=MAPT
MPL	MPL Proto-Oncogene, Thrombopoietin Receptor	Protein Coding	P40238	54	GC01P043337	31.9599	https://www.genecards.org/cgi-bin/carddisp.pl?gene=MPL
PPP2R1B	Protein Phosphatase 2 Scaffold Subunit Abeta	Protein Coding	P30154	53	GC11M111716	31.9383	https://www.genecards.org/cgi-bin/carddisp.pl?gene=PPP2R1B
SOCS3	Suppressor Of Cytokine Signaling 3	Protein Coding	O14543	50	GC17M078356	31.9357	https://www.genecards.org/cgi-bin/carddisp.pl?gene=SOCS3
CD79B	CD79b Molecule	Protein Coding	P40259	53	GC17M063928	31.9297	https://www.genecards.org/cgi-bin/carddisp.pl?gene=CD79B
TBX3	T-Box Transcription Factor 3	Protein Coding	O15119	50	GC12M114670	31.9163	https://www.genecards.org/cgi-bin/carddisp.pl?gene=TBX3
SELP	Selectin P	Protein Coding	P16109	52	GC01M169558	31.8633	https://www.genecards.org/cgi-bin/carddisp.pl?gene=SELP
CD14	CD14 Molecule	Protein Coding	P08571	53	GC05M140631	31.8319	https://www.genecards.org/cgi-bin/carddisp.pl?gene=CD14
CCR1	C-C Motif Chemokine Receptor 1	Protein Coding	P32246	50	GC03M046218	31.8293	https://www.genecards.org/cgi-bin/carddisp.pl?gene=CCR1
LIF	LIF Interleukin 6 Family Cytokine	Protein Coding	P15018	50	GC22M030240	31.8195	https://www.genecards.org/cgi-bin/carddisp.pl?gene=LIF
ANPEP	Alanyl Aminopeptidase, Membrane	Protein Coding	P15144	56	GC15M089784	31.7984	https://www.genecards.org/cgi-bin/carddisp.pl?gene=ANPEP
XPC	XPC Complex Subunit, DNA Damage Recognition And Repair Factor	Protein Coding	Q01831	53	GC03M023368	31.796	https://www.genecards.org/cgi-bin/carddisp.pl?gene=XPC
CAT	Catalase	Protein Coding	P04040	58	GC11P034460	31.7397	https://www.genecards.org/cgi-bin/carddisp.pl?gene=CAT
PROM1	Prominin 1	Protein Coding	O43490	53	GC04M015965	31.7322	https://www.genecards.org/cgi-bin/carddisp.pl?gene=PROM1
CP	Ceruloplasmin	Protein Coding	P00450	55	GC03M149162	31.6788	https://www.genecards.org/cgi-bin/carddisp.pl?gene=CP
AK2	Adenylate Kinase 2	Protein Coding	P54819	54	GC01M033007	31.6293	https://www.genecards.org/cgi-bin/carddisp.pl?gene=AK2
IRF2	Interferon Regulatory Factor 2	Protein Coding	P14316	49	GC04M184387	31.6193	https://www.genecards.org/cgi-bin/carddisp.pl?gene=IRF2
KCNN4	Potassium Calcium-Activated Channel Subfamily N Member 4	Protein Coding	O15554	54	GC19M079674	31.6054	https://www.genecards.org/cgi-bin/carddisp.pl?gene=KCNN4
PIK3R3	Phosphoinositide-3-Kinase Regulatory Subunit 3	Protein Coding	Q92569	52	GC01M046041	31.5885	https://www.genecards.org/cgi-bin/carddisp.pl?gene=PIK3R3
SREBF2	Sterol Regulatory Element Binding Transcription Factor 2	Protein Coding	Q12772	50	GC22P041833	31.5732	https://www.genecards.org/cgi-bin/carddisp.pl?gene=SREBF2
MME	Membrane Metalloendopeptidase	Protein Coding	P08473	57	GC03P155024	31.57	https://www.genecards.org/cgi-bin/carddisp.pl?gene=MME
IL1RN	Interleukin 1 Receptor Antagonist	Protein Coding	P18510	57	GC02P125995	31.528	https://www.genecards.org/cgi-bin/carddisp.pl?gene=IL1RN
CR1	Complement C3b/C4b Receptor 1 (Knops Blood Group)	Protein Coding	P17927	51	GC01P207496	31.5094	https://www.genecards.org/cgi-bin/carddisp.pl?gene=CR1
IL18R1	Interleukin 18 Receptor 1	Protein Coding	Q13478	50	GC02P102311	31.4688	https://www.genecards.org/cgi-bin/carddisp.pl?gene=IL18R1
SERPINE1	Serpin Family E Member 1	Protein Coding	P05121	57	GC07P101127	31.4406	https://www.genecards.org/cgi-bin/carddisp.pl?gene=SERPINE1
TP73	Tumor Protein P73	Protein Coding	O15350	52	GC01P003652	31.3865	https://www.genecards.org/cgi-bin/carddisp.pl?gene=TP73
RORC	RAR Related Orphan Receptor C	Protein Coding	P51449	50	GC01M151806	31.3651	https://www.genecards.org/cgi-bin/carddisp.pl?gene=RORC
CALM1	Calmodulin 1	Protein Coding	P0DP23	53	GC14P090396	31.3555	https://www.genecards.org/cgi-bin/carddisp.pl?gene=CALM1
AXL	AXL Receptor Tyrosine Kinase	Protein Coding	P30530	58	GC19P041219	31.2981	https://www.genecards.org/cgi-bin/carddisp.pl?gene=AXL
CHD7	Chromodomain Helicase DNA Binding Protein 7	Protein Coding	Q9P2D1	53	GC08P060678	31.2779	https://www.genecards.org/cgi-bin/carddisp.pl?gene=CHD7
MSH3	MutS Homolog 3	Protein Coding	P20585	50	GC05P080654	31.2661	https://www.genecards.org/cgi-bin/carddisp.pl?gene=MSH3
CD58	CD58 Molecule	Protein Coding	P19256	47	GC01M116514	31.2273	https://www.genecards.org/cgi-bin/carddisp.pl?gene=CD58
ERCC2	ERCC Excision Repair 2, TFIIH Core Complex Helicase Subunit	Protein Coding	P18074	54	GC19M045349	31.2168	https://www.genecards.org/cgi-bin/carddisp.pl?gene=ERCC2
EZR	Ezrin	Protein Coding	P15311	53	GC06M158765	31.2045	https://www.genecards.org/cgi-bin/carddisp.pl?gene=EZR
RPA1	Replication Protein A1	Protein Coding	P27694	54	GC17P001829	31.0942	https://www.genecards.org/cgi-bin/carddisp.pl?gene=RPA1
KCNQ1	Potassium Voltage-Gated Channel Subfamily Q Member 1	Protein Coding	P51787	57	GC11P002444	31.0822	https://www.genecards.org/cgi-bin/carddisp.pl?gene=KCNQ1
IL12A	Interleukin 12A	Protein Coding	P29459	50	GC03P159988	31.0658	https://www.genecards.org/cgi-bin/carddisp.pl?gene=IL12A
LGALS1	Galectin 1	Protein Coding	P09382	49	GC22P037675	31.059	https://www.genecards.org/cgi-bin/carddisp.pl?gene=LGALS1
THBS1	Thrombospondin 1	Protein Coding	P07996	52	GC15P039581	31.0337	https://www.genecards.org/cgi-bin/carddisp.pl?gene=THBS1
CDH2	Cadherin 2	Protein Coding	P19022	58	GC18M030290	31.0279	https://www.genecards.org/cgi-bin/carddisp.pl?gene=CDH2
SASH3	SAM And SH3 Domain Containing 3	Protein Coding	O75995	42	GC0XP129781	31.0094	https://www.genecards.org/cgi-bin/carddisp.pl?gene=SASH3
CBFB	Core-Binding Factor Subunit Beta	Protein Coding	Q13951	53	GC16P067034	30.9912	https://www.genecards.org/cgi-bin/carddisp.pl?gene=CBFB
NUMA1	Nuclear Mitotic Apparatus Protein 1	Protein Coding	Q14980	50	GC11M072002	30.9883	https://www.genecards.org/cgi-bin/carddisp.pl?gene=NUMA1
MYOC	Myocilin	Protein Coding	Q99972	49	GC01M171604	30.931	https://www.genecards.org/cgi-bin/carddisp.pl?gene=MYOC
CXCR5	C-X-C Motif Chemokine Receptor 5	Protein Coding	P32302	48	GC11P118928	30.8975	https://www.genecards.org/cgi-bin/carddisp.pl?gene=CXCR5
ERCC6	ERCC Excision Repair 6, Chromatin Remodeling Factor	Protein Coding	Q03468	53	GC10M049454	30.8869	https://www.genecards.org/cgi-bin/carddisp.pl?gene=ERCC6
ABCC1	ATP Binding Cassette Subfamily C Member 1	Protein Coding	P33527	55	GC16P015949	30.8854	https://www.genecards.org/cgi-bin/carddisp.pl?gene=ABCC1
IKBKE	Inhibitor Of Nuclear Factor Kappa B Kinase Subunit Epsilon	Protein Coding	Q14164	51	GC01P206470	30.869	https://www.genecards.org/cgi-bin/carddisp.pl?gene=IKBKE
MAP3K8	Mitogen-Activated Protein Kinase Kinase Kinase 8	Protein Coding	P41279	53	GC10P030575	30.867	https://www.genecards.org/cgi-bin/carddisp.pl?gene=MAP3K8
DEF6	DEF6 Guanine Nucleotide Exchange Factor	Protein Coding	Q9H4E7	48	GC06P104216	30.8513	https://www.genecards.org/cgi-bin/carddisp.pl?gene=DEF6
CD8B	CD8 Subunit Beta	Protein Coding	P10966	48	GC02M086815	30.8168	https://www.genecards.org/cgi-bin/carddisp.pl?gene=CD8B
PRKAR2B	Protein Kinase CAMP-Dependent Type II Regulatory Subunit Beta	Protein Coding	P31323	50	GC07P107044	30.7823	https://www.genecards.org/cgi-bin/carddisp.pl?gene=PRKAR2B
STAT6	Signal Transducer And Activator Of Transcription 6	Protein Coding	P42226	57	GC12M057095	30.7502	https://www.genecards.org/cgi-bin/carddisp.pl?gene=STAT6
HDAC4	Histone Deacetylase 4	Protein Coding	P56524	59	GC02M239048	30.7214	https://www.genecards.org/cgi-bin/carddisp.pl?gene=HDAC4
NT5E	5'-Nucleotidase Ecto	Protein Coding	P21589	59	GC06P085449	30.6806	https://www.genecards.org/cgi-bin/carddisp.pl?gene=NT5E
LGALS3	Galectin 3	Protein Coding	P17931	52	GC14P055124	30.6627	https://www.genecards.org/cgi-bin/carddisp.pl?gene=LGALS3
PDGFB	Platelet Derived Growth Factor Subunit B	Protein Coding	P01127	58	GC22M069031	30.6488	https://www.genecards.org/cgi-bin/carddisp.pl?gene=PDGFB
SART1	Spliceosome Associated Factor 1, Recruiter Of U4/U6.U5 Tri-SnRNP	Protein Coding	O43290	46	GC11P072943	30.6264	https://www.genecards.org/cgi-bin/carddisp.pl?gene=SART1
TAGAP	T Cell Activation RhoGTPase Activating Protein	Protein Coding	Q8N103	45	GC06M159034	30.6148	https://www.genecards.org/cgi-bin/carddisp.pl?gene=TAGAP
ROCK1	Rho Associated Coiled-Coil Containing Protein Kinase 1	Protein Coding	Q13464	56	GC18M020946	30.6114	https://www.genecards.org/cgi-bin/carddisp.pl?gene=ROCK1
TTC7A	Tetratricopeptide Repeat Domain 7A	Protein Coding	Q9ULT0	45	GC02P046906	30.5933	https://www.genecards.org/cgi-bin/carddisp.pl?gene=TTC7A
XRCC5	X-Ray Repair Cross Complementing 5	Protein Coding	P13010	51	GC02P216107	30.5297	https://www.genecards.org/cgi-bin/carddisp.pl?gene=XRCC5
PICALM	Phosphatidylinositol Binding Clathrin Assembly Protein	Protein Coding	Q13492	51	GC11M085957	30.5182	https://www.genecards.org/cgi-bin/carddisp.pl?gene=PICALM
PDCD1LG2	Programmed Cell Death 1 Ligand 2	Protein Coding	Q9BQ51	49	GC09P005510	30.4662	https://www.genecards.org/cgi-bin/carddisp.pl?gene=PDCD1LG2
TBX6	T-Box Transcription Factor 6	Protein Coding	O95947	47	GC16M030085	30.4271	https://www.genecards.org/cgi-bin/carddisp.pl?gene=TBX6
CSK	C-Terminal Src Kinase	Protein Coding	P41240	54	GC15P074782	30.3672	https://www.genecards.org/cgi-bin/carddisp.pl?gene=CSK
HLA-E	Major Histocompatibility Complex, Class I, E	Protein Coding	P13747	48	GC06P104071	30.3615	https://www.genecards.org/cgi-bin/carddisp.pl?gene=HLA-E
GJA1	Gap Junction Protein Alpha 1	Protein Coding	P17302	57	GC06P121436	30.361	https://www.genecards.org/cgi-bin/carddisp.pl?gene=GJA1
TFE3	Transcription Factor Binding To IGHM Enhancer 3	Protein Coding	P19532	51	GC0XM049028	30.3338	https://www.genecards.org/cgi-bin/carddisp.pl?gene=TFE3
HAVCR1	Hepatitis A Virus Cellular Receptor 1	Protein Coding	Q96D42	49	GC05M157028	30.3105	https://www.genecards.org/cgi-bin/carddisp.pl?gene=HAVCR1
TG	Thyroglobulin	Protein Coding	P01266	51	GC08P132866	30.2893	https://www.genecards.org/cgi-bin/carddisp.pl?gene=TG
BCOR	BCL6 Corepressor	Protein Coding	Q6W2J9	50	GC0XM040049	30.275	https://www.genecards.org/cgi-bin/carddisp.pl?gene=BCOR
ITPR1	Inositol 1,4,5-Trisphosphate Receptor Type 1	Protein Coding	Q14643	55	GC03P004486	30.2143	https://www.genecards.org/cgi-bin/carddisp.pl?gene=ITPR1
KEAP1	Kelch Like ECH Associated Protein 1	Protein Coding	Q14145	56	GC19M010486	30.1957	https://www.genecards.org/cgi-bin/carddisp.pl?gene=KEAP1
IGF2	Insulin Like Growth Factor 2	Protein Coding	P01344	56	GC11M008042	30.1853	https://www.genecards.org/cgi-bin/carddisp.pl?gene=IGF2
RYR1	Ryanodine Receptor 1	Protein Coding	P21817	54	GC19P083224	30.154	https://www.genecards.org/cgi-bin/carddisp.pl?gene=RYR1
CSF1R	Colony Stimulating Factor 1 Receptor	Protein Coding	P07333	59	GC05M150053	30.1183	https://www.genecards.org/cgi-bin/carddisp.pl?gene=CSF1R
EPHA2	EPH Receptor A2	Protein Coding	P29317	60	GC01M016124	30.0599	https://www.genecards.org/cgi-bin/carddisp.pl?gene=EPHA2
KRT5	Keratin 5	Protein Coding	P13647	53	GC12M052514	30.0594	https://www.genecards.org/cgi-bin/carddisp.pl?gene=KRT5
SLAMF6	SLAM Family Member 6	Protein Coding	Q96DU3	46	GC01M160454	30.0446	https://www.genecards.org/cgi-bin/carddisp.pl?gene=SLAMF6
NRP1	Neuropilin 1	Protein Coding	O14786	54	GC10M033177	30.0097	https://www.genecards.org/cgi-bin/carddisp.pl?gene=NRP1
ELOC	Elongin C	Protein Coding	Q15369	48	GC08M073939	29.9594	https://www.genecards.org/cgi-bin/carddisp.pl?gene=ELOC
FOXP1	Forkhead Box P1	Protein Coding	Q9H334	51	GC03M070954	29.9234	https://www.genecards.org/cgi-bin/carddisp.pl?gene=FOXP1
KRT14	Keratin 14	Protein Coding	P02533	53	GC17M041582	29.921	https://www.genecards.org/cgi-bin/carddisp.pl?gene=KRT14
SIRPG	Signal Regulatory Protein Gamma	Protein Coding	Q9P1W8	46	GC20M001628	29.9188	https://www.genecards.org/cgi-bin/carddisp.pl?gene=SIRPG
CD6	CD6 Molecule	Protein Coding	P30203	49	GC11P060971	29.9036	https://www.genecards.org/cgi-bin/carddisp.pl?gene=CD6
KIR3DL1	Killer Cell Immunoglobulin Like Receptor, Three Ig Domains And Long Cytoplasmic Tail 1	Protein Coding	P43629	45	GC19P083917	29.8679	https://www.genecards.org/cgi-bin/carddisp.pl?gene=KIR3DL1
PLAU	Plasminogen Activator, Urokinase	Protein Coding	P00749	58	GC10P073909	29.8612	https://www.genecards.org/cgi-bin/carddisp.pl?gene=PLAU
RUNX3	RUNX Family Transcription Factor 3	Protein Coding	Q13761	50	GC01M024899	29.8148	https://www.genecards.org/cgi-bin/carddisp.pl?gene=RUNX3
ERBB3	Erb-B2 Receptor Tyrosine Kinase 3	Protein Coding	P21860	61	GC12P058086	29.8085	https://www.genecards.org/cgi-bin/carddisp.pl?gene=ERBB3
CD226	CD226 Molecule	Protein Coding	Q15762	48	GC18M069831	29.7942	https://www.genecards.org/cgi-bin/carddisp.pl?gene=CD226
CX3CR1	C-X3-C Motif Chemokine Receptor 1	Protein Coding	P49238	49	GC03M039279	29.7736	https://www.genecards.org/cgi-bin/carddisp.pl?gene=CX3CR1
FANCD2	FA Complementation Group D2	Protein Coding	Q9BXW9	53	GC03P010026	29.7534	https://www.genecards.org/cgi-bin/carddisp.pl?gene=FANCD2
PRKAR1B	Protein Kinase CAMP-Dependent Type I Regulatory Subunit Beta	Protein Coding	P31321	53	GC07M000549	29.7334	https://www.genecards.org/cgi-bin/carddisp.pl?gene=PRKAR1B
CTNNBL1	Catenin Beta Like 1	Protein Coding	Q8WYA6	47	GC20P037693	29.6871	https://www.genecards.org/cgi-bin/carddisp.pl?gene=CTNNBL1
ASXL1	ASXL Transcriptional Regulator 1	Protein Coding	Q8IXJ9	50	GC20P033478	29.6551	https://www.genecards.org/cgi-bin/carddisp.pl?gene=ASXL1
TIMD4	T Cell Immunoglobulin And Mucin Domain Containing 4	Protein Coding	Q96H15	46	GC05M156919	29.6211	https://www.genecards.org/cgi-bin/carddisp.pl?gene=TIMD4
HDAC2	Histone Deacetylase 2	Protein Coding	Q92769	59	GC06M113933	29.595	https://www.genecards.org/cgi-bin/carddisp.pl?gene=HDAC2
RFX1	Regulatory Factor X1	Protein Coding	P22670	45	GC19M013961	29.5625	https://www.genecards.org/cgi-bin/carddisp.pl?gene=RFX1
MAPK9	Mitogen-Activated Protein Kinase 9	Protein Coding	P45984	55	GC05M180273	29.5613	https://www.genecards.org/cgi-bin/carddisp.pl?gene=MAPK9
HMOX1	Heme Oxygenase 1	Protein Coding	P09601	59	GC22P035380	29.5595	https://www.genecards.org/cgi-bin/carddisp.pl?gene=HMOX1
BLNK	B Cell Linker	Protein Coding	Q8WV28	53	GC10M096274	29.5588	https://www.genecards.org/cgi-bin/carddisp.pl?gene=BLNK
IRF7	Interferon Regulatory Factor 7	Protein Coding	Q92985	54	GC11M000612	29.5536	https://www.genecards.org/cgi-bin/carddisp.pl?gene=IRF7
RAD51	RAD51 Recombinase	Protein Coding	Q06609	57	GC15P040694	29.5472	https://www.genecards.org/cgi-bin/carddisp.pl?gene=RAD51
STAR	Steroidogenic Acute Regulatory Protein	Protein Coding	P49675	51	GC08M038153	29.547	https://www.genecards.org/cgi-bin/carddisp.pl?gene=STAR
TRGC1	T Cell Receptor Gamma Constant 1	Protein Coding	A2JGV3	21	GC07M038257	29.5418	https://www.genecards.org/cgi-bin/carddisp.pl?gene=TRGC1
GLI2	GLI Family Zinc Finger 2	Protein Coding	P10070	56	GC02P120735	29.5241	https://www.genecards.org/cgi-bin/carddisp.pl?gene=GLI2
GNAQ	G Protein Subunit Alpha Q	Protein Coding	P50148	56	GC09M077716	29.5045	https://www.genecards.org/cgi-bin/carddisp.pl?gene=GNAQ
CHEK1	Checkpoint Kinase 1	Protein Coding	O14757	57	GC11P125625	29.4952	https://www.genecards.org/cgi-bin/carddisp.pl?gene=CHEK1
IRS1	Insulin Receptor Substrate 1	Protein Coding	P35568	54	GC02M226731	29.4892	https://www.genecards.org/cgi-bin/carddisp.pl?gene=IRS1
FGF10	Fibroblast Growth Factor 10	Protein Coding	O15520	53	GC05M044500	29.4887	https://www.genecards.org/cgi-bin/carddisp.pl?gene=FGF10
XBP1	X-Box Binding Protein 1	Protein Coding	P17861	52	GC22M028794	29.4726	https://www.genecards.org/cgi-bin/carddisp.pl?gene=XBP1
PAX6	Paired Box 6	Protein Coding	P26367	54	GC11M031784	29.4659	https://www.genecards.org/cgi-bin/carddisp.pl?gene=PAX6
PLK1	Polo Like Kinase 1	Protein Coding	P53350	58	GC16P046733	29.4639	https://www.genecards.org/cgi-bin/carddisp.pl?gene=PLK1
KLRB1	Killer Cell Lectin Like Receptor B1	Protein Coding	Q12918	46	GC12M024896	29.3616	https://www.genecards.org/cgi-bin/carddisp.pl?gene=KLRB1
ARAF	A-Raf Proto-Oncogene, Serine/Threonine Kinase	Protein Coding	P10398	53	GC0XP047921	29.3587	https://www.genecards.org/cgi-bin/carddisp.pl?gene=ARAF
EPOR	Erythropoietin Receptor	Protein Coding	P19235	55	GC19M011377	29.3455	https://www.genecards.org/cgi-bin/carddisp.pl?gene=EPOR
AP3B1	Adaptor Related Protein Complex 3 Subunit Beta 1	Protein Coding	O00203	52	GC05M078000	29.3414	https://www.genecards.org/cgi-bin/carddisp.pl?gene=AP3B1
XRCC4	X-Ray Repair Cross Complementing 4	Protein Coding	Q13426	50	GC05P083077	29.3185	https://www.genecards.org/cgi-bin/carddisp.pl?gene=XRCC4
SET	SET Nuclear Proto-Oncogene	Protein Coding	Q01105	52	GC09P130099	29.3139	https://www.genecards.org/cgi-bin/carddisp.pl?gene=SET
GDNF	Glial Cell Derived Neurotrophic Factor	Protein Coding	P39905	56	GC05M037812	29.3085	https://www.genecards.org/cgi-bin/carddisp.pl?gene=GDNF
CCNB1	Cyclin B1	Protein Coding	P14635	53	GC05P069167	29.303	https://www.genecards.org/cgi-bin/carddisp.pl?gene=CCNB1
BCL11A	BCL11 Transcription Factor A	Protein Coding	Q9H165	50	GC02M060451	29.2933	https://www.genecards.org/cgi-bin/carddisp.pl?gene=BCL11A
PDPK1	3-Phosphoinositide Dependent Protein Kinase 1	Protein Coding	O15530	55	GC16P002537	29.2825	https://www.genecards.org/cgi-bin/carddisp.pl?gene=PDPK1
NKX2-1	NK2 Homeobox 1	Protein Coding	P43699	54	GC14M036516	29.2807	https://www.genecards.org/cgi-bin/carddisp.pl?gene=NKX2-1
CD33	CD33 Molecule	Protein Coding	P20138	52	GC19P083739	29.2782	https://www.genecards.org/cgi-bin/carddisp.pl?gene=CD33
YY1	YY1 Transcription Factor	Protein Coding	P25490	55	GC14P100238	29.2748	https://www.genecards.org/cgi-bin/carddisp.pl?gene=YY1
CACNA1G	Calcium Voltage-Gated Channel Subunit Alpha1 G	Protein Coding	O43497	56	GC17P078647	29.2492	https://www.genecards.org/cgi-bin/carddisp.pl?gene=CACNA1G
RAB27A	RAB27A, Member RAS Oncogene Family	Protein Coding	P51159	54	GC15M055202	29.1602	https://www.genecards.org/cgi-bin/carddisp.pl?gene=RAB27A
SGK1	Serum/Glucocorticoid Regulated Kinase 1	Protein Coding	O00141	56	GC06M134169	29.1245	https://www.genecards.org/cgi-bin/carddisp.pl?gene=SGK1
NGF	Nerve Growth Factor	Protein Coding	P01138	58	GC01M115285	29.1111	https://www.genecards.org/cgi-bin/carddisp.pl?gene=NGF
MRE11	MRE11 Homolog, Double Strand Break Repair Nuclease	Protein Coding	P49959	54	GC11M109894	29.111	https://www.genecards.org/cgi-bin/carddisp.pl?gene=MRE11
LBR	Lamin B Receptor	Protein Coding	Q14739	53	GC01M225401	29.1091	https://www.genecards.org/cgi-bin/carddisp.pl?gene=LBR
FLT1	Fms Related Receptor Tyrosine Kinase 1	Protein Coding	P17948	58	GC13M028300	29.1055	https://www.genecards.org/cgi-bin/carddisp.pl?gene=FLT1
CXCL13	C-X-C Motif Chemokine Ligand 13	Protein Coding	O43927	47	GC04P077511	29.0933	https://www.genecards.org/cgi-bin/carddisp.pl?gene=CXCL13
PRKD1	Protein Kinase D1	Protein Coding	Q15139	56	GC14M029576	29.0918	https://www.genecards.org/cgi-bin/carddisp.pl?gene=PRKD1
GZMA	Granzyme A	Protein Coding	P12544	49	GC05P055102	29.0843	https://www.genecards.org/cgi-bin/carddisp.pl?gene=GZMA
OGG1	8-Oxoguanine DNA Glycosylase	Protein Coding	O15527	54	GC03P014579	29.0789	https://www.genecards.org/cgi-bin/carddisp.pl?gene=OGG1
MRTFA	Myocardin Related Transcription Factor A	Protein Coding	Q969V6	48	GC22M069024	29.0623	https://www.genecards.org/cgi-bin/carddisp.pl?gene=MRTFA
SMAD2	SMAD Family Member 2	Protein Coding	Q15796	59	GC18M047809	29.0267	https://www.genecards.org/cgi-bin/carddisp.pl?gene=SMAD2
RASA1	RAS P21 Protein Activator 1	Protein Coding	P20936	53	GC05P087267	29.0257	https://www.genecards.org/cgi-bin/carddisp.pl?gene=RASA1
CCR3	C-C Motif Chemokine Receptor 3	Protein Coding	P51677	52	GC03P051148	29.0215	https://www.genecards.org/cgi-bin/carddisp.pl?gene=CCR3
BTLA	B And T Lymphocyte Associated	Protein Coding	Q7Z6A9	46	GC03M112463	28.9805	https://www.genecards.org/cgi-bin/carddisp.pl?gene=BTLA
LGALS9	Galectin 9	Protein Coding	O00182	46	GC17P027629	28.9762	https://www.genecards.org/cgi-bin/carddisp.pl?gene=LGALS9
PLAUR	Plasminogen Activator, Urokinase Receptor	Protein Coding	Q03405	52	GC19M043646	28.9424	https://www.genecards.org/cgi-bin/carddisp.pl?gene=PLAUR
NTRK1	Neurotrophic Receptor Tyrosine Kinase 1	Protein Coding	P04629	56	GC01P156815	28.9288	https://www.genecards.org/cgi-bin/carddisp.pl?gene=NTRK1
CLU	Clusterin	Protein Coding	P10909	54	GC08M027596	28.8936	https://www.genecards.org/cgi-bin/carddisp.pl?gene=CLU
FUS	FUS RNA Binding Protein	Protein Coding	P35637	51	GC16P031180	28.8432	https://www.genecards.org/cgi-bin/carddisp.pl?gene=FUS
ZEB2	Zinc Finger E-Box Binding Homeobox 2	Protein Coding	O60315	54	GC02M144384	28.8056	https://www.genecards.org/cgi-bin/carddisp.pl?gene=ZEB2
RPTOR	Regulatory Associated Protein Of MTOR Complex 1	Protein Coding	Q8N122	49	GC17P080544	28.7904	https://www.genecards.org/cgi-bin/carddisp.pl?gene=RPTOR
CDKN2C	Cyclin Dependent Kinase Inhibitor 2C	Protein Coding	P42773	51	GC01P050960	28.7879	https://www.genecards.org/cgi-bin/carddisp.pl?gene=CDKN2C
XRCC6	X-Ray Repair Cross Complementing 6	Protein Coding	P12956	52	GC22P052578	28.7873	https://www.genecards.org/cgi-bin/carddisp.pl?gene=XRCC6
ADIPOQ	Adiponectin, C1Q And Collagen Domain Containing	Protein Coding	Q15848	52	GC03P186842	28.7871	https://www.genecards.org/cgi-bin/carddisp.pl?gene=ADIPOQ
EDN1	Endothelin 1	Protein Coding	P05305	56	GC06P012236	28.7867	https://www.genecards.org/cgi-bin/carddisp.pl?gene=EDN1
AURKB	Aurora Kinase B	Protein Coding	Q96GD4	58	GC17M013554	28.7582	https://www.genecards.org/cgi-bin/carddisp.pl?gene=AURKB
RPS6KB1	Ribosomal Protein S6 Kinase B1	Protein Coding	P23443	56	GC17P059893	28.7068	https://www.genecards.org/cgi-bin/carddisp.pl?gene=RPS6KB1
CDK12	Cyclin Dependent Kinase 12	Protein Coding	Q9NYV4	53	GC17P039461	28.7008	https://www.genecards.org/cgi-bin/carddisp.pl?gene=CDK12
FAT1	FAT Atypical Cadherin 1	Protein Coding	Q14517	46	GC04M186587	28.6998	https://www.genecards.org/cgi-bin/carddisp.pl?gene=FAT1
DSP	Desmoplakin	Protein Coding	P15924	57	GC06P007541	28.6821	https://www.genecards.org/cgi-bin/carddisp.pl?gene=DSP
THPO	Thrombopoietin	Protein Coding	P40225	50	GC03M184371	28.6654	https://www.genecards.org/cgi-bin/carddisp.pl?gene=THPO
VWF	Von Willebrand Factor	Protein Coding	P04275	54	GC12M006031	28.6496	https://www.genecards.org/cgi-bin/carddisp.pl?gene=VWF
FCGR2B	Fc Gamma Receptor IIb	Protein Coding	P31994	55	GC01P161976	28.6375	https://www.genecards.org/cgi-bin/carddisp.pl?gene=FCGR2B
TBX20	T-Box Transcription Factor 20	Protein Coding	Q9UMR3	48	GC07M035237	28.6371	https://www.genecards.org/cgi-bin/carddisp.pl?gene=TBX20
PSEN1	Presenilin 1	Protein Coding	P49768	59	GC14P073136	28.6264	https://www.genecards.org/cgi-bin/carddisp.pl?gene=PSEN1
SH2B3	SH2B Adaptor Protein 3	Protein Coding	Q9UQQ2	54	GC12P111405	28.6262	https://www.genecards.org/cgi-bin/carddisp.pl?gene=SH2B3
AKT3	AKT Serine/Threonine Kinase 3	Protein Coding	Q9Y243	61	GC01M243488	28.6244	https://www.genecards.org/cgi-bin/carddisp.pl?gene=AKT3
XRCC1	X-Ray Repair Cross Complementing 1	Protein Coding	P18887	51	GC19M043543	28.6027	https://www.genecards.org/cgi-bin/carddisp.pl?gene=XRCC1
PTPN2	Protein Tyrosine Phosphatase Non-Receptor Type 2	Protein Coding	P17706	53	GC18M030182	28.5955	https://www.genecards.org/cgi-bin/carddisp.pl?gene=PTPN2
TXN	Thioredoxin	Protein Coding	P10599	52	GC09M110243	28.5841	https://www.genecards.org/cgi-bin/carddisp.pl?gene=TXN
TNFRSF10A	TNF Receptor Superfamily Member 10a	Protein Coding	O00220	52	GC08M023190	28.5681	https://www.genecards.org/cgi-bin/carddisp.pl?gene=TNFRSF10A
GATA4	GATA Binding Protein 4	Protein Coding	P43694	56	GC08P011676	28.5371	https://www.genecards.org/cgi-bin/carddisp.pl?gene=GATA4
TRAF2	TNF Receptor Associated Factor 2	Protein Coding	Q12933	52	GC09P136881	28.5268	https://www.genecards.org/cgi-bin/carddisp.pl?gene=TRAF2
HES1	Hes Family BHLH Transcription Factor 1	Protein Coding	Q14469	51	GC03P194136	28.5252	https://www.genecards.org/cgi-bin/carddisp.pl?gene=HES1
AHR	Aryl Hydrocarbon Receptor	Protein Coding	P35869	53	GC07P016916	28.4235	https://www.genecards.org/cgi-bin/carddisp.pl?gene=AHR
PTPRJ	Protein Tyrosine Phosphatase Receptor Type J	Protein Coding	Q12913	55	GC11P048002	28.4192	https://www.genecards.org/cgi-bin/carddisp.pl?gene=PTPRJ
P2RX7	Purinergic Receptor P2X 7	Protein Coding	Q99572	53	GC12P128227	28.4192	https://www.genecards.org/cgi-bin/carddisp.pl?gene=P2RX7
MYH9	Myosin Heavy Chain 9	Protein Coding	P35579	54	GC22M036281	28.3246	https://www.genecards.org/cgi-bin/carddisp.pl?gene=MYH9
IL16	Interleukin 16	Protein Coding	Q14005	47	GC15P081159	28.2916	https://www.genecards.org/cgi-bin/carddisp.pl?gene=IL16
SMO	Smoothened, Frizzled Class Receptor	Protein Coding	Q99835	58	GC07P133426	28.2914	https://www.genecards.org/cgi-bin/carddisp.pl?gene=SMO
TBX19	T-Box Transcription Factor 19	Protein Coding	O60806	46	GC01P168280	28.2551	https://www.genecards.org/cgi-bin/carddisp.pl?gene=TBX19
JUND	JunD Proto-Oncogene, AP-1 Transcription Factor Subunit	Protein Coding	P17535	48	GC19M018279	28.2459	https://www.genecards.org/cgi-bin/carddisp.pl?gene=JUND
NUP98	Nucleoporin 98 And 96 Precursor	Protein Coding	P52948	52	GC11M003671	28.2327	https://www.genecards.org/cgi-bin/carddisp.pl?gene=NUP98
KCNE1	Potassium Voltage-Gated Channel Subfamily E Regulatory Subunit 1	Protein Coding	P15382	53	GC21M034446	28.1749	https://www.genecards.org/cgi-bin/carddisp.pl?gene=KCNE1
ABCG2	ATP Binding Cassette Subfamily G Member 2 (Junior Blood Group)	Protein Coding	Q9UNQ0	56	GC04M088090	28.1578	https://www.genecards.org/cgi-bin/carddisp.pl?gene=ABCG2
CYLD	CYLD Lysine 63 Deubiquitinase	Protein Coding	Q9NQC7	54	GC16P050742	28.1438	https://www.genecards.org/cgi-bin/carddisp.pl?gene=CYLD
GJB2	Gap Junction Protein Beta 2	Protein Coding	P29033	52	GC13M020187	28.1285	https://www.genecards.org/cgi-bin/carddisp.pl?gene=GJB2
CTNNA1	Catenin Alpha 1	Protein Coding	P35221	53	GC05P138616	28.0748	https://www.genecards.org/cgi-bin/carddisp.pl?gene=CTNNA1
GFAP	Glial Fibrillary Acidic Protein	Protein Coding	P14136	55	GC17M061018	28.0744	https://www.genecards.org/cgi-bin/carddisp.pl?gene=GFAP
LDLR	Low Density Lipoprotein Receptor	Protein Coding	P01130	58	GC19P011212	28.0482	https://www.genecards.org/cgi-bin/carddisp.pl?gene=LDLR
TBK1	TANK Binding Kinase 1	Protein Coding	Q9UHD2	56	GC12P064451	28.0095	https://www.genecards.org/cgi-bin/carddisp.pl?gene=TBK1
ATR	ATR Serine/Threonine Kinase	Protein Coding	Q13535	60	GC03M142449	27.9571	https://www.genecards.org/cgi-bin/carddisp.pl?gene=ATR
KCNH2	Potassium Voltage-Gated Channel Subfamily H Member 2	Protein Coding	Q12809	57	GC07M150944	27.8783	https://www.genecards.org/cgi-bin/carddisp.pl?gene=KCNH2
TLR7	Toll Like Receptor 7	Protein Coding	Q9NYK1	54	GC0XP012867	27.878	https://www.genecards.org/cgi-bin/carddisp.pl?gene=TLR7
MECP2	Methyl-CpG Binding Protein 2	Protein Coding	P51608	53	GC0XM154021	27.8488	https://www.genecards.org/cgi-bin/carddisp.pl?gene=MECP2
LMO1	LIM Domain Only 1	Protein Coding	P25800	48	GC11M008224	27.8138	https://www.genecards.org/cgi-bin/carddisp.pl?gene=LMO1
IL1R1	Interleukin 1 Receptor Type 1	Protein Coding	P14778	53	GC02P102136	27.807	https://www.genecards.org/cgi-bin/carddisp.pl?gene=IL1R1
JUNB	JunB Proto-Oncogene, AP-1 Transcription Factor Subunit	Protein Coding	P17275	48	GC19P012791	27.7969	https://www.genecards.org/cgi-bin/carddisp.pl?gene=JUNB
SRSF2	Serine And Arginine Rich Splicing Factor 2	Protein Coding	Q01130	48	GC17M076734	27.7608	https://www.genecards.org/cgi-bin/carddisp.pl?gene=SRSF2
TREM2	Triggering Receptor Expressed On Myeloid Cells 2	Protein Coding	Q9NZC2	51	GC06M081112	27.7358	https://www.genecards.org/cgi-bin/carddisp.pl?gene=TREM2
CD1B	CD1b Molecule	Protein Coding	P29016	45	GC01M158297	27.727	https://www.genecards.org/cgi-bin/carddisp.pl?gene=CD1B
KDM4C	Lysine Demethylase 4C	Protein Coding	Q9H3R0	49	GC09P006720	27.7148	https://www.genecards.org/cgi-bin/carddisp.pl?gene=KDM4C
BCL3	BCL3 Transcription Coactivator	Protein Coding	P20749	48	GC19P044747	27.697	https://www.genecards.org/cgi-bin/carddisp.pl?gene=BCL3
MICA	MHC Class I Polypeptide-Related Sequence A	Protein Coding	Q29983	45	GC06P031399	27.6964	https://www.genecards.org/cgi-bin/carddisp.pl?gene=MICA
CD1C	CD1c Molecule	Protein Coding	P29017	45	GC01P158289	27.686	https://www.genecards.org/cgi-bin/carddisp.pl?gene=CD1C
FANCC	FA Complementation Group C	Protein Coding	Q00597	55	GC09M095099	27.6805	https://www.genecards.org/cgi-bin/carddisp.pl?gene=FANCC
TNFSF9	TNF Superfamily Member 9	Protein Coding	P41273	44	GC19P006531	27.6707	https://www.genecards.org/cgi-bin/carddisp.pl?gene=TNFSF9
JUP	Junction Plakoglobin	Protein Coding	P14923	56	GC17M041754	27.6401	https://www.genecards.org/cgi-bin/carddisp.pl?gene=JUP
BMP4	Bone Morphogenetic Protein 4	Protein Coding	P12644	56	GC14M053949	27.6283	https://www.genecards.org/cgi-bin/carddisp.pl?gene=BMP4
ELANE	Elastase, Neutrophil Expressed	Protein Coding	P08246	58	GC19P005575	27.6193	https://www.genecards.org/cgi-bin/carddisp.pl?gene=ELANE
MUC16	Mucin 16, Cell Surface Associated	Protein Coding	Q8WXI7	44	GC19M008848	27.5964	https://www.genecards.org/cgi-bin/carddisp.pl?gene=MUC16
TGFA	Transforming Growth Factor Alpha	Protein Coding	P01135	53	GC02M070447	27.5909	https://www.genecards.org/cgi-bin/carddisp.pl?gene=TGFA
TEC	Tec Protein Tyrosine Kinase	Protein Coding	P42680	52	GC04M048213	27.5619	https://www.genecards.org/cgi-bin/carddisp.pl?gene=TEC
IVNS1ABP	Influenza Virus NS1A Binding Protein	Protein Coding	Q9Y6Y0	49	GC01M185307	27.5303	https://www.genecards.org/cgi-bin/carddisp.pl?gene=IVNS1ABP
KNSTRN	Kinetochore Localized Astrin (SPAG5) Binding Protein	Protein Coding	Q9Y448	45	GC15P040382	27.5202	https://www.genecards.org/cgi-bin/carddisp.pl?gene=KNSTRN
KAT5	Lysine Acetyltransferase 5	Protein Coding	Q92993	57	GC11P065711	27.4915	https://www.genecards.org/cgi-bin/carddisp.pl?gene=KAT5
TYMS	Thymidylate Synthetase	Protein Coding	P04818	57	GC18P000657	27.4797	https://www.genecards.org/cgi-bin/carddisp.pl?gene=TYMS
YWHAE	Tyrosine 3-Monooxygenase/Tryptophan 5-Monooxygenase Activation Protein Epsilon	Protein Coding	P62258	56	GC17M013155	27.4081	https://www.genecards.org/cgi-bin/carddisp.pl?gene=YWHAE
ACE	Angiotensin I Converting Enzyme	Protein Coding	P12821	58	GC17P063477	27.3808	https://www.genecards.org/cgi-bin/carddisp.pl?gene=ACE
PTHLH	Parathyroid Hormone Like Hormone	Protein Coding	P12272	53	GC12M027959	27.3776	https://www.genecards.org/cgi-bin/carddisp.pl?gene=PTHLH
ITGA5	Integrin Subunit Alpha 5	Protein Coding	P08648	55	GC12M055257	27.3589	https://www.genecards.org/cgi-bin/carddisp.pl?gene=ITGA5
AKAP9	A-Kinase Anchoring Protein 9	Protein Coding	Q99996	49	GC07P091940	27.3541	https://www.genecards.org/cgi-bin/carddisp.pl?gene=AKAP9
IRAK4	Interleukin 1 Receptor Associated Kinase 4	Protein Coding	Q9NWZ3	56	GC12P043758	27.3528	https://www.genecards.org/cgi-bin/carddisp.pl?gene=IRAK4
FANCA	FA Complementation Group A	Protein Coding	O15360	57	GC16M089950	27.343	https://www.genecards.org/cgi-bin/carddisp.pl?gene=FANCA
STX11	Syntaxin 11	Protein Coding	O75558	48	GC06P144215	27.3108	https://www.genecards.org/cgi-bin/carddisp.pl?gene=STX11
ITGA6	Integrin Subunit Alpha 6	Protein Coding	P23229	57	GC02P172427	27.2971	https://www.genecards.org/cgi-bin/carddisp.pl?gene=ITGA6
MMP14	Matrix Metallopeptidase 14	Protein Coding	P50281	58	GC14P038444	27.2834	https://www.genecards.org/cgi-bin/carddisp.pl?gene=MMP14
BSG	Basigin (Ok Blood Group)	Protein Coding	P35613	51	GC19P000571	27.2831	https://www.genecards.org/cgi-bin/carddisp.pl?gene=BSG
NOTCH3	Notch Receptor 3	Protein Coding	Q9UM47	58	GC19M015159	27.2689	https://www.genecards.org/cgi-bin/carddisp.pl?gene=NOTCH3
HLA-DPA1	Major Histocompatibility Complex, Class II, DP Alpha 1	Protein Coding	P20036	48	GC06M033064	27.2671	https://www.genecards.org/cgi-bin/carddisp.pl?gene=HLA-DPA1
ADAM10	ADAM Metallopeptidase Domain 10	Protein Coding	O14672	60	GC15M058588	27.2079	https://www.genecards.org/cgi-bin/carddisp.pl?gene=ADAM10
PGR	Progesterone Receptor	Protein Coding	P06401	56	GC11M109955	27.1959	https://www.genecards.org/cgi-bin/carddisp.pl?gene=PGR
ELAVL1	ELAV Like RNA Binding Protein 1	Protein Coding	Q15717	48	GC19M007958	27.1832	https://www.genecards.org/cgi-bin/carddisp.pl?gene=ELAVL1
HNRNPH1	Heterogeneous Nuclear Ribonucleoprotein H1	Protein Coding	P31943	48	GC05M179614	27.1829	https://www.genecards.org/cgi-bin/carddisp.pl?gene=HNRNPH1
PPP2R2A	Protein Phosphatase 2 Regulatory Subunit Balpha	Protein Coding	P63151	52	GC08P026292	27.1793	https://www.genecards.org/cgi-bin/carddisp.pl?gene=PPP2R2A
MAP3K7	Mitogen-Activated Protein Kinase Kinase Kinase 7	Protein Coding	O43318	58	GC06M090513	27.1708	https://www.genecards.org/cgi-bin/carddisp.pl?gene=MAP3K7
TRBC2	T Cell Receptor Beta Constant 2	Protein Coding	A0A5B9	25	GC07P152175	27.1628	https://www.genecards.org/cgi-bin/carddisp.pl?gene=TRBC2
MTHFD1	Methylenetetrahydrofolate Dehydrogenase, Cyclohydrolase And Formyltetrahydrofolate Synthetase 1	Protein Coding	P11586	52	GC14P064388	27.1612	https://www.genecards.org/cgi-bin/carddisp.pl?gene=MTHFD1
CD83	CD83 Molecule	Protein Coding	Q01151	47	GC06P014117	27.1508	https://www.genecards.org/cgi-bin/carddisp.pl?gene=CD83
CARD9	Caspase Recruitment Domain Family Member 9	Protein Coding	Q9H257	52	GC09M136364	27.1186	https://www.genecards.org/cgi-bin/carddisp.pl?gene=CARD9
NOD2	Nucleotide Binding Oligomerization Domain Containing 2	Protein Coding	Q9HC29	54	GC16P050693	27.1124	https://www.genecards.org/cgi-bin/carddisp.pl?gene=NOD2
FLNA	Filamin A	Protein Coding	P21333	55	GC0XM154348	27.0916	https://www.genecards.org/cgi-bin/carddisp.pl?gene=FLNA
TRBC1	T Cell Receptor Beta Constant 1	Protein Coding	P01850	29	GC07P152173	27.0784	https://www.genecards.org/cgi-bin/carddisp.pl?gene=TRBC1
PRKAR2A	Protein Kinase CAMP-Dependent Type II Regulatory Subunit Alpha	Protein Coding	P13861	52	GC03M048744	27.0743	https://www.genecards.org/cgi-bin/carddisp.pl?gene=PRKAR2A
S100B	S100 Calcium Binding Protein B	Protein Coding	P04271	51	GC21M052331	26.9504	https://www.genecards.org/cgi-bin/carddisp.pl?gene=S100B
HPS3	HPS3 Biogenesis Of Lysosomal Organelles Complex 2 Subunit 1	Protein Coding	Q969F9	46	GC03P149129	26.9458	https://www.genecards.org/cgi-bin/carddisp.pl?gene=HPS3
ACP5	Acid Phosphatase 5, Tartrate Resistant	Protein Coding	P13686	53	GC19M011574	26.9374	https://www.genecards.org/cgi-bin/carddisp.pl?gene=ACP5
CDC25C	Cell Division Cycle 25C	Protein Coding	P30307	54	GC05M138285	26.9353	https://www.genecards.org/cgi-bin/carddisp.pl?gene=CDC25C
RAD50	RAD50 Double Strand Break Repair Protein	Protein Coding	Q92878	56	GC05P132556	26.9231	https://www.genecards.org/cgi-bin/carddisp.pl?gene=RAD50
TLR8	Toll Like Receptor 8	Protein Coding	Q9NR97	55	GC0XP012924	26.9197	https://www.genecards.org/cgi-bin/carddisp.pl?gene=TLR8
GAPDH	Glyceraldehyde-3-Phosphate Dehydrogenase	Protein Coding	P04406	57	GC12P028185	26.8925	https://www.genecards.org/cgi-bin/carddisp.pl?gene=GAPDH
CBLB	Cbl Proto-Oncogene B	Protein Coding	Q13191	52	GC03M105655	26.8469	https://www.genecards.org/cgi-bin/carddisp.pl?gene=CBLB
LYST	Lysosomal Trafficking Regulator	Protein Coding	Q99698	45	GC01M235661	26.8403	https://www.genecards.org/cgi-bin/carddisp.pl?gene=LYST
TNFRSF17	TNF Receptor Superfamily Member 17	Protein Coding	Q02223	53	GC16P011965	26.798	https://www.genecards.org/cgi-bin/carddisp.pl?gene=TNFRSF17
HCK	HCK Proto-Oncogene, Src Family Tyrosine Kinase	Protein Coding	P08631	54	GC20P032052	26.7849	https://www.genecards.org/cgi-bin/carddisp.pl?gene=HCK
COL2A1	Collagen Type II Alpha 1 Chain	Protein Coding	P02458	57	GC12M047972	26.7661	https://www.genecards.org/cgi-bin/carddisp.pl?gene=COL2A1
RECQL4	RecQ Like Helicase 4	Protein Coding	O94761	48	GC08M146085	26.7336	https://www.genecards.org/cgi-bin/carddisp.pl?gene=RECQL4
PPP2R5C	Protein Phosphatase 2 Regulatory Subunit B'Gamma	Protein Coding	Q13362	50	GC14P112830	26.7004	https://www.genecards.org/cgi-bin/carddisp.pl?gene=PPP2R5C
MAP3K14	Mitogen-Activated Protein Kinase Kinase Kinase 14	Protein Coding	Q99558	52	GC17M045263	26.6659	https://www.genecards.org/cgi-bin/carddisp.pl?gene=MAP3K14
PRKCZ	Protein Kinase C Zeta	Protein Coding	Q05513	55	GC01P005301	26.653	https://www.genecards.org/cgi-bin/carddisp.pl?gene=PRKCZ
CDC25A	Cell Division Cycle 25A	Protein Coding	P30304	54	GC03M048245	26.6338	https://www.genecards.org/cgi-bin/carddisp.pl?gene=CDC25A
ENO2	Enolase 2	Protein Coding	P09104	54	GC12P006913	26.6223	https://www.genecards.org/cgi-bin/carddisp.pl?gene=ENO2
CDH5	Cadherin 5	Protein Coding	P33151	53	GC16P066366	26.6013	https://www.genecards.org/cgi-bin/carddisp.pl?gene=CDH5
BDNF	Brain Derived Neurotrophic Factor	Protein Coding	P23560	56	GC11M027654	26.5909	https://www.genecards.org/cgi-bin/carddisp.pl?gene=BDNF
CD9	CD9 Molecule	Protein Coding	P21926	50	GC12P028152	26.5791	https://www.genecards.org/cgi-bin/carddisp.pl?gene=CD9
FCGR2A	Fc Gamma Receptor IIa	Protein Coding	P12318	54	GC01P161505	26.573	https://www.genecards.org/cgi-bin/carddisp.pl?gene=FCGR2A
ITGAE	Integrin Subunit Alpha E	Protein Coding	P38570	47	GC17M013289	26.5535	https://www.genecards.org/cgi-bin/carddisp.pl?gene=ITGAE
PRL	Prolactin	Protein Coding	P01236	50	GC06M022287	26.552	https://www.genecards.org/cgi-bin/carddisp.pl?gene=PRL
IL22	Interleukin 22	Protein Coding	Q9GZX6	48	GC12M068248	26.5438	https://www.genecards.org/cgi-bin/carddisp.pl?gene=IL22
NF2	NF2, Moesin-Ezrin-Radixin Like (MERLIN) Tumor Suppressor	Protein Coding	P35240	56	GC22P029603	26.535	https://www.genecards.org/cgi-bin/carddisp.pl?gene=NF2
IRF6	Interferon Regulatory Factor 6	Protein Coding	O14896	49	GC01M209785	26.5335	https://www.genecards.org/cgi-bin/carddisp.pl?gene=IRF6
KRT19	Keratin 19	Protein Coding	P08727	50	GC17M041523	26.531	https://www.genecards.org/cgi-bin/carddisp.pl?gene=KRT19
TOM1	Target Of Myb1 Membrane Trafficking Protein	Protein Coding	O60784	49	GC22P035299	26.5183	https://www.genecards.org/cgi-bin/carddisp.pl?gene=TOM1
NME1	NME/NM23 Nucleoside Diphosphate Kinase 1	Protein Coding	P15531	52	GC17P078654	26.5118	https://www.genecards.org/cgi-bin/carddisp.pl?gene=NME1
ANXA1	Annexin A1	Protein Coding	P04083	53	GC09P073151	26.5098	https://www.genecards.org/cgi-bin/carddisp.pl?gene=ANXA1
PTPN1	Protein Tyrosine Phosphatase Non-Receptor Type 1	Protein Coding	P18031	57	GC20P050510	26.5064	https://www.genecards.org/cgi-bin/carddisp.pl?gene=PTPN1
TOP2A	DNA Topoisomerase II Alpha	Protein Coding	P11388	57	GC17M040388	26.5054	https://www.genecards.org/cgi-bin/carddisp.pl?gene=TOP2A
PPP2R2B	Protein Phosphatase 2 Regulatory Subunit Bbeta	Protein Coding	Q00005	52	GC05M146582	26.504	https://www.genecards.org/cgi-bin/carddisp.pl?gene=PPP2R2B
KRT18	Keratin 18	Protein Coding	P05783	57	GC12P052948	26.4949	https://www.genecards.org/cgi-bin/carddisp.pl?gene=KRT18
NQO1	NAD(P)H Quinone Dehydrogenase 1	Protein Coding	P15559	54	GC16M069706	26.4899	https://www.genecards.org/cgi-bin/carddisp.pl?gene=NQO1
ITPR3	Inositol 1,4,5-Trisphosphate Receptor Type 3	Protein Coding	Q14573	53	GC06P033620	26.4826	https://www.genecards.org/cgi-bin/carddisp.pl?gene=ITPR3
GBA1	Glucosylceramidase Beta 1	Protein Coding	P04062	56	GC01M156443	26.4666	https://www.genecards.org/cgi-bin/carddisp.pl?gene=GBA1
PDX1	Pancreatic And Duodenal Homeobox 1	Protein Coding	P52945	53	GC13P027921	26.459	https://www.genecards.org/cgi-bin/carddisp.pl?gene=PDX1
CYP1A1	Cytochrome P450 Family 1 Subfamily A Member 1	Protein Coding	P04798	54	GC15M074719	26.449	https://www.genecards.org/cgi-bin/carddisp.pl?gene=CYP1A1
FYB1	FYN Binding Protein 1	Protein Coding	O15117	49	GC05M039105	26.4106	https://www.genecards.org/cgi-bin/carddisp.pl?gene=FYB1
BUB1B	BUB1 Mitotic Checkpoint Serine/Threonine Kinase B	Protein Coding	O60566	57	GC15P040161	26.4015	https://www.genecards.org/cgi-bin/carddisp.pl?gene=BUB1B
BAD	BCL2 Associated Agonist Of Cell Death	Protein Coding	Q92934	50	GC11M109178	26.3967	https://www.genecards.org/cgi-bin/carddisp.pl?gene=BAD
TSLP	Thymic Stromal Lymphopoietin	Protein Coding	Q969D9	45	GC05P111070	26.3951	https://www.genecards.org/cgi-bin/carddisp.pl?gene=TSLP
BGLAP	Bone Gamma-Carboxyglutamate Protein	Protein Coding	P02818	46	GC01P156242	26.3912	https://www.genecards.org/cgi-bin/carddisp.pl?gene=BGLAP
SQSTM1	Sequestosome 1	Protein Coding	Q13501	56	GC05P179806	26.3638	https://www.genecards.org/cgi-bin/carddisp.pl?gene=SQSTM1
ITGA2	Integrin Subunit Alpha 2	Protein Coding	P17301	53	GC05P052989	26.3454	https://www.genecards.org/cgi-bin/carddisp.pl?gene=ITGA2
PTPA	Protein Phosphatase 2 Phosphatase Activator	Protein Coding	Q15257	49	GC09P130118	26.3167	https://www.genecards.org/cgi-bin/carddisp.pl?gene=PTPA
CDK5	Cyclin Dependent Kinase 5	Protein Coding	Q00535	60	GC07M151053	26.3089	https://www.genecards.org/cgi-bin/carddisp.pl?gene=CDK5
IFNA2	Interferon Alpha 2	Protein Coding	P01563	50	GC09M021384	26.3016	https://www.genecards.org/cgi-bin/carddisp.pl?gene=IFNA2
PSMC4	Proteasome 26S Subunit, ATPase 4	Protein Coding	P43686	48	GC19P083265	26.2908	https://www.genecards.org/cgi-bin/carddisp.pl?gene=PSMC4
CRP	C-Reactive Protein	Protein Coding	P02741	52	GC01M159732	26.2731	https://www.genecards.org/cgi-bin/carddisp.pl?gene=CRP
TTR	Transthyretin	Protein Coding	P02766	55	GC18P031557	26.2693	https://www.genecards.org/cgi-bin/carddisp.pl?gene=TTR
PRKCE	Protein Kinase C Epsilon	Protein Coding	Q02156	55	GC02P045651	26.259	https://www.genecards.org/cgi-bin/carddisp.pl?gene=PRKCE
TCP1	T-Complex 1	Protein Coding	P17987	49	GC06M159778	26.2501	https://www.genecards.org/cgi-bin/carddisp.pl?gene=TCP1
CASP1	Caspase 1	Protein Coding	P29466	56	GC11M105025	26.239	https://www.genecards.org/cgi-bin/carddisp.pl?gene=CASP1
SH3KBP1	SH3 Domain Containing Kinase Binding Protein 1	Protein Coding	Q96B97	49	GC0XM019552	26.2369	https://www.genecards.org/cgi-bin/carddisp.pl?gene=SH3KBP1
FCHO1	FCH And Mu Domain Containing Endocytic Adaptor 1	Protein Coding	O14526	44	GC19P082833	26.232	https://www.genecards.org/cgi-bin/carddisp.pl?gene=FCHO1
DDIT3	DNA Damage Inducible Transcript 3	Protein Coding	P35638	53	GC12M057516	26.223	https://www.genecards.org/cgi-bin/carddisp.pl?gene=DDIT3
TRBV11-2	T Cell Receptor Beta Variable 11-2	Protein Coding	A0A584	17	GC07P153246	26.191	https://www.genecards.org/cgi-bin/carddisp.pl?gene=TRBV11-2
NCOR2	Nuclear Receptor Corepressor 2	Protein Coding	Q9Y618	50	GC12M124324	26.1883	https://www.genecards.org/cgi-bin/carddisp.pl?gene=NCOR2
PIEZO1	Piezo Type Mechanosensitive Ion Channel Component 1	Protein Coding	Q92508	47	GC16M088715	26.1879	https://www.genecards.org/cgi-bin/carddisp.pl?gene=PIEZO1
ADAM17	ADAM Metallopeptidase Domain 17	Protein Coding	P78536	57	GC02M009488	26.1857	https://www.genecards.org/cgi-bin/carddisp.pl?gene=ADAM17
H2AC18	H2A Clustered Histone 18	Protein Coding	Q6FI13	36	GC01M155818	26.1829	https://www.genecards.org/cgi-bin/carddisp.pl?gene=H2AC18
PSMB8	Proteasome 20S Subunit Beta 8	Protein Coding	P28062	57	GC06M032840	26.1543	https://www.genecards.org/cgi-bin/carddisp.pl?gene=PSMB8
RPL5	Ribosomal Protein L5	Protein Coding	P46777	54	GC01P092832	26.146	https://www.genecards.org/cgi-bin/carddisp.pl?gene=RPL5
BRD4	Bromodomain Containing 4	Protein Coding	O60885	54	GC19M015585	26.144	https://www.genecards.org/cgi-bin/carddisp.pl?gene=BRD4
MIF	Macrophage Migration Inhibitory Factor	Protein Coding	P14174	54	GC22P023894	26.0971	https://www.genecards.org/cgi-bin/carddisp.pl?gene=MIF
ASPSCR1	ASPSCR1 Tether For SLC2A4, UBX Domain Containing	Protein Coding	Q9BZE9	48	GC17P081976	26.0962	https://www.genecards.org/cgi-bin/carddisp.pl?gene=ASPSCR1
BIRC2	Baculoviral IAP Repeat Containing 2	Protein Coding	Q13490	54	GC11P102347	26.067	https://www.genecards.org/cgi-bin/carddisp.pl?gene=BIRC2
ADA2	Adenosine Deaminase 2	Protein Coding	Q9NZK5	48	GC22M017262	26.0647	https://www.genecards.org/cgi-bin/carddisp.pl?gene=ADA2
ENTPD1	Ectonucleoside Triphosphate Diphosphohydrolase 1	Protein Coding	P49961	57	GC10P098649	26.0342	https://www.genecards.org/cgi-bin/carddisp.pl?gene=ENTPD1
XPA	XPA, DNA Damage Recognition And Repair Factor	Protein Coding	P23025	52	GC09M097654	26.0327	https://www.genecards.org/cgi-bin/carddisp.pl?gene=XPA
TLR9	Toll Like Receptor 9	Protein Coding	Q9NR96	52	GC03M052595	26.0257	https://www.genecards.org/cgi-bin/carddisp.pl?gene=TLR9
POMC	Proopiomelanocortin	Protein Coding	P01189	54	GC02M025160	25.9914	https://www.genecards.org/cgi-bin/carddisp.pl?gene=POMC
ERCC1	ERCC Excision Repair 1, Endonuclease Non-Catalytic Subunit	Protein Coding	P07992	53	GC19M079717	25.9854	https://www.genecards.org/cgi-bin/carddisp.pl?gene=ERCC1
HSPA5	Heat Shock Protein Family A (Hsp70) Member 5	Protein Coding	P11021	56	GC09M125234	25.9569	https://www.genecards.org/cgi-bin/carddisp.pl?gene=HSPA5
ESR2	Estrogen Receptor 2	Protein Coding	Q92731	56	GC14M064084	25.9546	https://www.genecards.org/cgi-bin/carddisp.pl?gene=ESR2
LIFR	LIF Receptor Subunit Alpha	Protein Coding	P42702	53	GC05M038475	25.9176	https://www.genecards.org/cgi-bin/carddisp.pl?gene=LIFR
ITGAV	Integrin Subunit Alpha V	Protein Coding	P06756	54	GC02P186589	25.9176	https://www.genecards.org/cgi-bin/carddisp.pl?gene=ITGAV
HSPG2	Heparan Sulfate Proteoglycan 2	Protein Coding	P98160	54	GC01M021822	25.9172	https://www.genecards.org/cgi-bin/carddisp.pl?gene=HSPG2
CD22	CD22 Molecule	Protein Coding	P20273	53	GC19P035319	25.8972	https://www.genecards.org/cgi-bin/carddisp.pl?gene=CD22
DKC1	Dyskerin Pseudouridine Synthase 1	Protein Coding	O60832	53	GC0XP154762	25.8912	https://www.genecards.org/cgi-bin/carddisp.pl?gene=DKC1
ANK2	Ankyrin 2	Protein Coding	Q01484	48	GC04P112719	25.8893	https://www.genecards.org/cgi-bin/carddisp.pl?gene=ANK2
TEK	TEK Receptor Tyrosine Kinase	Protein Coding	Q02763	58	GC09P027109	25.8861	https://www.genecards.org/cgi-bin/carddisp.pl?gene=TEK
MYH11	Myosin Heavy Chain 11	Protein Coding	P35749	53	GC16M016248	25.8743	https://www.genecards.org/cgi-bin/carddisp.pl?gene=MYH11
BAK1	BCL2 Antagonist/Killer 1	Protein Coding	Q16611	52	GC06M033572	25.867	https://www.genecards.org/cgi-bin/carddisp.pl?gene=BAK1
BMI1	BMI1 Proto-Oncogene, Polycomb Ring Finger	Protein Coding	P35226	49	GC10P022326	25.8598	https://www.genecards.org/cgi-bin/carddisp.pl?gene=BMI1
SST	Somatostatin	Protein Coding	P61278	47	GC03M187668	25.8494	https://www.genecards.org/cgi-bin/carddisp.pl?gene=SST
MCM4	Minichromosome Maintenance Complex Component 4	Protein Coding	P33991	54	GC08P047965	25.8484	https://www.genecards.org/cgi-bin/carddisp.pl?gene=MCM4
CFH	Complement Factor H	Protein Coding	P08603	54	GC01P196621	25.8335	https://www.genecards.org/cgi-bin/carddisp.pl?gene=CFH
IL11	Interleukin 11	Protein Coding	P20809	47	GC19M055364	25.8275	https://www.genecards.org/cgi-bin/carddisp.pl?gene=IL11
RAP1A	RAP1A, Member Of RAS Oncogene Family	Protein Coding	P62834	51	GC01P111542	25.8266	https://www.genecards.org/cgi-bin/carddisp.pl?gene=RAP1A
NCKAP1L	NCK Associated Protein 1 Like	Protein Coding	P55160	46	GC12P054497	25.8245	https://www.genecards.org/cgi-bin/carddisp.pl?gene=NCKAP1L
HFE	Homeostatic Iron Regulator	Protein Coding	Q30201	52	GC06P026087	25.8129	https://www.genecards.org/cgi-bin/carddisp.pl?gene=HFE
TJP1	Tight Junction Protein 1	Protein Coding	Q07157	51	GC15M029699	25.7923	https://www.genecards.org/cgi-bin/carddisp.pl?gene=TJP1
HSPA4	Heat Shock Protein Family A (Hsp70) Member 4	Protein Coding	P34932	49	GC05P133062	25.7833	https://www.genecards.org/cgi-bin/carddisp.pl?gene=HSPA4
SMPD1	Sphingomyelin Phosphodiesterase 1	Protein Coding	P17405	56	GC11P006390	25.7716	https://www.genecards.org/cgi-bin/carddisp.pl?gene=SMPD1
ERCC3	ERCC Excision Repair 3, TFIIH Core Complex Helicase Subunit	Protein Coding	P19447	54	GC02M127257	25.7667	https://www.genecards.org/cgi-bin/carddisp.pl?gene=ERCC3
SOD2	Superoxide Dismutase 2	Protein Coding	P04179	54	GC06M159669	25.7541	https://www.genecards.org/cgi-bin/carddisp.pl?gene=SOD2
TGFB3	Transforming Growth Factor Beta 3	Protein Coding	P10600	54	GC14M075958	25.7507	https://www.genecards.org/cgi-bin/carddisp.pl?gene=TGFB3
SMAD7	SMAD Family Member 7	Protein Coding	O15105	50	GC18M048919	25.7295	https://www.genecards.org/cgi-bin/carddisp.pl?gene=SMAD7
PAK1	P21 (RAC1) Activated Kinase 1	Protein Coding	Q13153	57	GC11M109658	25.7199	https://www.genecards.org/cgi-bin/carddisp.pl?gene=PAK1
ZNF341	Zinc Finger Protein 341	Protein Coding	Q9BYN7	42	GC20P033731	25.711	https://www.genecards.org/cgi-bin/carddisp.pl?gene=ZNF341
HPRT1	Hypoxanthine Phosphoribosyltransferase 1	Protein Coding	P00492	55	GC0XP134460	25.7089	https://www.genecards.org/cgi-bin/carddisp.pl?gene=HPRT1
MAF	MAF BZIP Transcription Factor	Protein Coding	O75444	52	GC16M079204	25.7085	https://www.genecards.org/cgi-bin/carddisp.pl?gene=MAF
ADAR	Adenosine Deaminase RNA Specific	Protein Coding	P55265	52	GC01M156147	25.6753	https://www.genecards.org/cgi-bin/carddisp.pl?gene=ADAR
IGHE	Immunoglobulin Heavy Constant Epsilon	Protein Coding	P01854	36	GC14M115495	25.6614	https://www.genecards.org/cgi-bin/carddisp.pl?gene=IGHE
CRKL	CRK Like Proto-Oncogene, Adaptor Protein	Protein Coding	P46109	53	GC22P020917	25.6439	https://www.genecards.org/cgi-bin/carddisp.pl?gene=CRKL
EPAS1	Endothelial PAS Domain Protein 1	Protein Coding	Q99814	57	GC02P046293	25.6341	https://www.genecards.org/cgi-bin/carddisp.pl?gene=EPAS1
SLC4A1	Solute Carrier Family 4 Member 1 (Diego Blood Group)	Protein Coding	P02730	55	GC17M060986	25.6338	https://www.genecards.org/cgi-bin/carddisp.pl?gene=SLC4A1
CCNT1	Cyclin T1	Protein Coding	O60563	48	GC12M048688	25.6337	https://www.genecards.org/cgi-bin/carddisp.pl?gene=CCNT1
NONO	Non-POU Domain Containing Octamer Binding	Protein Coding	Q15233	52	GC0XP071255	25.6115	https://www.genecards.org/cgi-bin/carddisp.pl?gene=NONO
GATA6	GATA Binding Protein 6	Protein Coding	Q92908	54	GC18P022169	25.61	https://www.genecards.org/cgi-bin/carddisp.pl?gene=GATA6
TCL1B	TCL1 Family AKT Coactivator B	Protein Coding	O95988	42	GC14P095686	25.5783	https://www.genecards.org/cgi-bin/carddisp.pl?gene=TCL1B
SNCA	Synuclein Alpha	Protein Coding	P37840	58	GC04M089724	25.5296	https://www.genecards.org/cgi-bin/carddisp.pl?gene=SNCA
THBD	Thrombomodulin	Protein Coding	P07204	53	GC20M023026	25.5139	https://www.genecards.org/cgi-bin/carddisp.pl?gene=THBD
GLI1	GLI Family Zinc Finger 1	Protein Coding	P08151	56	GC12P058191	25.5055	https://www.genecards.org/cgi-bin/carddisp.pl?gene=GLI1
VSIR	V-Set Immunoregulatory Receptor	Protein Coding	Q9H7M9	47	GC10M071748	25.4921	https://www.genecards.org/cgi-bin/carddisp.pl?gene=VSIR
NSMCE3	NSE3 Homolog, SMC5-SMC6 Complex Component	Protein Coding	Q96MG7	44	GC15M029839	25.4905	https://www.genecards.org/cgi-bin/carddisp.pl?gene=NSMCE3
TRAV5	T Cell Receptor Alpha Variable 5	Protein Coding	A0A0B4J249	14	GC14P021749	25.4608	https://www.genecards.org/cgi-bin/carddisp.pl?gene=TRAV5
ABCA1	ATP Binding Cassette Subfamily A Member 1	Protein Coding	O95477	55	GC09M104781	25.4494	https://www.genecards.org/cgi-bin/carddisp.pl?gene=ABCA1
HSPA8	Heat Shock Protein Family A (Hsp70) Member 8	Protein Coding	P11142	56	GC11M123057	25.4416	https://www.genecards.org/cgi-bin/carddisp.pl?gene=HSPA8
CACNA1A	Calcium Voltage-Gated Channel Subunit Alpha1 A	Protein Coding	O00555	55	GC19M013206	25.4347	https://www.genecards.org/cgi-bin/carddisp.pl?gene=CACNA1A
ELF4	E74 Like ETS Transcription Factor 4	Protein Coding	Q99607	48	GC0XM130064	25.36	https://www.genecards.org/cgi-bin/carddisp.pl?gene=ELF4
INPP5D	Inositol Polyphosphate-5-Phosphatase D	Protein Coding	Q92835	51	GC02P233059	25.3583	https://www.genecards.org/cgi-bin/carddisp.pl?gene=INPP5D
PPP3CA	Protein Phosphatase 3 Catalytic Subunit Alpha	Protein Coding	Q08209	58	GC04M101024	25.3319	https://www.genecards.org/cgi-bin/carddisp.pl?gene=PPP3CA
SP110	SP110 Nuclear Body Protein	Protein Coding	Q9HB58	46	GC02M230167	25.3305	https://www.genecards.org/cgi-bin/carddisp.pl?gene=SP110
APOB	Apolipoprotein B	Protein Coding	P04114	53	GC02M020956	25.287	https://www.genecards.org/cgi-bin/carddisp.pl?gene=APOB
SAMHD1	SAM And HD Domain Containing Deoxynucleoside Triphosphate Triphosphohydrolase 1	Protein Coding	Q9Y3Z3	50	GC20M036890	25.2813	https://www.genecards.org/cgi-bin/carddisp.pl?gene=SAMHD1
KLRG1	Killer Cell Lectin Like Receptor G1	Protein Coding	Q96E93	46	GC12P008950	25.1984	https://www.genecards.org/cgi-bin/carddisp.pl?gene=KLRG1
HLA-DRB5	Major Histocompatibility Complex, Class II, DR Beta 5	Protein Coding	Q30154	46	GC06M080965	25.1905	https://www.genecards.org/cgi-bin/carddisp.pl?gene=HLA-DRB5
P2RY1	Purinergic Receptor P2Y1	Protein Coding	P47900	53	GC03P152835	25.1884	https://www.genecards.org/cgi-bin/carddisp.pl?gene=P2RY1
CDH23	Cadherin Related 23	Protein Coding	Q9H251	52	GC10P071396	25.1649	https://www.genecards.org/cgi-bin/carddisp.pl?gene=CDH23
KMT2C	Lysine Methyltransferase 2C	Protein Coding	Q8NEZ4	51	GC07M152134	25.1628	https://www.genecards.org/cgi-bin/carddisp.pl?gene=KMT2C
CXCR1	C-X-C Motif Chemokine Receptor 1	Protein Coding	P25024	50	GC02M218162	25.1446	https://www.genecards.org/cgi-bin/carddisp.pl?gene=CXCR1
BMPR1A	Bone Morphogenetic Protein Receptor Type 1A	Protein Coding	P36894	58	GC10P098402	25.1364	https://www.genecards.org/cgi-bin/carddisp.pl?gene=BMPR1A
ZFHX3	Zinc Finger Homeobox 3	Protein Coding	Q15911	49	GC16M072782	25.1333	https://www.genecards.org/cgi-bin/carddisp.pl?gene=ZFHX3
PIGT	Phosphatidylinositol Glycan Anchor Biosynthesis Class T	Protein Coding	Q969N2	48	GC20P045416	25.1265	https://www.genecards.org/cgi-bin/carddisp.pl?gene=PIGT
ANXA2	Annexin A2	Protein Coding	P07355	54	GC15M060347	25.1119	https://www.genecards.org/cgi-bin/carddisp.pl?gene=ANXA2
CXCL9	C-X-C Motif Chemokine Ligand 9	Protein Coding	Q07325	45	GC04M076001	25.0807	https://www.genecards.org/cgi-bin/carddisp.pl?gene=CXCL9
HLA-DMA	Major Histocompatibility Complex, Class II, DM Alpha	Protein Coding	P28067	45	GC06M080991	25.0711	https://www.genecards.org/cgi-bin/carddisp.pl?gene=HLA-DMA
DOP1A	DOP1 Leucine Zipper Like Protein A	Protein Coding	Q5JWR5	40	GC06P104674	25.0601	https://www.genecards.org/cgi-bin/carddisp.pl?gene=DOP1A
NANOG	Nanog Homeobox	Protein Coding	Q9H9S0	44	GC12P007787	25.0301	https://www.genecards.org/cgi-bin/carddisp.pl?gene=NANOG
NOTCH2	Notch Receptor 2	Protein Coding	Q04721	58	GC01M119911	25.0128	https://www.genecards.org/cgi-bin/carddisp.pl?gene=NOTCH2
GFI1	Growth Factor Independent 1 Transcriptional Repressor	Protein Coding	Q99684	49	GC01M092474	24.9587	https://www.genecards.org/cgi-bin/carddisp.pl?gene=GFI1
RELN	Reelin	Protein Coding	P78509	51	GC07M103471	24.9547	https://www.genecards.org/cgi-bin/carddisp.pl?gene=RELN
DPYD	Dihydropyrimidine Dehydrogenase	Protein Coding	Q12882	58	GC01M097015	24.9361	https://www.genecards.org/cgi-bin/carddisp.pl?gene=DPYD
MGMT	O-6-Methylguanine-DNA Methyltransferase	Protein Coding	P16455	56	GC10P129467	24.9096	https://www.genecards.org/cgi-bin/carddisp.pl?gene=MGMT
MICB	MHC Class I Polypeptide-Related Sequence B	Protein Coding	Q29980	47	GC06P104093	24.8897	https://www.genecards.org/cgi-bin/carddisp.pl?gene=MICB
LPL	Lipoprotein Lipase	Protein Coding	P06858	56	GC08P019901	24.8842	https://www.genecards.org/cgi-bin/carddisp.pl?gene=LPL
FCER2	Fc Epsilon Receptor II	Protein Coding	P06734	50	GC19M009571	24.8612	https://www.genecards.org/cgi-bin/carddisp.pl?gene=FCER2
RPL11	Ribosomal Protein L11	Protein Coding	P62913	55	GC01P023691	24.7854	https://www.genecards.org/cgi-bin/carddisp.pl?gene=RPL11
TOX	Thymocyte Selection Associated High Mobility Group Box	Protein Coding	O94900	45	GC08M058805	24.7761	https://www.genecards.org/cgi-bin/carddisp.pl?gene=TOX
MEF2C	Myocyte Enhancer Factor 2C	Protein Coding	Q06413	55	GC05M088718	24.7705	https://www.genecards.org/cgi-bin/carddisp.pl?gene=MEF2C
TAL2	TAL BHLH Transcription Factor 2	Protein Coding	Q16559	41	GC09P105662	24.7649	https://www.genecards.org/cgi-bin/carddisp.pl?gene=TAL2
WRN	WRN RecQ Like Helicase	Protein Coding	Q14191	53	GC08P031033	24.7541	https://www.genecards.org/cgi-bin/carddisp.pl?gene=WRN
RNF139	Ring Finger Protein 139	Protein Coding	Q8WU17	46	GC08P124474	24.7499	https://www.genecards.org/cgi-bin/carddisp.pl?gene=RNF139
IGFBP3	Insulin Like Growth Factor Binding Protein 3	Protein Coding	P17936	53	GC07M045912	24.7347	https://www.genecards.org/cgi-bin/carddisp.pl?gene=IGFBP3
CD84	CD84 Molecule	Protein Coding	Q9UIB8	49	GC01M160541	24.734	https://www.genecards.org/cgi-bin/carddisp.pl?gene=CD84
FGF1	Fibroblast Growth Factor 1	Protein Coding	P05230	54	GC05M142555	24.7204	https://www.genecards.org/cgi-bin/carddisp.pl?gene=FGF1
PLAA	Phospholipase A2 Activating Protein	Protein Coding	Q9Y263	50	GC09M026903	24.6915	https://www.genecards.org/cgi-bin/carddisp.pl?gene=PLAA
FLI1	Fli-1 Proto-Oncogene, ETS Transcription Factor	Protein Coding	Q01543	54	GC11P128686	24.6908	https://www.genecards.org/cgi-bin/carddisp.pl?gene=FLI1
PXN	Paxillin	Protein Coding	P49023	52	GC12M120210	24.6879	https://www.genecards.org/cgi-bin/carddisp.pl?gene=PXN
DAXX	Death Domain Associated Protein	Protein Coding	Q9UER7	50	GC06M033318	24.6736	https://www.genecards.org/cgi-bin/carddisp.pl?gene=DAXX
ABCC2	ATP Binding Cassette Subfamily C Member 2	Protein Coding	Q92887	54	GC10P099782	24.6657	https://www.genecards.org/cgi-bin/carddisp.pl?gene=ABCC2
MAP3K1	Mitogen-Activated Protein Kinase Kinase Kinase 1	Protein Coding	Q13233	56	GC05P056815	24.6635	https://www.genecards.org/cgi-bin/carddisp.pl?gene=MAP3K1
TOP1	DNA Topoisomerase I	Protein Coding	P11387	56	GC20P041028	24.6581	https://www.genecards.org/cgi-bin/carddisp.pl?gene=TOP1
BST2	Bone Marrow Stromal Cell Antigen 2	Protein Coding	Q10589	45	GC19M017403	24.6493	https://www.genecards.org/cgi-bin/carddisp.pl?gene=BST2
CKS1B	CDC28 Protein Kinase Regulatory Subunit 1B	Protein Coding	P61024	48	GC01P154974	24.6331	https://www.genecards.org/cgi-bin/carddisp.pl?gene=CKS1B
F3	Coagulation Factor III, Tissue Factor	Protein Coding	P13726	52	GC01M094703	24.6298	https://www.genecards.org/cgi-bin/carddisp.pl?gene=F3
MLLT3	MLLT3 Super Elongation Complex Subunit	Protein Coding	P42568	46	GC09M020341	24.6131	https://www.genecards.org/cgi-bin/carddisp.pl?gene=MLLT3
PAX8	Paired Box 8	Protein Coding	Q06710	52	GC02M113215	24.6031	https://www.genecards.org/cgi-bin/carddisp.pl?gene=PAX8
MCM10	Minichromosome Maintenance 10 Replication Initiation Factor	Protein Coding	Q7L590	46	GC10P013161	24.5895	https://www.genecards.org/cgi-bin/carddisp.pl?gene=MCM10
NPC1	NPC Intracellular Cholesterol Transporter 1	Protein Coding	O15118	56	GC18M023506	24.5666	https://www.genecards.org/cgi-bin/carddisp.pl?gene=NPC1
MST1R	Macrophage Stimulating 1 Receptor	Protein Coding	Q04912	56	GC03M052472	24.5339	https://www.genecards.org/cgi-bin/carddisp.pl?gene=MST1R
PPP2R5A	Protein Phosphatase 2 Regulatory Subunit B'Alpha	Protein Coding	Q15172	46	GC01P212285	24.5284	https://www.genecards.org/cgi-bin/carddisp.pl?gene=PPP2R5A
ACP1	Acid Phosphatase 1	Protein Coding	P24666	50	GC02P000491	24.5226	https://www.genecards.org/cgi-bin/carddisp.pl?gene=ACP1
KLF2	KLF Transcription Factor 2	Protein Coding	Q9Y5W3	46	GC19P082804	24.5216	https://www.genecards.org/cgi-bin/carddisp.pl?gene=KLF2
LY9	Lymphocyte Antigen 9	Protein Coding	Q9HBG7	46	GC01P160796	24.5137	https://www.genecards.org/cgi-bin/carddisp.pl?gene=LY9
LATS1	Large Tumor Suppressor Kinase 1	Protein Coding	O95835	51	GC06M149658	24.5033	https://www.genecards.org/cgi-bin/carddisp.pl?gene=LATS1
TRAV3	T Cell Receptor Alpha Variable 3	Protein Coding	A0A0B4J244	14	GC14P038315	24.4953	https://www.genecards.org/cgi-bin/carddisp.pl?gene=TRAV3
DNTT	DNA Nucleotidylexotransferase	Protein Coding	P04053	48	GC10P096304	24.4876	https://www.genecards.org/cgi-bin/carddisp.pl?gene=DNTT
NEDD9	Neural Precursor Cell Expressed, Developmentally Down-Regulated 9	Protein Coding	Q14511	48	GC06M011183	24.4741	https://www.genecards.org/cgi-bin/carddisp.pl?gene=NEDD9
PKM	Pyruvate Kinase M1/2	Protein Coding	P14618	56	GC15M072199	24.474	https://www.genecards.org/cgi-bin/carddisp.pl?gene=PKM
CXCR2	C-X-C Motif Chemokine Receptor 2	Protein Coding	P25025	58	GC02P218125	24.4508	https://www.genecards.org/cgi-bin/carddisp.pl?gene=CXCR2
CTSB	Cathepsin B	Protein Coding	P07858	58	GC08M011842	24.3908	https://www.genecards.org/cgi-bin/carddisp.pl?gene=CTSB
ATF2	Activating Transcription Factor 2	Protein Coding	P15336	54	GC02M175072	24.3829	https://www.genecards.org/cgi-bin/carddisp.pl?gene=ATF2
DES	Desmin	Protein Coding	P17661	54	GC02P219418	24.3753	https://www.genecards.org/cgi-bin/carddisp.pl?gene=DES
NR1H2	Nuclear Receptor Subfamily 1 Group H Member 2	Protein Coding	P55055	53	GC19P050329	24.3597	https://www.genecards.org/cgi-bin/carddisp.pl?gene=NR1H2
ABCC8	ATP Binding Cassette Subfamily C Member 8	Protein Coding	Q09428	53	GC11M017392	24.3529	https://www.genecards.org/cgi-bin/carddisp.pl?gene=ABCC8
FH	Fumarate Hydratase	Protein Coding	P07954	53	GC01M241499	24.3512	https://www.genecards.org/cgi-bin/carddisp.pl?gene=FH
KCNJ11	Potassium Inwardly Rectifying Channel Subfamily J Member 11	Protein Coding	Q14654	53	GC11M017780	24.3398	https://www.genecards.org/cgi-bin/carddisp.pl?gene=KCNJ11
CD99	CD99 Molecule (Xg Blood Group)	Protein Coding	P14209	45	GC0XP002691	24.2809	https://www.genecards.org/cgi-bin/carddisp.pl?gene=CD99
CCL11	C-C Motif Chemokine Ligand 11	Protein Coding	P51671	52	GC17P034285	24.2742	https://www.genecards.org/cgi-bin/carddisp.pl?gene=CCL11
CHGA	Chromogranin A	Protein Coding	P10645	50	GC14P092962	24.2725	https://www.genecards.org/cgi-bin/carddisp.pl?gene=CHGA
PPP3R1	Protein Phosphatase 3 Regulatory Subunit B, Alpha	Protein Coding	P63098	51	GC02M068143	24.2608	https://www.genecards.org/cgi-bin/carddisp.pl?gene=PPP3R1
CLTC	Clathrin Heavy Chain	Protein Coding	Q00610	53	GC17P059619	24.2372	https://www.genecards.org/cgi-bin/carddisp.pl?gene=CLTC
CNOT3	CCR4-NOT Transcription Complex Subunit 3	Protein Coding	O75175	49	GC19P083890	24.215	https://www.genecards.org/cgi-bin/carddisp.pl?gene=CNOT3
AIFM1	Apoptosis Inducing Factor Mitochondria Associated 1	Protein Coding	O95831	57	GC0XM130129	24.2118	https://www.genecards.org/cgi-bin/carddisp.pl?gene=AIFM1
CACNA1H	Calcium Voltage-Gated Channel Subunit Alpha1 H	Protein Coding	O95180	56	GC16P001153	24.1995	https://www.genecards.org/cgi-bin/carddisp.pl?gene=CACNA1H
HNRNPA1	Heterogeneous Nuclear Ribonucleoprotein A1	Protein Coding	P09651	54	GC12P054280	24.1866	https://www.genecards.org/cgi-bin/carddisp.pl?gene=HNRNPA1
TBX18	T-Box Transcription Factor 18	Protein Coding	O95935	48	GC06M084687	24.1804	https://www.genecards.org/cgi-bin/carddisp.pl?gene=TBX18
CTNND1	Catenin Delta 1	Protein Coding	O60716	52	GC11P058312	24.1791	https://www.genecards.org/cgi-bin/carddisp.pl?gene=CTNND1
KLF4	KLF Transcription Factor 4	Protein Coding	O43474	53	GC09M107484	24.172	https://www.genecards.org/cgi-bin/carddisp.pl?gene=KLF4
NCK1	NCK Adaptor Protein 1	Protein Coding	P16333	50	GC03P136862	24.1607	https://www.genecards.org/cgi-bin/carddisp.pl?gene=NCK1
PPARA	Peroxisome Proliferator Activated Receptor Alpha	Protein Coding	Q07869	51	GC22P046150	24.1604	https://www.genecards.org/cgi-bin/carddisp.pl?gene=PPARA
ILF3	Interleukin Enhancer Binding Factor 3	Protein Coding	Q12906	45	GC19P011111	24.1463	https://www.genecards.org/cgi-bin/carddisp.pl?gene=ILF3
IL27	Interleukin 27	Protein Coding	Q8NEV9	44	GC16M040643	24.1414	https://www.genecards.org/cgi-bin/carddisp.pl?gene=IL27
CRK	CRK Proto-Oncogene, Adaptor Protein	Protein Coding	P46108	51	GC17M001420	24.1316	https://www.genecards.org/cgi-bin/carddisp.pl?gene=CRK
PPP2R3C	Protein Phosphatase 2 Regulatory Subunit B''Gamma	Protein Coding	Q969Q6	46	GC14M035085	24.0984	https://www.genecards.org/cgi-bin/carddisp.pl?gene=PPP2R3C
HDAC6	Histone Deacetylase 6	Protein Coding	Q9UBN7	60	GC0XP048801	24.0786	https://www.genecards.org/cgi-bin/carddisp.pl?gene=HDAC6
H2AX	H2A.X Variant Histone	Protein Coding	P16104	50	GC11M119408	24.0711	https://www.genecards.org/cgi-bin/carddisp.pl?gene=H2AX
EIF4E	Eukaryotic Translation Initiation Factor 4E	Protein Coding	P06730	56	GC04M098879	24.0708	https://www.genecards.org/cgi-bin/carddisp.pl?gene=EIF4E
ATF4	Activating Transcription Factor 4	Protein Coding	P18848	53	GC22P039519	24.0583	https://www.genecards.org/cgi-bin/carddisp.pl?gene=ATF4
ROS1	ROS Proto-Oncogene 1, Receptor Tyrosine Kinase	Protein Coding	P08922	53	GC06M117287	24.0349	https://www.genecards.org/cgi-bin/carddisp.pl?gene=ROS1
S1PR1	Sphingosine-1-Phosphate Receptor 1	Protein Coding	P21453	52	GC01P101236	24.0226	https://www.genecards.org/cgi-bin/carddisp.pl?gene=S1PR1
SOX10	SRY-Box Transcription Factor 10	Protein Coding	P56693	52	GC22M069910	24.0169	https://www.genecards.org/cgi-bin/carddisp.pl?gene=SOX10
CCNE1	Cyclin E1	Protein Coding	P24864	55	GC19P029811	24.0043	https://www.genecards.org/cgi-bin/carddisp.pl?gene=CCNE1
ERCC4	ERCC Excision Repair 4, Endonuclease Catalytic Subunit	Protein Coding	Q92889	52	GC16P013920	23.9907	https://www.genecards.org/cgi-bin/carddisp.pl?gene=ERCC4
CDK5R1	Cyclin Dependent Kinase 5 Regulatory Subunit 1	Protein Coding	Q15078	52	GC17P032486	23.9871	https://www.genecards.org/cgi-bin/carddisp.pl?gene=CDK5R1
KCNE2	Potassium Voltage-Gated Channel Subfamily E Regulatory Subunit 2	Protein Coding	Q9Y6J6	49	GC21P034364	23.9794	https://www.genecards.org/cgi-bin/carddisp.pl?gene=KCNE2
TBX15	T-Box Transcription Factor 15	Protein Coding	Q96SF7	46	GC01M118883	23.9754	https://www.genecards.org/cgi-bin/carddisp.pl?gene=TBX15
DNASE1	Deoxyribonuclease 1	Protein Coding	P24855	50	GC16P003611	23.954	https://www.genecards.org/cgi-bin/carddisp.pl?gene=DNASE1
FOSL1	FOS Like 1, AP-1 Transcription Factor Subunit	Protein Coding	P15407	52	GC11M109271	23.9431	https://www.genecards.org/cgi-bin/carddisp.pl?gene=FOSL1
SRF	Serum Response Factor	Protein Coding	P11831	50	GC06P043171	23.9154	https://www.genecards.org/cgi-bin/carddisp.pl?gene=SRF
VCL	Vinculin	Protein Coding	P18206	54	GC10P073995	23.9076	https://www.genecards.org/cgi-bin/carddisp.pl?gene=VCL
VCP	Valosin Containing Protein	Protein Coding	P55072	56	GC09M035056	23.9061	https://www.genecards.org/cgi-bin/carddisp.pl?gene=VCP
CD276	CD276 Molecule	Protein Coding	Q5ZPR3	48	GC15P073683	23.8945	https://www.genecards.org/cgi-bin/carddisp.pl?gene=CD276
RPS19	Ribosomal Protein S19	Protein Coding	P39019	55	GC19P083357	23.8939	https://www.genecards.org/cgi-bin/carddisp.pl?gene=RPS19
TRAF3	TNF Receptor Associated Factor 3	Protein Coding	Q13114	54	GC14P112076	23.8935	https://www.genecards.org/cgi-bin/carddisp.pl?gene=TRAF3
CD160	CD160 Molecule	Protein Coding	O95971	48	GC01P145719	23.891	https://www.genecards.org/cgi-bin/carddisp.pl?gene=CD160
HLA-DQA2	Major Histocompatibility Complex, Class II, DQ Alpha 2	Protein Coding	P01906	44	GC06P032741	23.8906	https://www.genecards.org/cgi-bin/carddisp.pl?gene=HLA-DQA2
PDCD4	Programmed Cell Death 4	Protein Coding	Q53EL6	49	GC10P110871	23.8758	https://www.genecards.org/cgi-bin/carddisp.pl?gene=PDCD4
CDH13	Cadherin 13	Protein Coding	P55290	51	GC16P082626	23.8729	https://www.genecards.org/cgi-bin/carddisp.pl?gene=CDH13
RARB	Retinoic Acid Receptor Beta	Protein Coding	P10826	56	GC03P024689	23.8661	https://www.genecards.org/cgi-bin/carddisp.pl?gene=RARB
BID	BH3 Interacting Domain Death Agonist	Protein Coding	P55957	53	GC22M017734	23.8371	https://www.genecards.org/cgi-bin/carddisp.pl?gene=BID
TRAV1-2	T Cell Receptor Alpha Variable 1-2	Protein Coding	A0A0B4J238	14	GC14P021642	23.8329	https://www.genecards.org/cgi-bin/carddisp.pl?gene=TRAV1-2
WDR1	WD Repeat Domain 1	Protein Coding	O75083	47	GC04M010073	23.8324	https://www.genecards.org/cgi-bin/carddisp.pl?gene=WDR1
CEACAM3	CEA Cell Adhesion Molecule 3	Protein Coding	P40198	49	GC19P041796	23.8297	https://www.genecards.org/cgi-bin/carddisp.pl?gene=CEACAM3
ZFP36L1	ZFP36 Ring Finger Protein Like 1	Protein Coding	Q07352	47	GC14M068787	23.8289	https://www.genecards.org/cgi-bin/carddisp.pl?gene=ZFP36L1
KIR3DL2	Killer Cell Immunoglobulin Like Receptor, Three Ig Domains And Long Cytoplasmic Tail 2	Protein Coding	P43630	46	GC19P083919	23.8249	https://www.genecards.org/cgi-bin/carddisp.pl?gene=KIR3DL2
PVR	PVR Cell Adhesion Molecule	Protein Coding	P15151	52	GC19P083460	23.8237	https://www.genecards.org/cgi-bin/carddisp.pl?gene=PVR
CCL20	C-C Motif Chemokine Ligand 20	Protein Coding	P78556	49	GC02P227846	23.8137	https://www.genecards.org/cgi-bin/carddisp.pl?gene=CCL20
NDUFA13	NADH:Ubiquinone Oxidoreductase Subunit A13	Protein Coding	Q9P0J0	50	GC19P019515	23.8077	https://www.genecards.org/cgi-bin/carddisp.pl?gene=NDUFA13
TNFRSF11A	TNF Receptor Superfamily Member 11a	Protein Coding	Q9Y6Q6	54	GC18P062325	23.7928	https://www.genecards.org/cgi-bin/carddisp.pl?gene=TNFRSF11A
MMP3	Matrix Metallopeptidase 3	Protein Coding	P08254	56	GC11M102835	23.7782	https://www.genecards.org/cgi-bin/carddisp.pl?gene=MMP3
ADAM12	ADAM Metallopeptidase Domain 12	Protein Coding	O43184	52	GC10M126012	23.76	https://www.genecards.org/cgi-bin/carddisp.pl?gene=ADAM12
MUC2	Mucin 2, Oligomeric Mucus/Gel-Forming	Protein Coding	Q02817	44	GC11P001074	23.7423	https://www.genecards.org/cgi-bin/carddisp.pl?gene=MUC2
CYP1B1	Cytochrome P450 Family 1 Subfamily B Member 1	Protein Coding	Q16678	55	GC02M038066	23.7382	https://www.genecards.org/cgi-bin/carddisp.pl?gene=CYP1B1
NTRK2	Neurotrophic Receptor Tyrosine Kinase 2	Protein Coding	Q16620	60	GC09P084668	23.707	https://www.genecards.org/cgi-bin/carddisp.pl?gene=NTRK2
DLG1	Discs Large MAGUK Scaffold Protein 1	Protein Coding	Q12959	50	GC03M197042	23.7046	https://www.genecards.org/cgi-bin/carddisp.pl?gene=DLG1
TF	Transferrin	Protein Coding	P02787	57	GC03P136239	23.6908	https://www.genecards.org/cgi-bin/carddisp.pl?gene=TF
CD96	CD96 Molecule	Protein Coding	P40200	50	GC03P111292	23.6799	https://www.genecards.org/cgi-bin/carddisp.pl?gene=CD96
TARDBP	TAR DNA Binding Protein	Protein Coding	Q13148	54	GC01P011013	23.6741	https://www.genecards.org/cgi-bin/carddisp.pl?gene=TARDBP
ITGB4	Integrin Subunit Beta 4	Protein Coding	P16144	56	GC17P075721	23.6683	https://www.genecards.org/cgi-bin/carddisp.pl?gene=ITGB4
FLT3LG	Fms Related Receptor Tyrosine Kinase 3 Ligand	Protein Coding	P49771	46	GC19P083647	23.6495	https://www.genecards.org/cgi-bin/carddisp.pl?gene=FLT3LG
IL10RA	Interleukin 10 Receptor Subunit Alpha	Protein Coding	Q13651	52	GC11P117987	23.6418	https://www.genecards.org/cgi-bin/carddisp.pl?gene=IL10RA
NEUROD1	Neuronal Differentiation 1	Protein Coding	Q13562	50	GC02M181673	23.6376	https://www.genecards.org/cgi-bin/carddisp.pl?gene=NEUROD1
CUL3	Cullin 3	Protein Coding	Q13618	55	GC02M224470	23.6335	https://www.genecards.org/cgi-bin/carddisp.pl?gene=CUL3
HSF1	Heat Shock Transcription Factor 1	Protein Coding	Q00613	54	GC08P144291	23.6273	https://www.genecards.org/cgi-bin/carddisp.pl?gene=HSF1
MAPK7	Mitogen-Activated Protein Kinase 7	Protein Coding	Q13164	54	GC17P076099	23.6204	https://www.genecards.org/cgi-bin/carddisp.pl?gene=MAPK7
HSPB1	Heat Shock Protein Family B (Small) Member 1	Protein Coding	P04792	58	GC07P076302	23.6185	https://www.genecards.org/cgi-bin/carddisp.pl?gene=HSPB1
TIMP2	TIMP Metallopeptidase Inhibitor 2	Protein Coding	P16035	48	GC17M078852	23.6182	https://www.genecards.org/cgi-bin/carddisp.pl?gene=TIMP2
SLC25A5	Solute Carrier Family 25 Member 5	Protein Coding	P05141	50	GC0XP119468	23.6175	https://www.genecards.org/cgi-bin/carddisp.pl?gene=SLC25A5
ITGAX	Integrin Subunit Alpha X	Protein Coding	P20702	53	GC16P047830	23.5857	https://www.genecards.org/cgi-bin/carddisp.pl?gene=ITGAX
CACNA1I	Calcium Voltage-Gated Channel Subunit Alpha1 I	Protein Coding	Q9P0X4	53	GC22P039570	23.5806	https://www.genecards.org/cgi-bin/carddisp.pl?gene=CACNA1I
TRBV28	T Cell Receptor Beta Variable 28	Protein Coding	A0A5B6	20	GC07P152146	23.5678	https://www.genecards.org/cgi-bin/carddisp.pl?gene=TRBV28
MYOD1	Myogenic Differentiation 1	Protein Coding	P15172	53	GC11P017719	23.5659	https://www.genecards.org/cgi-bin/carddisp.pl?gene=MYOD1
PPP2R5D	Protein Phosphatase 2 Regulatory Subunit B'Delta	Protein Coding	Q14738	53	GC06P104299	23.5549	https://www.genecards.org/cgi-bin/carddisp.pl?gene=PPP2R5D
IRF9	Interferon Regulatory Factor 9	Protein Coding	Q00978	50	GC14P024161	23.5537	https://www.genecards.org/cgi-bin/carddisp.pl?gene=IRF9
WRAP53	WD Repeat Containing Antisense To TP53	Protein Coding	Q9BUR4	48	GC17P013029	23.5474	https://www.genecards.org/cgi-bin/carddisp.pl?gene=WRAP53
COMT	Catechol-O-Methyltransferase	Protein Coding	P21964	58	GC22P019941	23.541	https://www.genecards.org/cgi-bin/carddisp.pl?gene=COMT
MR1	Major Histocompatibility Complex, Class I-Related	Protein Coding	Q95460	48	GC01P181033	23.5406	https://www.genecards.org/cgi-bin/carddisp.pl?gene=MR1
RIPOR2	RHO Family Interacting Cell Polarization Regulator 2	Protein Coding	Q9Y4F9	45	GC06M024861	23.5209	https://www.genecards.org/cgi-bin/carddisp.pl?gene=RIPOR2
EIF2AK2	Eukaryotic Translation Initiation Factor 2 Alpha Kinase 2	Protein Coding	P19525	57	GC02M037099	23.5072	https://www.genecards.org/cgi-bin/carddisp.pl?gene=EIF2AK2
TRAV4	T Cell Receptor Alpha Variable 4	Protein Coding	A0A0B4J268	15	GC14P038318	23.4983	https://www.genecards.org/cgi-bin/carddisp.pl?gene=TRAV4
RTEL1	Regulator Of Telomere Elongation Helicase 1	Protein Coding	Q9NZ71	48	GC20P063833	23.4872	https://www.genecards.org/cgi-bin/carddisp.pl?gene=RTEL1
CYP2A6	Cytochrome P450 Family 2 Subfamily A Member 6	Protein Coding	P11509	53	GC19M040843	23.4729	https://www.genecards.org/cgi-bin/carddisp.pl?gene=CYP2A6
ZNF180	Zinc Finger Protein 180	Protein Coding	Q9UJW8	42	GC19M079692	23.4686	https://www.genecards.org/cgi-bin/carddisp.pl?gene=ZNF180
HCFC1	Host Cell Factor C1	Protein Coding	P51610	53	GC0XM153947	23.4605	https://www.genecards.org/cgi-bin/carddisp.pl?gene=HCFC1
LCP1	Lymphocyte Cytosolic Protein 1	Protein Coding	P13796	49	GC13M046132	23.4566	https://www.genecards.org/cgi-bin/carddisp.pl?gene=LCP1
CCR9	C-C Motif Chemokine Receptor 9	Protein Coding	P51686	48	GC03P051140	23.4544	https://www.genecards.org/cgi-bin/carddisp.pl?gene=CCR9
HSPA1A	Heat Shock Protein Family A (Hsp70) Member 1A	Protein Coding	P0DMV8	53	GC06P104117	23.4505	https://www.genecards.org/cgi-bin/carddisp.pl?gene=HSPA1A
RASSF5	Ras Association Domain Family Member 5	Protein Coding	Q8WWW0	46	GC01P206507	23.4446	https://www.genecards.org/cgi-bin/carddisp.pl?gene=RASSF5
MLANA	Melan-A	Protein Coding	Q16655	47	GC09P008186	23.4432	https://www.genecards.org/cgi-bin/carddisp.pl?gene=MLANA
MYLK	Myosin Light Chain Kinase	Protein Coding	Q15746	58	GC03M123610	23.4347	https://www.genecards.org/cgi-bin/carddisp.pl?gene=MYLK
PARD3	Par-3 Family Cell Polarity Regulator	Protein Coding	Q8TEW0	48	GC10M034498	23.4272	https://www.genecards.org/cgi-bin/carddisp.pl?gene=PARD3
SLC3A2	Solute Carrier Family 3 Member 2	Protein Coding	P08195	49	GC11P062856	23.4111	https://www.genecards.org/cgi-bin/carddisp.pl?gene=SLC3A2
WWOX	WW Domain Containing Oxidoreductase	Protein Coding	Q9NZC7	52	GC16P078099	23.3969	https://www.genecards.org/cgi-bin/carddisp.pl?gene=WWOX
JAG1	Jagged Canonical Notch Ligand 1	Protein Coding	P78504	57	GC20M010637	23.3957	https://www.genecards.org/cgi-bin/carddisp.pl?gene=JAG1
GRN	Granulin Precursor	Protein Coding	P28799	54	GC17P044345	23.3946	https://www.genecards.org/cgi-bin/carddisp.pl?gene=GRN
MYL2	Myosin Light Chain 2	Protein Coding	P10916	55	GC12M110910	23.3876	https://www.genecards.org/cgi-bin/carddisp.pl?gene=MYL2
TNNT1	Troponin T1, Slow Skeletal Type	Protein Coding	P13805	49	GC19M055132	23.3842	https://www.genecards.org/cgi-bin/carddisp.pl?gene=TNNT1
FNIP1	Folliculin Interacting Protein 1	Protein Coding	Q8TF40	44	GC05M131641	23.3832	https://www.genecards.org/cgi-bin/carddisp.pl?gene=FNIP1
TAP1	Transporter 1, ATP Binding Cassette Subfamily B Member	Protein Coding	Q03518	55	GC06M080986	23.3791	https://www.genecards.org/cgi-bin/carddisp.pl?gene=TAP1
TBX4	T-Box Transcription Factor 4	Protein Coding	P57082	48	GC17P078860	23.376	https://www.genecards.org/cgi-bin/carddisp.pl?gene=TBX4
TRBV6-1	T Cell Receptor Beta Variable 6-1	Protein Coding	A0A0K0K1D8	16	GC07P152121	23.3724	https://www.genecards.org/cgi-bin/carddisp.pl?gene=TRBV6-1
FANCG	FA Complementation Group G	Protein Coding	O15287	50	GC09M035073	23.3483	https://www.genecards.org/cgi-bin/carddisp.pl?gene=FANCG
CTTN	Cortactin	Protein Coding	Q14247	50	GC11P070398	23.2991	https://www.genecards.org/cgi-bin/carddisp.pl?gene=CTTN
HMGA2	High Mobility Group AT-Hook 2	Protein Coding	P52926	50	GC12P065824	23.2964	https://www.genecards.org/cgi-bin/carddisp.pl?gene=HMGA2
SETBP1	SET Binding Protein 1	Protein Coding	Q9Y6X0	47	GC18P044680	23.2709	https://www.genecards.org/cgi-bin/carddisp.pl?gene=SETBP1
TXK	TXK Tyrosine Kinase	Protein Coding	P42681	52	GC04M048066	23.2631	https://www.genecards.org/cgi-bin/carddisp.pl?gene=TXK
CCL19	C-C Motif Chemokine Ligand 19	Protein Coding	Q99731	45	GC09M034737	23.2321	https://www.genecards.org/cgi-bin/carddisp.pl?gene=CCL19
CASP2	Caspase 2	Protein Coding	P42575	53	GC07P152183	23.2279	https://www.genecards.org/cgi-bin/carddisp.pl?gene=CASP2
ING1	Inhibitor Of Growth Family Member 1	Protein Coding	Q9UK53	50	GC13P110712	23.2179	https://www.genecards.org/cgi-bin/carddisp.pl?gene=ING1
MUC3A	Mucin 3A, Cell Surface Associated	Protein Coding	Q02505	41	GC07P100949	23.2153	https://www.genecards.org/cgi-bin/carddisp.pl?gene=MUC3A
NLRP1	NLR Family Pyrin Domain Containing 1	Protein Coding	Q9C000	50	GC17M005499	23.2093	https://www.genecards.org/cgi-bin/carddisp.pl?gene=NLRP1
STMN1	Stathmin 1	Protein Coding	P16949	51	GC01M025884	23.2089	https://www.genecards.org/cgi-bin/carddisp.pl?gene=STMN1
CD82	CD82 Molecule	Protein Coding	P27701	50	GC11P044586	23.2039	https://www.genecards.org/cgi-bin/carddisp.pl?gene=CD82
ITGA2B	Integrin Subunit Alpha 2b	Protein Coding	P08514	58	GC17M060995	23.2034	https://www.genecards.org/cgi-bin/carddisp.pl?gene=ITGA2B
STAT2	Signal Transducer And Activator Of Transcription 2	Protein Coding	P52630	55	GC12M056341	23.2009	https://www.genecards.org/cgi-bin/carddisp.pl?gene=STAT2
TRBV12-3	T Cell Receptor Beta Variable 12-3	Protein Coding	P01733	18	GC07P153250	23.1835	https://www.genecards.org/cgi-bin/carddisp.pl?gene=TRBV12-3
SLC19A1	Solute Carrier Family 19 Member 1	Protein Coding	P41440	53	GC21M045493	23.1582	https://www.genecards.org/cgi-bin/carddisp.pl?gene=SLC19A1
PMEL	Premelanosome Protein	Protein Coding	P40967	49	GC12M055954	23.1528	https://www.genecards.org/cgi-bin/carddisp.pl?gene=PMEL
AGER	Advanced Glycosylation End-Product Specific Receptor	Protein Coding	Q15109	53	GC06M032180	23.1517	https://www.genecards.org/cgi-bin/carddisp.pl?gene=AGER
NR4A1	Nuclear Receptor Subfamily 4 Group A Member 1	Protein Coding	P22736	54	GC12P052022	23.1508	https://www.genecards.org/cgi-bin/carddisp.pl?gene=NR4A1
BARD1	BRCA1 Associated RING Domain 1	Protein Coding	Q99728	54	GC02M214725	23.1343	https://www.genecards.org/cgi-bin/carddisp.pl?gene=BARD1
ANGPT2	Angiopoietin 2	Protein Coding	O15123	56	GC08M006499	23.1278	https://www.genecards.org/cgi-bin/carddisp.pl?gene=ANGPT2
NES	Nestin	Protein Coding	P48681	47	GC01M156668	23.0911	https://www.genecards.org/cgi-bin/carddisp.pl?gene=NES
OSM	Oncostatin M	Protein Coding	P13725	50	GC22M030262	23.0828	https://www.genecards.org/cgi-bin/carddisp.pl?gene=OSM
TPO	Thyroid Peroxidase	Protein Coding	P07202	55	GC02P001374	23.0742	https://www.genecards.org/cgi-bin/carddisp.pl?gene=TPO
CTNND2	Catenin Delta 2	Protein Coding	Q9UQB3	49	GC05M010971	23.0719	https://www.genecards.org/cgi-bin/carddisp.pl?gene=CTNND2
EBF1	EBF Transcription Factor 1	Protein Coding	Q9UH73	47	GC05M158695	23.0543	https://www.genecards.org/cgi-bin/carddisp.pl?gene=EBF1
PPP2R2C	Protein Phosphatase 2 Regulatory Subunit Bgamma	Protein Coding	Q9Y2T4	48	GC04M006322	23.0428	https://www.genecards.org/cgi-bin/carddisp.pl?gene=PPP2R2C
EIF4EBP1	Eukaryotic Translation Initiation Factor 4E Binding Protein 1	Protein Coding	Q13541	53	GC08P038813	23.036	https://www.genecards.org/cgi-bin/carddisp.pl?gene=EIF4EBP1
GSN	Gelsolin	Protein Coding	P06396	56	GC09P121201	23.035	https://www.genecards.org/cgi-bin/carddisp.pl?gene=GSN
CAV3	Caveolin 3	Protein Coding	P56539	49	GC03P008733	23.0152	https://www.genecards.org/cgi-bin/carddisp.pl?gene=CAV3
IFNGR1	Interferon Gamma Receptor 1	Protein Coding	P15260	58	GC06M137197	23.0137	https://www.genecards.org/cgi-bin/carddisp.pl?gene=IFNGR1
CTSD	Cathepsin D	Protein Coding	P07339	60	GC11M001752	23.0117	https://www.genecards.org/cgi-bin/carddisp.pl?gene=CTSD
MYOG	Myogenin	Protein Coding	P15173	46	GC01M203083	23.0059	https://www.genecards.org/cgi-bin/carddisp.pl?gene=MYOG
CDKN1C	Cyclin Dependent Kinase Inhibitor 1C	Protein Coding	P49918	52	GC11M008066	22.9992	https://www.genecards.org/cgi-bin/carddisp.pl?gene=CDKN1C
GADD45A	Growth Arrest And DNA Damage Inducible Alpha	Protein Coding	P24522	50	GC01P067685	22.9862	https://www.genecards.org/cgi-bin/carddisp.pl?gene=GADD45A
DRD4	Dopamine Receptor D4	Protein Coding	P21917	52	GC11P002861	22.985	https://www.genecards.org/cgi-bin/carddisp.pl?gene=DRD4
CLEC7A	C-Type Lectin Domain Containing 7A	Protein Coding	Q9BXN2	53	GC12M024902	22.9585	https://www.genecards.org/cgi-bin/carddisp.pl?gene=CLEC7A
BRIP1	BRCA1 Interacting Helicase 1	Protein Coding	Q9BX63	56	GC17M061679	22.9494	https://www.genecards.org/cgi-bin/carddisp.pl?gene=BRIP1
APOA1	Apolipoprotein A1	Protein Coding	P02647	57	GC11M116835	22.9478	https://www.genecards.org/cgi-bin/carddisp.pl?gene=APOA1
RRM2B	Ribonucleotide Reductase Regulatory TP53 Inducible Subunit M2B	Protein Coding	Q7LG56	56	GC08M102204	22.9382	https://www.genecards.org/cgi-bin/carddisp.pl?gene=RRM2B
KLF6	KLF Transcription Factor 6	Protein Coding	Q99612	50	GC10M003779	22.9353	https://www.genecards.org/cgi-bin/carddisp.pl?gene=KLF6
CCNH	Cyclin H	Protein Coding	P51946	53	GC05M087311	22.9337	https://www.genecards.org/cgi-bin/carddisp.pl?gene=CCNH
TRAV2	T Cell Receptor Alpha Variable 2	Protein Coding	A0A0B4J234	15	GC14P021712	22.9327	https://www.genecards.org/cgi-bin/carddisp.pl?gene=TRAV2
LYL1	LYL1 Basic Helix-Loop-Helix Family Member	Protein Coding	P12980	45	GC19M015501	22.9289	https://www.genecards.org/cgi-bin/carddisp.pl?gene=LYL1
TIMP1	TIMP Metallopeptidase Inhibitor 1	Protein Coding	P01033	52	GC0XP047922	22.9266	https://www.genecards.org/cgi-bin/carddisp.pl?gene=TIMP1
CD48	CD48 Molecule	Protein Coding	P09326	48	GC01M160648	22.9164	https://www.genecards.org/cgi-bin/carddisp.pl?gene=CD48
TYMP	Thymidine Phosphorylase	Protein Coding	P19971	54	GC22M050525	22.9118	https://www.genecards.org/cgi-bin/carddisp.pl?gene=TYMP
RPS27A	Ribosomal Protein S27a	Protein Coding	P62979	49	GC02P055231	22.9044	https://www.genecards.org/cgi-bin/carddisp.pl?gene=RPS27A
AFP	Alpha Fetoprotein	Protein Coding	P02771	54	GC04P073431	22.8898	https://www.genecards.org/cgi-bin/carddisp.pl?gene=AFP
RORA	RAR Related Orphan Receptor A	Protein Coding	P35398	55	GC15M060488	22.8812	https://www.genecards.org/cgi-bin/carddisp.pl?gene=RORA
WNT5A	Wnt Family Member 5A	Protein Coding	P41221	58	GC03M055465	22.8809	https://www.genecards.org/cgi-bin/carddisp.pl?gene=WNT5A
FLT4	Fms Related Receptor Tyrosine Kinase 4	Protein Coding	P35916	59	GC05M182184	22.8798	https://www.genecards.org/cgi-bin/carddisp.pl?gene=FLT4
KRT7	Keratin 7	Protein Coding	P08729	48	GC12P052232	22.8732	https://www.genecards.org/cgi-bin/carddisp.pl?gene=KRT7
PLAG1	PLAG1 Zinc Finger	Protein Coding	Q6DJT9	48	GC08M056470	22.8558	https://www.genecards.org/cgi-bin/carddisp.pl?gene=PLAG1
SLC2A4	Solute Carrier Family 2 Member 4	Protein Coding	P14672	53	GC17P012995	22.8392	https://www.genecards.org/cgi-bin/carddisp.pl?gene=SLC2A4
ACTG1	Actin Gamma 1	Protein Coding	P63261	54	GC17M081509	22.7948	https://www.genecards.org/cgi-bin/carddisp.pl?gene=ACTG1
CD200	CD200 Molecule	Protein Coding	P41217	47	GC03P112332	22.7844	https://www.genecards.org/cgi-bin/carddisp.pl?gene=CD200
FBN1	Fibrillin 1	Protein Coding	P35555	54	GC15M048408	22.7823	https://www.genecards.org/cgi-bin/carddisp.pl?gene=FBN1
HSPD1	Heat Shock Protein Family D (Hsp60) Member 1	Protein Coding	P10809	56	GC02M197486	22.7737	https://www.genecards.org/cgi-bin/carddisp.pl?gene=HSPD1
CSNK2A1	Casein Kinase 2 Alpha 1	Protein Coding	P68400	57	GC20M000472	22.7614	https://www.genecards.org/cgi-bin/carddisp.pl?gene=CSNK2A1
IL17F	Interleukin 17F	Protein Coding	Q96PD4	49	GC06M081266	22.7592	https://www.genecards.org/cgi-bin/carddisp.pl?gene=IL17F
PPP2R5E	Protein Phosphatase 2 Regulatory Subunit B'Epsilon	Protein Coding	Q16537	46	GC14M063371	22.7454	https://www.genecards.org/cgi-bin/carddisp.pl?gene=PPP2R5E
CASP7	Caspase 7	Protein Coding	P55210	56	GC10P113679	22.7411	https://www.genecards.org/cgi-bin/carddisp.pl?gene=CASP7
CXCL11	C-X-C Motif Chemokine Ligand 11	Protein Coding	O14625	47	GC04M076033	22.738	https://www.genecards.org/cgi-bin/carddisp.pl?gene=CXCL11
PSAP	Prosaposin	Protein Coding	P07602	55	GC10M071816	22.7314	https://www.genecards.org/cgi-bin/carddisp.pl?gene=PSAP
FCGR3B	Fc Gamma Receptor IIIb	Protein Coding	O75015	50	GC01M161623	22.7285	https://www.genecards.org/cgi-bin/carddisp.pl?gene=FCGR3B
NHERF1	NHERF Family PDZ Scaffold Protein 1	Protein Coding	O14745	52	GC17P079267	22.715	https://www.genecards.org/cgi-bin/carddisp.pl?gene=NHERF1
MEF2A	Myocyte Enhancer Factor 2A	Protein Coding	Q02078	52	GC15P099565	22.6963	https://www.genecards.org/cgi-bin/carddisp.pl?gene=MEF2A
NKX2-5	NK2 Homeobox 5	Protein Coding	P52952	52	GC05M173232	22.6903	https://www.genecards.org/cgi-bin/carddisp.pl?gene=NKX2-5
TBL1XR1	TBL1X/Y Related 1	Protein Coding	Q9BZK7	52	GC03M177019	22.6722	https://www.genecards.org/cgi-bin/carddisp.pl?gene=TBL1XR1
HCST	Hematopoietic Cell Signal Transducer	Protein Coding	Q9UBK5	42	GC19P083168	22.6665	https://www.genecards.org/cgi-bin/carddisp.pl?gene=HCST
GCK	Glucokinase	Protein Coding	P35557	56	GC07M044807	22.6377	https://www.genecards.org/cgi-bin/carddisp.pl?gene=GCK
YWHAQ	Tyrosine 3-Monooxygenase/Tryptophan 5-Monooxygenase Activation Protein Theta	Protein Coding	P27348	53	GC02M009583	22.6318	https://www.genecards.org/cgi-bin/carddisp.pl?gene=YWHAQ
KRT8	Keratin 8	Protein Coding	P05787	53	GC12M052897	22.6154	https://www.genecards.org/cgi-bin/carddisp.pl?gene=KRT8
L1CAM	L1 Cell Adhesion Molecule	Protein Coding	P32004	54	GC0XM153864	22.6101	https://www.genecards.org/cgi-bin/carddisp.pl?gene=L1CAM
TREML2	Triggering Receptor Expressed On Myeloid Cells Like 2	Protein Coding	Q5T2D2	45	GC06M081115	22.6018	https://www.genecards.org/cgi-bin/carddisp.pl?gene=TREML2
POLR1C	RNA Polymerase I And III Subunit C	Protein Coding	O15160	51	GC06P104306	22.5977	https://www.genecards.org/cgi-bin/carddisp.pl?gene=POLR1C
CCN2	Cellular Communication Network Factor 2	Protein Coding	P29279	53	GC06M131948	22.5969	https://www.genecards.org/cgi-bin/carddisp.pl?gene=CCN2
CYP3A4	Cytochrome P450 Family 3 Subfamily A Member 4	Protein Coding	P08684	55	GC07M099773	22.5898	https://www.genecards.org/cgi-bin/carddisp.pl?gene=CYP3A4
ITGB7	Integrin Subunit Beta 7	Protein Coding	P26010	52	GC12M053191	22.5892	https://www.genecards.org/cgi-bin/carddisp.pl?gene=ITGB7
GPC3	Glypican 3	Protein Coding	P51654	53	GC0XM133535	22.5859	https://www.genecards.org/cgi-bin/carddisp.pl?gene=GPC3
PLA2G6	Phospholipase A2 Group VI	Protein Coding	O60733	54	GC22M069811	22.5685	https://www.genecards.org/cgi-bin/carddisp.pl?gene=PLA2G6
CALCA	Calcitonin Related Polypeptide Alpha	Protein Coding	P06881	49	GC11M014966	22.5661	https://www.genecards.org/cgi-bin/carddisp.pl?gene=CALCA
PAX2	Paired Box 2	Protein Coding	Q02962	53	GC10P100735	22.5596	https://www.genecards.org/cgi-bin/carddisp.pl?gene=PAX2
CXADR	CXADR Ig-Like Cell Adhesion Molecule	Protein Coding	P78310	50	GC21P017513	22.4975	https://www.genecards.org/cgi-bin/carddisp.pl?gene=CXADR
PRKG1	Protein Kinase CGMP-Dependent 1	Protein Coding	Q13976	57	GC10P050991	22.4967	https://www.genecards.org/cgi-bin/carddisp.pl?gene=PRKG1
IL27RA	Interleukin 27 Receptor Subunit Alpha	Protein Coding	Q6UWB1	48	GC19P014031	22.4966	https://www.genecards.org/cgi-bin/carddisp.pl?gene=IL27RA
BLK	BLK Proto-Oncogene, Src Family Tyrosine Kinase	Protein Coding	P51451	56	GC08P011486	22.4932	https://www.genecards.org/cgi-bin/carddisp.pl?gene=BLK
DTNBP1	Dystrobrevin Binding Protein 1	Protein Coding	Q96EV8	49	GC06M015553	22.4831	https://www.genecards.org/cgi-bin/carddisp.pl?gene=DTNBP1
PRKCH	Protein Kinase C Eta	Protein Coding	P24723	56	GC14P061187	22.4628	https://www.genecards.org/cgi-bin/carddisp.pl?gene=PRKCH
TFAP2A	Transcription Factor AP-2 Alpha	Protein Coding	P05549	54	GC06M010393	22.4582	https://www.genecards.org/cgi-bin/carddisp.pl?gene=TFAP2A
GNLY	Granulysin	Protein Coding	P22749	44	GC02P085685	22.4488	https://www.genecards.org/cgi-bin/carddisp.pl?gene=GNLY
TNFSF14	TNF Superfamily Member 14	Protein Coding	O43557	48	GC19M009497	22.4485	https://www.genecards.org/cgi-bin/carddisp.pl?gene=TNFSF14
PPARGC1A	PPARG Coactivator 1 Alpha	Protein Coding	Q9UBK2	54	GC04M023755	22.4452	https://www.genecards.org/cgi-bin/carddisp.pl?gene=PPARGC1A
SALL2	Spalt Like Transcription Factor 2	Protein Coding	Q9Y467	48	GC14M021521	22.4355	https://www.genecards.org/cgi-bin/carddisp.pl?gene=SALL2
RBL1	RB Transcriptional Corepressor Like 1	Protein Coding	P28749	48	GC20M036996	22.429	https://www.genecards.org/cgi-bin/carddisp.pl?gene=RBL1
SNAI2	Snail Family Transcriptional Repressor 2	Protein Coding	O43623	51	GC08M048917	22.4271	https://www.genecards.org/cgi-bin/carddisp.pl?gene=SNAI2
NECTIN2	Nectin Cell Adhesion Molecule 2	Protein Coding	Q92692	51	GC19P083470	22.4093	https://www.genecards.org/cgi-bin/carddisp.pl?gene=NECTIN2
H3-3A	H3.3 Histone A	Protein Coding	P84243	49	GC01P226062	22.4016	https://www.genecards.org/cgi-bin/carddisp.pl?gene=H3-3A
CD68	CD68 Molecule	Protein Coding	P34810	46	GC17P007579	22.3993	https://www.genecards.org/cgi-bin/carddisp.pl?gene=CD68
SUFU	SUFU Negative Regulator Of Hedgehog Signaling	Protein Coding	Q9UMX1	50	GC10P102503	22.3959	https://www.genecards.org/cgi-bin/carddisp.pl?gene=SUFU
CD1E	CD1e Molecule	Protein Coding	P15812	44	GC01P158354	22.3867	https://www.genecards.org/cgi-bin/carddisp.pl?gene=CD1E
PPP1CB	Protein Phosphatase 1 Catalytic Subunit Beta	Protein Coding	P62140	53	GC02P028753	22.3783	https://www.genecards.org/cgi-bin/carddisp.pl?gene=PPP1CB
GSTP1	Glutathione S-Transferase Pi 1	Protein Coding	P09211	57	GC11P067583	22.3772	https://www.genecards.org/cgi-bin/carddisp.pl?gene=GSTP1
CALM3	Calmodulin 3	Protein Coding	P0DP25	49	GC19P046601	22.3763	https://www.genecards.org/cgi-bin/carddisp.pl?gene=CALM3
MDK	Midkine	Protein Coding	P21741	50	GC11P046380	22.3621	https://www.genecards.org/cgi-bin/carddisp.pl?gene=MDK
SIN3A	SIN3 Transcription Regulator Family Member A	Protein Coding	Q96ST3	53	GC15M075369	22.355	https://www.genecards.org/cgi-bin/carddisp.pl?gene=SIN3A
PI4KA	Phosphatidylinositol 4-Kinase Alpha	Protein Coding	P42356	55	GC22M020707	22.3393	https://www.genecards.org/cgi-bin/carddisp.pl?gene=PI4KA
IL12RB2	Interleukin 12 Receptor Subunit Beta 2	Protein Coding	Q99665	50	GC01P067307	22.3292	https://www.genecards.org/cgi-bin/carddisp.pl?gene=IL12RB2
CIB1	Calcium And Integrin Binding 1	Protein Coding	Q99828	49	GC15M090229	22.3231	https://www.genecards.org/cgi-bin/carddisp.pl?gene=CIB1
ODC1	Ornithine Decarboxylase 1	Protein Coding	P11926	55	GC02M010432	22.3128	https://www.genecards.org/cgi-bin/carddisp.pl?gene=ODC1
GLUL	Glutamate-Ammonia Ligase	Protein Coding	P15104	55	GC01M182378	22.2958	https://www.genecards.org/cgi-bin/carddisp.pl?gene=GLUL
CENPT	Centromere Protein T	Protein Coding	Q96BT3	44	GC16M067828	22.2898	https://www.genecards.org/cgi-bin/carddisp.pl?gene=CENPT
IRAK1	Interleukin 1 Receptor Associated Kinase 1	Protein Coding	P51617	56	GC0XM154010	22.2881	https://www.genecards.org/cgi-bin/carddisp.pl?gene=IRAK1
ARID2	AT-Rich Interaction Domain 2	Protein Coding	Q68CP9	48	GC12P045729	22.282	https://www.genecards.org/cgi-bin/carddisp.pl?gene=ARID2
GHR	Growth Hormone Receptor	Protein Coding	P10912	53	GC05P042429	22.2758	https://www.genecards.org/cgi-bin/carddisp.pl?gene=GHR
KHSRP	KH-Type Splicing Regulatory Protein	Protein Coding	Q92945	48	GC19M006413	22.2757	https://www.genecards.org/cgi-bin/carddisp.pl?gene=KHSRP
C4A	Complement C4A (Rodgers Blood Group)	Protein Coding	P0C0L4	50	GC06P104121	22.2656	https://www.genecards.org/cgi-bin/carddisp.pl?gene=C4A
DAPK1	Death Associated Protein Kinase 1	Protein Coding	P53355	56	GC09P087497	22.2568	https://www.genecards.org/cgi-bin/carddisp.pl?gene=DAPK1
TREM1	Triggering Receptor Expressed On Myeloid Cells 1	Protein Coding	Q9NP99	49	GC06M041267	22.2456	https://www.genecards.org/cgi-bin/carddisp.pl?gene=TREM1
FSCN1	Fascin Actin-Bundling Protein 1	Protein Coding	Q16658	50	GC07P005592	22.2346	https://www.genecards.org/cgi-bin/carddisp.pl?gene=FSCN1
TLX2	T Cell Leukemia Homeobox 2	Protein Coding	O43763	44	GC02P074655	22.2262	https://www.genecards.org/cgi-bin/carddisp.pl?gene=TLX2
NR5A1	Nuclear Receptor Subfamily 5 Group A Member 1	Protein Coding	Q13285	56	GC09M124481	22.225	https://www.genecards.org/cgi-bin/carddisp.pl?gene=NR5A1
MUTYH	MutY DNA Glycosylase	Protein Coding	Q9UIF7	52	GC01M045329	22.2058	https://www.genecards.org/cgi-bin/carddisp.pl?gene=MUTYH
APEX1	Apurinic/Apyrimidinic Endodeoxyribonuclease 1	Protein Coding	P27695	52	GC14P020455	22.204	https://www.genecards.org/cgi-bin/carddisp.pl?gene=APEX1
EPHB2	EPH Receptor B2	Protein Coding	P29323	59	GC01P022710	22.2023	https://www.genecards.org/cgi-bin/carddisp.pl?gene=EPHB2
ATRX	ATRX Chromatin Remodeler	Protein Coding	P46100	53	GC0XM077504	22.1979	https://www.genecards.org/cgi-bin/carddisp.pl?gene=ATRX
SFN	Stratifin	Protein Coding	P31947	53	GC01P029478	22.1976	https://www.genecards.org/cgi-bin/carddisp.pl?gene=SFN
PRKAA1	Protein Kinase AMP-Activated Catalytic Subunit Alpha 1	Protein Coding	Q13131	53	GC05M040759	22.1967	https://www.genecards.org/cgi-bin/carddisp.pl?gene=PRKAA1
TRBV7-2	T Cell Receptor Beta Variable 7-2	Protein Coding	A0A1B0GXF2	12	GC07P153273	22.1952	https://www.genecards.org/cgi-bin/carddisp.pl?gene=TRBV7-2
GLB1	Galactosidase Beta 1	Protein Coding	P16278	56	GC03M032963	22.1609	https://www.genecards.org/cgi-bin/carddisp.pl?gene=GLB1
TBR1	T-Box Brain Transcription Factor 1	Protein Coding	Q16650	48	GC02P161416	22.1599	https://www.genecards.org/cgi-bin/carddisp.pl?gene=TBR1
EPB41L3	Erythrocyte Membrane Protein Band 4.1 Like 3	Protein Coding	Q9Y2J2	49	GC18M005392	22.1551	https://www.genecards.org/cgi-bin/carddisp.pl?gene=EPB41L3
FANCM	FA Complementation Group M	Protein Coding	Q8IYD8	49	GC14P045135	22.1537	https://www.genecards.org/cgi-bin/carddisp.pl?gene=FANCM
GRAP2	GRB2 Related Adaptor Protein 2	Protein Coding	O75791	49	GC22P052493	22.1514	https://www.genecards.org/cgi-bin/carddisp.pl?gene=GRAP2
PSMB9	Proteasome 20S Subunit Beta 9	Protein Coding	P28065	53	GC06P104131	22.1483	https://www.genecards.org/cgi-bin/carddisp.pl?gene=PSMB9
ITCH	Itchy E3 Ubiquitin Protein Ligase	Protein Coding	Q96J02	54	GC20P034363	22.1302	https://www.genecards.org/cgi-bin/carddisp.pl?gene=ITCH
PTPRT	Protein Tyrosine Phosphatase Receptor Type T	Protein Coding	O14522	50	GC20M042072	22.1258	https://www.genecards.org/cgi-bin/carddisp.pl?gene=PTPRT
NR4A2	Nuclear Receptor Subfamily 4 Group A Member 2	Protein Coding	P43354	53	GC02M156324	22.1201	https://www.genecards.org/cgi-bin/carddisp.pl?gene=NR4A2
PHB1	Prohibitin 1	Protein Coding	P35232	52	GC17M061304	22.1192	https://www.genecards.org/cgi-bin/carddisp.pl?gene=PHB1
CDC5L	Cell Division Cycle 5 Like	Protein Coding	Q99459	46	GC06P044387	22.0875	https://www.genecards.org/cgi-bin/carddisp.pl?gene=CDC5L
PTGER4	Prostaglandin E Receptor 4	Protein Coding	P35408	53	GC05P040679	22.0822	https://www.genecards.org/cgi-bin/carddisp.pl?gene=PTGER4
AICDA	Activation Induced Cytidine Deaminase	Protein Coding	Q9GZX7	50	GC12M008602	22.0703	https://www.genecards.org/cgi-bin/carddisp.pl?gene=AICDA
TLR5	Toll Like Receptor 5	Protein Coding	O60602	53	GC01M223109	22.0567	https://www.genecards.org/cgi-bin/carddisp.pl?gene=TLR5
SERPINA3	Serpin Family A Member 3	Protein Coding	P01011	50	GC14P094612	22.0532	https://www.genecards.org/cgi-bin/carddisp.pl?gene=SERPINA3
ID2	Inhibitor Of DNA Binding 2	Protein Coding	Q02363	51	GC02P008678	22.0258	https://www.genecards.org/cgi-bin/carddisp.pl?gene=ID2
RHOD	Ras Homolog Family Member D	Protein Coding	O00212	44	GC11P073028	22.0246	https://www.genecards.org/cgi-bin/carddisp.pl?gene=RHOD
FGF7	Fibroblast Growth Factor 7	Protein Coding	P21781	50	GC15P049423	22.0118	https://www.genecards.org/cgi-bin/carddisp.pl?gene=FGF7
SDC1	Syndecan 1	Protein Coding	P18827	49	GC02M020200	21.996	https://www.genecards.org/cgi-bin/carddisp.pl?gene=SDC1
TKT	Transketolase	Protein Coding	P29401	52	GC03M053224	21.9947	https://www.genecards.org/cgi-bin/carddisp.pl?gene=TKT
SMARCA2	SWI/SNF Related, Matrix Associated, Actin Dependent Regulator Of Chromatin, Subfamily A, Member 2	Protein Coding	P51531	57	GC09P001980	21.9838	https://www.genecards.org/cgi-bin/carddisp.pl?gene=SMARCA2
CDKAL1	CDK5 Regulatory Subunit Associated Protein 1 Like 1	Protein Coding	Q5VV42	46	GC06P020534	21.9788	https://www.genecards.org/cgi-bin/carddisp.pl?gene=CDKAL1
ACTN4	Actinin Alpha 4	Protein Coding	O43707	53	GC19P038647	21.9516	https://www.genecards.org/cgi-bin/carddisp.pl?gene=ACTN4
ERCC5	ERCC Excision Repair 5, Endonuclease	Protein Coding	P28715	52	GC13P102845	21.9478	https://www.genecards.org/cgi-bin/carddisp.pl?gene=ERCC5
IGF2R	Insulin Like Growth Factor 2 Receptor	Protein Coding	P11717	53	GC06P159969	21.9292	https://www.genecards.org/cgi-bin/carddisp.pl?gene=IGF2R
ATF1	Activating Transcription Factor 1	Protein Coding	P18846	52	GC12P050763	21.9277	https://www.genecards.org/cgi-bin/carddisp.pl?gene=ATF1
AMT	Aminomethyltransferase	Protein Coding	P48728	50	GC03M052430	21.9274	https://www.genecards.org/cgi-bin/carddisp.pl?gene=AMT
MYRF	Myelin Regulatory Factor	Protein Coding	Q9Y2G1	45	GC11P061753	21.9138	https://www.genecards.org/cgi-bin/carddisp.pl?gene=MYRF
XRCC3	X-Ray Repair Cross Complementing 3	Protein Coding	O43542	49	GC14M103697	21.9078	https://www.genecards.org/cgi-bin/carddisp.pl?gene=XRCC3
HPS4	HPS4 Biogenesis Of Lysosomal Organelles Complex 3 Subunit 2	Protein Coding	Q9NQG7	46	GC22M026443	21.9073	https://www.genecards.org/cgi-bin/carddisp.pl?gene=HPS4
HLA-DRB3	Major Histocompatibility Complex, Class II, DR Beta 3	Protein Coding	P79483	33	GC06Mn03715	21.9035	https://www.genecards.org/cgi-bin/carddisp.pl?gene=HLA-DRB3
B3GAT1	Beta-1,3-Glucuronyltransferase 1	Protein Coding	Q9P2W7	50	GC11M134378	21.9022	https://www.genecards.org/cgi-bin/carddisp.pl?gene=B3GAT1
ENO1	Enolase 1	Protein Coding	P06733	54	GC01M008861	21.8965	https://www.genecards.org/cgi-bin/carddisp.pl?gene=ENO1
TTN	Titin	Protein Coding	Q8WZ42	54	GC02M178525	21.893	https://www.genecards.org/cgi-bin/carddisp.pl?gene=TTN
TCF4	Transcription Factor 4	Protein Coding	P15884	54	GC18M055222	21.8899	https://www.genecards.org/cgi-bin/carddisp.pl?gene=TCF4
POLD1	DNA Polymerase Delta 1, Catalytic Subunit	Protein Coding	P28340	53	GC19P083707	21.8886	https://www.genecards.org/cgi-bin/carddisp.pl?gene=POLD1
CD151	CD151 Molecule (Raph Blood Group)	Protein Coding	P48509	50	GC11P002897	21.8779	https://www.genecards.org/cgi-bin/carddisp.pl?gene=CD151
MCAM	Melanoma Cell Adhesion Molecule	Protein Coding	P43121	48	GC11M119308	21.8758	https://www.genecards.org/cgi-bin/carddisp.pl?gene=MCAM
BUB1	BUB1 Mitotic Checkpoint Serine/Threonine Kinase	Protein Coding	O43683	56	GC02M110637	21.8678	https://www.genecards.org/cgi-bin/carddisp.pl?gene=BUB1
PPP1R8	Protein Phosphatase 1 Regulatory Subunit 8	Protein Coding	Q12972	46	GC01P027830	21.8513	https://www.genecards.org/cgi-bin/carddisp.pl?gene=PPP1R8
AXIN1	Axin 1	Protein Coding	O15169	53	GC16M000287	21.8419	https://www.genecards.org/cgi-bin/carddisp.pl?gene=AXIN1
FOXC1	Forkhead Box C1	Protein Coding	Q12948	49	GC06P001610	21.8419	https://www.genecards.org/cgi-bin/carddisp.pl?gene=FOXC1
ANK1	Ankyrin 1	Protein Coding	P16157	52	GC08M041653	21.8342	https://www.genecards.org/cgi-bin/carddisp.pl?gene=ANK1
RACK1	Receptor For Activated C Kinase 1	Protein Coding	P63244	50	GC05M182224	21.8258	https://www.genecards.org/cgi-bin/carddisp.pl?gene=RACK1
TBX10	T-Box Transcription Factor 10	Protein Coding	O75333	41	GC11M067631	21.7998	https://www.genecards.org/cgi-bin/carddisp.pl?gene=TBX10
FOXM1	Forkhead Box M1	Protein Coding	Q08050	50	GC12M002857	21.7994	https://www.genecards.org/cgi-bin/carddisp.pl?gene=FOXM1
LAMC2	Laminin Subunit Gamma 2	Protein Coding	Q13753	54	GC01P183186	21.7918	https://www.genecards.org/cgi-bin/carddisp.pl?gene=LAMC2
SLC2A2	Solute Carrier Family 2 Member 2	Protein Coding	P11168	56	GC03M170996	21.7859	https://www.genecards.org/cgi-bin/carddisp.pl?gene=SLC2A2
IFI27	Interferon Alpha Inducible Protein 27	Protein Coding	P40305	45	GC14P094104	21.7705	https://www.genecards.org/cgi-bin/carddisp.pl?gene=IFI27
ERG	ETS Transcription Factor ERG	Protein Coding	P11308	53	GC21M038367	21.769	https://www.genecards.org/cgi-bin/carddisp.pl?gene=ERG
RPS24	Ribosomal Protein S24	Protein Coding	P62847	50	GC10P078033	21.7575	https://www.genecards.org/cgi-bin/carddisp.pl?gene=RPS24
CYP19A1	Cytochrome P450 Family 19 Subfamily A Member 1	Protein Coding	P11511	56	GC15M051208	21.7558	https://www.genecards.org/cgi-bin/carddisp.pl?gene=CYP19A1
HBEGF	Heparin Binding EGF Like Growth Factor	Protein Coding	Q99075	50	GC05M140332	21.7552	https://www.genecards.org/cgi-bin/carddisp.pl?gene=HBEGF
CEACAM6	CEA Cell Adhesion Molecule 6	Protein Coding	P40199	48	GC19P041750	21.7508	https://www.genecards.org/cgi-bin/carddisp.pl?gene=CEACAM6
KHDRBS1	KH RNA Binding Domain Containing, Signal Transduction Associated 1	Protein Coding	Q07666	47	GC01P032013	21.7503	https://www.genecards.org/cgi-bin/carddisp.pl?gene=KHDRBS1
VIP	Vasoactive Intestinal Peptide	Protein Coding	P01282	51	GC06P152750	21.7381	https://www.genecards.org/cgi-bin/carddisp.pl?gene=VIP
RASSF1	Ras Association Domain Family Member 1	Protein Coding	Q9NS23	49	GC03M050329	21.7248	https://www.genecards.org/cgi-bin/carddisp.pl?gene=RASSF1
PAFAH1B1	Platelet Activating Factor Acetylhydrolase 1b Regulatory Subunit 1	Protein Coding	P43034	54	GC17P002593	21.7238	https://www.genecards.org/cgi-bin/carddisp.pl?gene=PAFAH1B1
CAMK2G	Calcium/Calmodulin Dependent Protein Kinase II Gamma	Protein Coding	Q13555	54	GC10M073812	21.7058	https://www.genecards.org/cgi-bin/carddisp.pl?gene=CAMK2G
CDC6	Cell Division Cycle 6	Protein Coding	Q99741	52	GC17P040287	21.6978	https://www.genecards.org/cgi-bin/carddisp.pl?gene=CDC6
TAP2	Transporter 2, ATP Binding Cassette Subfamily B Member	Protein Coding	Q03519	51	GC06M032821	21.6932	https://www.genecards.org/cgi-bin/carddisp.pl?gene=TAP2
SH2D2A	SH2 Domain Containing 2A	Protein Coding	Q9NP31	45	GC01M157086	21.691	https://www.genecards.org/cgi-bin/carddisp.pl?gene=SH2D2A
RBL2	RB Transcriptional Corepressor Like 2	Protein Coding	Q08999	52	GC16P053433	21.6694	https://www.genecards.org/cgi-bin/carddisp.pl?gene=RBL2
TWIST1	Twist Family BHLH Transcription Factor 1	Protein Coding	Q15672	52	GC07M019020	21.6534	https://www.genecards.org/cgi-bin/carddisp.pl?gene=TWIST1
HBA2	Hemoglobin Subunit Alpha 2	Protein Coding	P69905	48	GC16P021339	21.649	https://www.genecards.org/cgi-bin/carddisp.pl?gene=HBA2
SERPINB3	Serpin Family B Member 3	Protein Coding	P29508	47	GC18M063655	21.6454	https://www.genecards.org/cgi-bin/carddisp.pl?gene=SERPINB3
PRNP	Prion Protein	Protein Coding	F7VJQ1	55	GC20P004686	21.6282	https://www.genecards.org/cgi-bin/carddisp.pl?gene=PRNP
MGA	MAX Dimerization Protein MGA	Protein Coding	Q8IWI9	44	GC15P041621	21.6265	https://www.genecards.org/cgi-bin/carddisp.pl?gene=MGA
VTN	Vitronectin	Protein Coding	P04004	50	GC17M059911	21.626	https://www.genecards.org/cgi-bin/carddisp.pl?gene=VTN
NSD1	Nuclear Receptor Binding SET Domain Protein 1	Protein Coding	Q96L73	51	GC05P179183	21.6235	https://www.genecards.org/cgi-bin/carddisp.pl?gene=NSD1
PLEC	Plectin	Protein Coding	Q15149	50	GC08M146041	21.6012	https://www.genecards.org/cgi-bin/carddisp.pl?gene=PLEC
TNFRSF25	TNF Receptor Superfamily Member 25	Protein Coding	Q93038	49	GC01M006460	21.5948	https://www.genecards.org/cgi-bin/carddisp.pl?gene=TNFRSF25
HIRA	Histone Cell Cycle Regulator	Protein Coding	P54198	49	GC22M019330	21.5934	https://www.genecards.org/cgi-bin/carddisp.pl?gene=HIRA
ALOX5	Arachidonate 5-Lipoxygenase	Protein Coding	P09917	54	GC10P045374	21.5864	https://www.genecards.org/cgi-bin/carddisp.pl?gene=ALOX5
GHRL	Ghrelin And Obestatin Prepropeptide	Protein Coding	Q9UBU3	48	GC03M010285	21.5838	https://www.genecards.org/cgi-bin/carddisp.pl?gene=GHRL
PPP2CA	Protein Phosphatase 2 Catalytic Subunit Alpha	Protein Coding	P67775	56	GC05M134194	21.5781	https://www.genecards.org/cgi-bin/carddisp.pl?gene=PPP2CA
ADRB2	Adrenoceptor Beta 2	Protein Coding	P07550	55	GC05P148825	21.5655	https://www.genecards.org/cgi-bin/carddisp.pl?gene=ADRB2
IFIH1	Interferon Induced With Helicase C Domain 1	Protein Coding	Q9BYX4	54	GC02M162267	21.564	https://www.genecards.org/cgi-bin/carddisp.pl?gene=IFIH1
ARHGEF1	Rho Guanine Nucleotide Exchange Factor 1	Protein Coding	Q92888	53	GC19P041883	21.5286	https://www.genecards.org/cgi-bin/carddisp.pl?gene=ARHGEF1
SIRPB1	Signal Regulatory Protein Beta 1	Protein Coding	O00241	44	GC20M001616	21.5139	https://www.genecards.org/cgi-bin/carddisp.pl?gene=SIRPB1
HBG2	Hemoglobin Subunit Gamma 2	Protein Coding	P69892	48	GC11M008315	21.5071	https://www.genecards.org/cgi-bin/carddisp.pl?gene=HBG2
TGM2	Transglutaminase 2	Protein Coding	P21980	54	GC20M038127	21.4927	https://www.genecards.org/cgi-bin/carddisp.pl?gene=TGM2
MCM2	Minichromosome Maintenance Complex Component 2	Protein Coding	P49736	54	GC03P127598	21.4847	https://www.genecards.org/cgi-bin/carddisp.pl?gene=MCM2
STING1	Stimulator Of Interferon Response CGAMP Interactor 1	Protein Coding	Q86WV6	48	GC05M139483	21.4833	https://www.genecards.org/cgi-bin/carddisp.pl?gene=STING1
KNG1	Kininogen 1	Protein Coding	P01042	54	GC03P186717	21.4825	https://www.genecards.org/cgi-bin/carddisp.pl?gene=KNG1
ICAM3	Intercellular Adhesion Molecule 3	Protein Coding	P32942	50	GC19M010438	21.4822	https://www.genecards.org/cgi-bin/carddisp.pl?gene=ICAM3
TRBV2	T Cell Receptor Beta Variable 2	Protein Coding	A0A1B0GX68	17	GC07P152117	21.4786	https://www.genecards.org/cgi-bin/carddisp.pl?gene=TRBV2
SETX	Senataxin	Protein Coding	Q7Z333	49	GC09M132261	21.4727	https://www.genecards.org/cgi-bin/carddisp.pl?gene=SETX
PPP1R12A	Protein Phosphatase 1 Regulatory Subunit 12A	Protein Coding	O14974	51	GC12M079773	21.4673	https://www.genecards.org/cgi-bin/carddisp.pl?gene=PPP1R12A
GALC	Galactosylceramidase	Protein Coding	P54803	52	GC14M087837	21.4664	https://www.genecards.org/cgi-bin/carddisp.pl?gene=GALC
OLIG2	Oligodendrocyte Transcription Factor 2	Protein Coding	Q13516	46	GC21P033025	21.465	https://www.genecards.org/cgi-bin/carddisp.pl?gene=OLIG2
F2	Coagulation Factor II, Thrombin	Protein Coding	P00734	57	GC11P046851	21.457	https://www.genecards.org/cgi-bin/carddisp.pl?gene=F2
CALM2	Calmodulin 2	Protein Coding	P0DP24	52	GC02M047160	21.451	https://www.genecards.org/cgi-bin/carddisp.pl?gene=CALM2
LHCGR	Luteinizing Hormone/Choriogonadotropin Receptor	Protein Coding	P22888	53	GC02M048686	21.4385	https://www.genecards.org/cgi-bin/carddisp.pl?gene=LHCGR
SLC49A4	Solute Carrier Family 49 Member 4	Protein Coding	Q96SL1	42	GC03P122849	21.4339	https://www.genecards.org/cgi-bin/carddisp.pl?gene=SLC49A4
ATP2A2	ATPase Sarcoplasmic/Endoplasmic Reticulum Ca2+ Transporting 2	Protein Coding	P16615	58	GC12P110280	21.424	https://www.genecards.org/cgi-bin/carddisp.pl?gene=ATP2A2
LZTR1	Leucine Zipper Like Post Translational Regulator 1	Protein Coding	Q8N653	50	GC22P051848	21.422	https://www.genecards.org/cgi-bin/carddisp.pl?gene=LZTR1
PGF	Placental Growth Factor	Protein Coding	P49763	51	GC14M074941	21.4122	https://www.genecards.org/cgi-bin/carddisp.pl?gene=PGF
WEE1	WEE1 G2 Checkpoint Kinase	Protein Coding	P30291	55	GC11P009573	21.4109	https://www.genecards.org/cgi-bin/carddisp.pl?gene=WEE1
CYP17A1	Cytochrome P450 Family 17 Subfamily A Member 1	Protein Coding	P05093	56	GC10M102830	21.4085	https://www.genecards.org/cgi-bin/carddisp.pl?gene=CYP17A1
CTAGE1	Cutaneous T Cell Lymphoma-Associated Antigen 1	Protein Coding	Q9HC47	40	GC18M022413	21.4045	https://www.genecards.org/cgi-bin/carddisp.pl?gene=CTAGE1
KLF1	KLF Transcription Factor 1	Protein Coding	Q13351	50	GC19M012884	21.3881	https://www.genecards.org/cgi-bin/carddisp.pl?gene=KLF1
DDR2	Discoidin Domain Receptor Tyrosine Kinase 2	Protein Coding	Q16832	58	GC01P162631	21.3799	https://www.genecards.org/cgi-bin/carddisp.pl?gene=DDR2
FUT7	Fucosyltransferase 7	Protein Coding	Q11130	49	GC09M137030	21.3618	https://www.genecards.org/cgi-bin/carddisp.pl?gene=FUT7
SKAP1	Src Kinase Associated Phosphoprotein 1	Protein Coding	Q86WV1	46	GC17M048133	21.3552	https://www.genecards.org/cgi-bin/carddisp.pl?gene=SKAP1
TNFRSF11B	TNF Receptor Superfamily Member 11b	Protein Coding	O00300	54	GC08M118923	21.3334	https://www.genecards.org/cgi-bin/carddisp.pl?gene=TNFRSF11B
ZNF683	Zinc Finger Protein 683	Protein Coding	Q8IZ20	38	GC01M029314	21.3142	https://www.genecards.org/cgi-bin/carddisp.pl?gene=ZNF683
CTCF	CCCTC-Binding Factor	Protein Coding	P49711	54	GC16P067563	21.3135	https://www.genecards.org/cgi-bin/carddisp.pl?gene=CTCF
PRKCI	Protein Kinase C Iota	Protein Coding	P41743	54	GC03P170222	21.3132	https://www.genecards.org/cgi-bin/carddisp.pl?gene=PRKCI
KIR2DL3	Killer Cell Immunoglobulin Like Receptor, Two Ig Domains And Long Cytoplasmic Tail 3	Protein Coding	P43628	43	GC19P084794	21.3114	https://www.genecards.org/cgi-bin/carddisp.pl?gene=KIR2DL3
ARNT	Aryl Hydrocarbon Receptor Nuclear Translocator	Protein Coding	P27540	52	GC01M150809	21.3014	https://www.genecards.org/cgi-bin/carddisp.pl?gene=ARNT
HEPACAM	Hepatic And Glial Cell Adhesion Molecule	Protein Coding	Q14CZ8	47	GC11M124919	21.2962	https://www.genecards.org/cgi-bin/carddisp.pl?gene=HEPACAM
TIMP3	TIMP Metallopeptidase Inhibitor 3	Protein Coding	P35625	50	GC22P052286	21.2921	https://www.genecards.org/cgi-bin/carddisp.pl?gene=TIMP3
PTPN3	Protein Tyrosine Phosphatase Non-Receptor Type 3	Protein Coding	P26045	50	GC09M109375	21.2901	https://www.genecards.org/cgi-bin/carddisp.pl?gene=PTPN3
DNAH8	Dynein Axonemal Heavy Chain 8	Protein Coding	Q96JB1	45	GC06P104260	21.2843	https://www.genecards.org/cgi-bin/carddisp.pl?gene=DNAH8
POU2F1	POU Class 2 Homeobox 1	Protein Coding	P14859	50	GC01P167221	21.2797	https://www.genecards.org/cgi-bin/carddisp.pl?gene=POU2F1
MADCAM1	Mucosal Vascular Addressin Cell Adhesion Molecule 1	Protein Coding	Q13477	47	GC19P005539	21.2757	https://www.genecards.org/cgi-bin/carddisp.pl?gene=MADCAM1
KCNJ5	Potassium Inwardly Rectifying Channel Subfamily J Member 5	Protein Coding	P48544	54	GC11P128891	21.2578	https://www.genecards.org/cgi-bin/carddisp.pl?gene=KCNJ5
SATB1	SATB Homeobox 1	Protein Coding	Q01826	51	GC03M023463	21.2561	https://www.genecards.org/cgi-bin/carddisp.pl?gene=SATB1
MCM7	Minichromosome Maintenance Complex Component 7	Protein Coding	P33993	53	GC07M100092	21.2524	https://www.genecards.org/cgi-bin/carddisp.pl?gene=MCM7
NEU1	Neuraminidase 1	Protein Coding	Q99519	53	GC06M031857	21.2373	https://www.genecards.org/cgi-bin/carddisp.pl?gene=NEU1
PRTN3	Proteinase 3	Protein Coding	P24158	52	GC19P000840	21.237	https://www.genecards.org/cgi-bin/carddisp.pl?gene=PRTN3
SPARC	Secreted Protein Acidic And Cysteine Rich	Protein Coding	P09486	56	GC05M151661	21.2091	https://www.genecards.org/cgi-bin/carddisp.pl?gene=SPARC
ICAM2	Intercellular Adhesion Molecule 2	Protein Coding	P13598	50	GC17M064002	21.2057	https://www.genecards.org/cgi-bin/carddisp.pl?gene=ICAM2
NAMPT	Nicotinamide Phosphoribosyltransferase	Protein Coding	P43490	54	GC07M106248	21.2028	https://www.genecards.org/cgi-bin/carddisp.pl?gene=NAMPT
APAF1	Apoptotic Peptidase Activating Factor 1	Protein Coding	O14727	54	GC12P098645	21.1757	https://www.genecards.org/cgi-bin/carddisp.pl?gene=APAF1
RHO	Rhodopsin	Protein Coding	P08100	54	GC03P136173	21.1732	https://www.genecards.org/cgi-bin/carddisp.pl?gene=RHO
KAT6A	Lysine Acetyltransferase 6A	Protein Coding	Q92794	53	GC08M041929	21.1614	https://www.genecards.org/cgi-bin/carddisp.pl?gene=KAT6A
ZNF521	Zinc Finger Protein 521	Protein Coding	Q96K83	45	GC18M025061	21.1518	https://www.genecards.org/cgi-bin/carddisp.pl?gene=ZNF521
AKAP13	A-Kinase Anchoring Protein 13	Protein Coding	Q12802	49	GC15P133143	21.1472	https://www.genecards.org/cgi-bin/carddisp.pl?gene=AKAP13
RPL26	Ribosomal Protein L26	Protein Coding	P61254	50	GC17M008377	21.1464	https://www.genecards.org/cgi-bin/carddisp.pl?gene=RPL26
SYP	Synaptophysin	Protein Coding	P08247	53	GC0XM049187	21.1351	https://www.genecards.org/cgi-bin/carddisp.pl?gene=SYP
ITGA3	Integrin Subunit Alpha 3	Protein Coding	P26006	55	GC17P050055	21.118	https://www.genecards.org/cgi-bin/carddisp.pl?gene=ITGA3
MC1R	Melanocortin 1 Receptor	Protein Coding	Q01726	54	GC16P089912	21.1118	https://www.genecards.org/cgi-bin/carddisp.pl?gene=MC1R
MAP2K4	Mitogen-Activated Protein Kinase Kinase 4	Protein Coding	P45985	54	GC17P012020	21.1007	https://www.genecards.org/cgi-bin/carddisp.pl?gene=MAP2K4
UBE2I	Ubiquitin Conjugating Enzyme E2 I	Protein Coding	P63279	54	GC16P021384	21.0974	https://www.genecards.org/cgi-bin/carddisp.pl?gene=UBE2I
WNT1	Wnt Family Member 1	Protein Coding	P04628	54	GC12P050404	21.0926	https://www.genecards.org/cgi-bin/carddisp.pl?gene=WNT1
AREG	Amphiregulin	Protein Coding	P15514	50	GC04P074445	21.0839	https://www.genecards.org/cgi-bin/carddisp.pl?gene=AREG
TCAIM	T Cell Activation Inhibitor, Mitochondrial	Protein Coding	Q8N3R3	34	GC03P044339	21.0803	https://www.genecards.org/cgi-bin/carddisp.pl?gene=TCAIM
MMP7	Matrix Metallopeptidase 7	Protein Coding	P09237	54	GC11M109974	21.0785	https://www.genecards.org/cgi-bin/carddisp.pl?gene=MMP7
MAP2K7	Mitogen-Activated Protein Kinase Kinase 7	Protein Coding	O14733	52	GC19P007903	21.0698	https://www.genecards.org/cgi-bin/carddisp.pl?gene=MAP2K7
PIK3R5	Phosphoinositide-3-Kinase Regulatory Subunit 5	Protein Coding	Q8WYR1	51	GC17M008878	21.0678	https://www.genecards.org/cgi-bin/carddisp.pl?gene=PIK3R5
BECN1	Beclin 1	Protein Coding	Q14457	53	GC17M042810	21.0595	https://www.genecards.org/cgi-bin/carddisp.pl?gene=BECN1
GH1	Growth Hormone 1	Protein Coding	P01241	50	GC17M063917	21.0527	https://www.genecards.org/cgi-bin/carddisp.pl?gene=GH1
LILRB2	Leukocyte Immunoglobulin Like Receptor B2	Protein Coding	Q8N423	47	GC19M080118	21.0504	https://www.genecards.org/cgi-bin/carddisp.pl?gene=LILRB2
HPS6	HPS6 Biogenesis Of Lysosomal Organelles Complex 2 Subunit 3	Protein Coding	Q86YV9	46	GC10P102065	21.0434	https://www.genecards.org/cgi-bin/carddisp.pl?gene=HPS6
MVP	Major Vault Protein	Protein Coding	Q14764	47	GC16P047695	21.0357	https://www.genecards.org/cgi-bin/carddisp.pl?gene=MVP
C3	Complement C3	Protein Coding	P01024	56	GC19M006677	21.0301	https://www.genecards.org/cgi-bin/carddisp.pl?gene=C3
ELL2	Elongation Factor For RNA Polymerase II 2	Protein Coding	O00472	45	GC05M095885	21.0221	https://www.genecards.org/cgi-bin/carddisp.pl?gene=ELL2
TNC	Tenascin C	Protein Coding	P24821	56	GC09M115019	21.0173	https://www.genecards.org/cgi-bin/carddisp.pl?gene=TNC
CDC73	Cell Division Cycle 73	Protein Coding	Q6P1J9	53	GC01P193121	21.0121	https://www.genecards.org/cgi-bin/carddisp.pl?gene=CDC73
PRKD2	Protein Kinase D2	Protein Coding	Q9BZL6	53	GC19M046674	20.9958	https://www.genecards.org/cgi-bin/carddisp.pl?gene=PRKD2
KLK3	Kallikrein Related Peptidase 3	Protein Coding	P07288	53	GC19P050854	20.9923	https://www.genecards.org/cgi-bin/carddisp.pl?gene=KLK3
FGFR4	Fibroblast Growth Factor Receptor 4	Protein Coding	P22455	58	GC05P177086	20.9891	https://www.genecards.org/cgi-bin/carddisp.pl?gene=FGFR4
TNFRSF14	TNF Receptor Superfamily Member 14	Protein Coding	Q92956	49	GC01P005320	20.974	https://www.genecards.org/cgi-bin/carddisp.pl?gene=TNFRSF14
IL23R	Interleukin 23 Receptor	Protein Coding	Q5VWK5	52	GC01P067138	20.9719	https://www.genecards.org/cgi-bin/carddisp.pl?gene=IL23R
GPI	Glucose-6-Phosphate Isomerase	Protein Coding	P06744	54	GC19P034359	20.9502	https://www.genecards.org/cgi-bin/carddisp.pl?gene=GPI
RPS26	Ribosomal Protein S26	Protein Coding	P62854	49	GC12P058055	20.9444	https://www.genecards.org/cgi-bin/carddisp.pl?gene=RPS26
PKP2	Plakophilin 2	Protein Coding	Q99959	51	GC12M032790	20.9412	https://www.genecards.org/cgi-bin/carddisp.pl?gene=PKP2
CSNK2B	Casein Kinase 2 Beta	Protein Coding	P67870	55	GC06P104101	20.9266	https://www.genecards.org/cgi-bin/carddisp.pl?gene=CSNK2B
SEMA4A	Semaphorin 4A	Protein Coding	Q9H3S1	52	GC01P156147	20.9141	https://www.genecards.org/cgi-bin/carddisp.pl?gene=SEMA4A
EPG5	Ectopic P-Granules 5 Autophagy Tethering Factor	Protein Coding	Q9HCE0	45	GC18M045800	20.8986	https://www.genecards.org/cgi-bin/carddisp.pl?gene=EPG5
PTPN13	Protein Tyrosine Phosphatase Non-Receptor Type 13	Protein Coding	Q12923	50	GC04P086594	20.8901	https://www.genecards.org/cgi-bin/carddisp.pl?gene=PTPN13
ANGPT1	Angiopoietin 1	Protein Coding	Q15389	53	GC08M107246	20.885	https://www.genecards.org/cgi-bin/carddisp.pl?gene=ANGPT1
RBBP8	RB Binding Protein 8, Endonuclease	Protein Coding	Q99708	51	GC18P022798	20.8823	https://www.genecards.org/cgi-bin/carddisp.pl?gene=RBBP8
HDAC3	Histone Deacetylase 3	Protein Coding	O15379	56	GC05M141620	20.882	https://www.genecards.org/cgi-bin/carddisp.pl?gene=HDAC3
GAD2	Glutamate Decarboxylase 2	Protein Coding	Q05329	50	GC10P026216	20.8802	https://www.genecards.org/cgi-bin/carddisp.pl?gene=GAD2
CD163	CD163 Molecule	Protein Coding	Q86VB7	51	GC12M008547	20.877	https://www.genecards.org/cgi-bin/carddisp.pl?gene=CD163
ITFG1	Integrin Alpha FG-GAP Repeat Containing 1	Protein Coding	Q8TB96	44	GC16M047158	20.8744	https://www.genecards.org/cgi-bin/carddisp.pl?gene=ITFG1
PDPN	Podoplanin	Protein Coding	Q86YL7	48	GC01P013583	20.8638	https://www.genecards.org/cgi-bin/carddisp.pl?gene=PDPN
CD24	CD24 Molecule	Protein Coding	P25063	41	GC06M106969	20.8559	https://www.genecards.org/cgi-bin/carddisp.pl?gene=CD24
WNT3A	Wnt Family Member 3A	Protein Coding	P56704	54	GC01P230033	20.8552	https://www.genecards.org/cgi-bin/carddisp.pl?gene=WNT3A
RBPJ	Recombination Signal Binding Protein For Immunoglobulin Kappa J Region	Protein Coding	Q06330	54	GC04P026105	20.8499	https://www.genecards.org/cgi-bin/carddisp.pl?gene=RBPJ
SMN1	Survival Of Motor Neuron 1, Telomeric	Protein Coding	Q16637	47	GC05P070924	20.8485	https://www.genecards.org/cgi-bin/carddisp.pl?gene=SMN1
ALPP	Alkaline Phosphatase, Placental	Protein Coding	P05187	50	GC02P232378	20.8324	https://www.genecards.org/cgi-bin/carddisp.pl?gene=ALPP
SMARCE1	SWI/SNF Related, Matrix Associated, Actin Dependent Regulator Of Chromatin, Subfamily E, Member 1	Protein Coding	Q969G3	52	GC17M040624	20.8233	https://www.genecards.org/cgi-bin/carddisp.pl?gene=SMARCE1
POLR2A	RNA Polymerase II Subunit A	Protein Coding	P24928	52	GC17P013016	20.8052	https://www.genecards.org/cgi-bin/carddisp.pl?gene=POLR2A
TRAF1	TNF Receptor Associated Factor 1	Protein Coding	Q13077	48	GC09M120902	20.7977	https://www.genecards.org/cgi-bin/carddisp.pl?gene=TRAF1
CCL18	C-C Motif Chemokine Ligand 18	Protein Coding	P55774	42	GC17P036064	20.7906	https://www.genecards.org/cgi-bin/carddisp.pl?gene=CCL18
MAG	Myelin Associated Glycoprotein	Protein Coding	P20916	54	GC19P035292	20.7882	https://www.genecards.org/cgi-bin/carddisp.pl?gene=MAG
ACTC1	Actin Alpha Cardiac Muscle 1	Protein Coding	P68032	51	GC15M034790	20.7874	https://www.genecards.org/cgi-bin/carddisp.pl?gene=ACTC1
RPS10	Ribosomal Protein S10	Protein Coding	P46783	50	GC06M081046	20.7712	https://www.genecards.org/cgi-bin/carddisp.pl?gene=RPS10
FCRL3	Fc Receptor Like 3	Protein Coding	Q96P31	44	GC01M157674	20.7666	https://www.genecards.org/cgi-bin/carddisp.pl?gene=FCRL3
PPP6R3	Protein Phosphatase 6 Regulatory Subunit 3	Protein Coding	Q5H9R7	44	GC11P068460	20.7562	https://www.genecards.org/cgi-bin/carddisp.pl?gene=PPP6R3
BTNL2	Butyrophilin Like 2	Protein Coding	Q9UIR0	45	GC06M032393	20.7544	https://www.genecards.org/cgi-bin/carddisp.pl?gene=BTNL2
GAB2	GRB2 Associated Binding Protein 2	Protein Coding	Q9UQC2	49	GC11M078215	20.7525	https://www.genecards.org/cgi-bin/carddisp.pl?gene=GAB2
BTG1	BTG Anti-Proliferation Factor 1	Protein Coding	P62324	46	GC12M092140	20.7421	https://www.genecards.org/cgi-bin/carddisp.pl?gene=BTG1
TRBV18	T Cell Receptor Beta Variable 18	Protein Coding	A0A087X0M5	11	GC07P153258	20.7396	https://www.genecards.org/cgi-bin/carddisp.pl?gene=TRBV18
STK10	Serine/Threonine Kinase 10	Protein Coding	O94804	49	GC05M172042	20.7394	https://www.genecards.org/cgi-bin/carddisp.pl?gene=STK10
FPGS	Folylpolyglutamate Synthase	Protein Coding	Q05932	48	GC09P127794	20.7313	https://www.genecards.org/cgi-bin/carddisp.pl?gene=FPGS
SEC23B	SEC23 Homolog B, COPII Coat Complex Component	Protein Coding	Q15437	49	GC20P018507	20.7254	https://www.genecards.org/cgi-bin/carddisp.pl?gene=SEC23B
PTCH2	Patched 2	Protein Coding	Q9Y6C5	52	GC01M044819	20.7224	https://www.genecards.org/cgi-bin/carddisp.pl?gene=PTCH2
LDHA	Lactate Dehydrogenase A	Protein Coding	P00338	57	GC11P018394	20.7152	https://www.genecards.org/cgi-bin/carddisp.pl?gene=LDHA
OTULIN	OTU Deubiquitinase With Linear Linkage Specificity	Protein Coding	Q96BN8	48	GC05P014667	20.7122	https://www.genecards.org/cgi-bin/carddisp.pl?gene=OTULIN
PIK3R4	Phosphoinositide-3-Kinase Regulatory Subunit 4	Protein Coding	Q99570	52	GC03M130678	20.7108	https://www.genecards.org/cgi-bin/carddisp.pl?gene=PIK3R4
CYP2D6	Cytochrome P450 Family 2 Subfamily D Member 6	Protein Coding	P10635	52	GC22M042126	20.7022	https://www.genecards.org/cgi-bin/carddisp.pl?gene=CYP2D6
TP53BP1	Tumor Protein P53 Binding Protein 1	Protein Coding	Q12888	50	GC15M043403	20.6949	https://www.genecards.org/cgi-bin/carddisp.pl?gene=TP53BP1
IL17RA	Interleukin 17 Receptor A	Protein Coding	Q96F46	53	GC22P051683	20.6896	https://www.genecards.org/cgi-bin/carddisp.pl?gene=IL17RA
DSPP	Dentin Sialophosphoprotein	Protein Coding	Q9NZW4	46	GC04P087608	20.6874	https://www.genecards.org/cgi-bin/carddisp.pl?gene=DSPP
CTSK	Cathepsin K	Protein Coding	P43235	57	GC01M155887	20.6853	https://www.genecards.org/cgi-bin/carddisp.pl?gene=CTSK
PDGFA	Platelet Derived Growth Factor Subunit A	Protein Coding	P04085	50	GC07M000497	20.67	https://www.genecards.org/cgi-bin/carddisp.pl?gene=PDGFA
CAMK4	Calcium/Calmodulin Dependent Protein Kinase IV	Protein Coding	Q16566	53	GC05P111223	20.6658	https://www.genecards.org/cgi-bin/carddisp.pl?gene=CAMK4
RANBP2	RAN Binding Protein 2	Protein Coding	P49792	53	GC02P108719	20.6613	https://www.genecards.org/cgi-bin/carddisp.pl?gene=RANBP2
LAMTOR2	Late Endosomal/Lysosomal Adaptor, MAPK And MTOR Activator 2	Protein Coding	Q9Y2Q5	49	GC01P156054	20.6607	https://www.genecards.org/cgi-bin/carddisp.pl?gene=LAMTOR2
CA9	Carbonic Anhydrase 9	Protein Coding	Q16790	53	GC09P035673	20.6558	https://www.genecards.org/cgi-bin/carddisp.pl?gene=CA9
PAX3	Paired Box 3	Protein Coding	P23760	53	GC02M222199	20.6535	https://www.genecards.org/cgi-bin/carddisp.pl?gene=PAX3
PIK3C2A	Phosphatidylinositol-4-Phosphate 3-Kinase Catalytic Subunit Type 2 Alpha	Protein Coding	O00443	54	GC11M017772	20.6524	https://www.genecards.org/cgi-bin/carddisp.pl?gene=PIK3C2A
PIM1	Pim-1 Proto-Oncogene, Serine/Threonine Kinase	Protein Coding	P11309	56	GC06P104249	20.6471	https://www.genecards.org/cgi-bin/carddisp.pl?gene=PIM1
GCM1	Glial Cells Missing Transcription Factor 1	Protein Coding	Q9NP62	45	GC06M081300	20.6444	https://www.genecards.org/cgi-bin/carddisp.pl?gene=GCM1
KAT2B	Lysine Acetyltransferase 2B	Protein Coding	Q92831	54	GC03P020044	20.6356	https://www.genecards.org/cgi-bin/carddisp.pl?gene=KAT2B
TPP2	Tripeptidyl Peptidase 2	Protein Coding	P29144	50	GC13P102596	20.6174	https://www.genecards.org/cgi-bin/carddisp.pl?gene=TPP2
CDK7	Cyclin Dependent Kinase 7	Protein Coding	P50613	52	GC05P069484	20.6073	https://www.genecards.org/cgi-bin/carddisp.pl?gene=CDK7
IGHG1	Immunoglobulin Heavy Constant Gamma 1 (G1m Marker)	Protein Coding	P01857	40	GC14M105736	20.6051	https://www.genecards.org/cgi-bin/carddisp.pl?gene=IGHG1
DLL1	Delta Like Canonical Notch Ligand 1	Protein Coding	O00548	52	GC06M170282	20.6012	https://www.genecards.org/cgi-bin/carddisp.pl?gene=DLL1
RAD51C	RAD51 Paralog C	Protein Coding	O43502	50	GC17P058692	20.5991	https://www.genecards.org/cgi-bin/carddisp.pl?gene=RAD51C
ARHGEF2	Rho/Rac Guanine Nucleotide Exchange Factor 2	Protein Coding	Q92974	53	GC01M155946	20.5956	https://www.genecards.org/cgi-bin/carddisp.pl?gene=ARHGEF2
PAK4	P21 (RAC1) Activated Kinase 4	Protein Coding	O96013	56	GC19P039125	20.5906	https://www.genecards.org/cgi-bin/carddisp.pl?gene=PAK4
SNAI1	Snail Family Transcriptional Repressor 1	Protein Coding	O95863	50	GC20P049982	20.5723	https://www.genecards.org/cgi-bin/carddisp.pl?gene=SNAI1
CTAG1B	Cancer/Testis Antigen 1B	Protein Coding	P78358	36	GC0XM154617	20.5719	https://www.genecards.org/cgi-bin/carddisp.pl?gene=CTAG1B
SMC1A	Structural Maintenance Of Chromosomes 1A	Protein Coding	Q14683	54	GC0XM053374	20.5707	https://www.genecards.org/cgi-bin/carddisp.pl?gene=SMC1A
PPIA	Peptidylprolyl Isomerase A	Protein Coding	P62937	52	GC07P044811	20.5693	https://www.genecards.org/cgi-bin/carddisp.pl?gene=PPIA
HLA-DMB	Major Histocompatibility Complex, Class II, DM Beta	Protein Coding	P28068	46	GC06M032934	20.5666	https://www.genecards.org/cgi-bin/carddisp.pl?gene=HLA-DMB
SART3	Spliceosome Associated Factor 3, U4/U6 Recycling Protein	Protein Coding	Q15020	43	GC12M108522	20.5641	https://www.genecards.org/cgi-bin/carddisp.pl?gene=SART3
DGCR8	DGCR8 Microprocessor Complex Subunit	Protein Coding	Q8WYQ5	49	GC22P020080	20.558	https://www.genecards.org/cgi-bin/carddisp.pl?gene=DGCR8
TOP2B	DNA Topoisomerase II Beta	Protein Coding	Q02880	52	GC03M025598	20.5517	https://www.genecards.org/cgi-bin/carddisp.pl?gene=TOP2B
HBG1	Hemoglobin Subunit Gamma 1	Protein Coding	P69891	46	GC11M008314	20.5426	https://www.genecards.org/cgi-bin/carddisp.pl?gene=HBG1
TGIF1	TGFB Induced Factor Homeobox 1	Protein Coding	Q15583	53	GC18P003411	20.5406	https://www.genecards.org/cgi-bin/carddisp.pl?gene=TGIF1
LILRB4	Leukocyte Immunoglobulin Like Receptor B4	Protein Coding	Q8NHJ6	44	GC19P054643	20.5346	https://www.genecards.org/cgi-bin/carddisp.pl?gene=LILRB4
RNF31	Ring Finger Protein 31	Protein Coding	Q96EP0	48	GC14P024146	20.53	https://www.genecards.org/cgi-bin/carddisp.pl?gene=RNF31
CTNNA3	Catenin Alpha 3	Protein Coding	Q9UI47	48	GC10M065912	20.529	https://www.genecards.org/cgi-bin/carddisp.pl?gene=CTNNA3
TUBB3	Tubulin Beta 3 Class III	Protein Coding	Q13509	56	GC16P092043	20.5207	https://www.genecards.org/cgi-bin/carddisp.pl?gene=TUBB3
GCM2	Glial Cells Missing Transcription Factor 2	Protein Coding	O75603	48	GC06M010873	20.51	https://www.genecards.org/cgi-bin/carddisp.pl?gene=GCM2
KDM5C	Lysine Demethylase 5C	Protein Coding	P41229	53	GC0XM053176	20.5063	https://www.genecards.org/cgi-bin/carddisp.pl?gene=KDM5C
FASN	Fatty Acid Synthase	Protein Coding	P49327	56	GC17M082078	20.5054	https://www.genecards.org/cgi-bin/carddisp.pl?gene=FASN
IRS2	Insulin Receptor Substrate 2	Protein Coding	Q9Y4H2	51	GC13M109752	20.5053	https://www.genecards.org/cgi-bin/carddisp.pl?gene=IRS2
RPS20	Ribosomal Protein S20	Protein Coding	P60866	50	GC08M056067	20.5	https://www.genecards.org/cgi-bin/carddisp.pl?gene=RPS20
ADCY10	Adenylate Cyclase 10	Protein Coding	Q96PN6	50	GC01M167809	20.4993	https://www.genecards.org/cgi-bin/carddisp.pl?gene=ADCY10
TSG101	Tumor Susceptibility 101	Protein Coding	Q99816	50	GC11M018468	20.4849	https://www.genecards.org/cgi-bin/carddisp.pl?gene=TSG101
MEIS1	Meis Homeobox 1	Protein Coding	O00470	48	GC02P066433	20.4817	https://www.genecards.org/cgi-bin/carddisp.pl?gene=MEIS1
PAG1	Phosphoprotein Membrane Anchor With Glycosphingolipid Microdomains 1	Protein Coding	Q9NWQ8	45	GC08M080967	20.4737	https://www.genecards.org/cgi-bin/carddisp.pl?gene=PAG1
CLEC12A	C-Type Lectin Domain Family 12 Member A	Protein Coding	Q5QGZ9	46	GC12P009951	20.4514	https://www.genecards.org/cgi-bin/carddisp.pl?gene=CLEC12A
THEMIS	Thymocyte Selection Associated	Protein Coding	Q8N1K5	46	GC06M127708	20.4499	https://www.genecards.org/cgi-bin/carddisp.pl?gene=THEMIS
HOXA9	Homeobox A9	Protein Coding	P31269	45	GC07M027162	20.438	https://www.genecards.org/cgi-bin/carddisp.pl?gene=HOXA9
UBXN11	UBX Domain Protein 11	Protein Coding	Q5T124	44	GC01M026281	20.437	https://www.genecards.org/cgi-bin/carddisp.pl?gene=UBXN11
UBASH3A	Ubiquitin Associated And SH3 Domain Containing A	Protein Coding	P57075	46	GC21P042403	20.4341	https://www.genecards.org/cgi-bin/carddisp.pl?gene=UBASH3A
IL19	Interleukin 19	Protein Coding	Q9UHD0	46	GC01P206770	20.4249	https://www.genecards.org/cgi-bin/carddisp.pl?gene=IL19
RIOX2	Ribosomal Oxygenase 2	Protein Coding	Q8IUF8	43	GC03M097942	20.4125	https://www.genecards.org/cgi-bin/carddisp.pl?gene=RIOX2
PLS3	Plastin 3	Protein Coding	P13797	48	GC0XP115560	20.4081	https://www.genecards.org/cgi-bin/carddisp.pl?gene=PLS3
MUC6	Mucin 6, Oligomeric Mucus/Gel-Forming	Protein Coding	Q6W4X9	46	GC11M001012	20.3979	https://www.genecards.org/cgi-bin/carddisp.pl?gene=MUC6
FANCI	FA Complementation Group I	Protein Coding	Q9NVI1	49	GC15P089243	20.3927	https://www.genecards.org/cgi-bin/carddisp.pl?gene=FANCI
FIP1L1	Factor Interacting With PAPOLA And CPSF1	Protein Coding	Q6UN15	46	GC04P053447	20.3925	https://www.genecards.org/cgi-bin/carddisp.pl?gene=FIP1L1
RRAS2	RAS Related 2	Protein Coding	P62070	54	GC11M014299	20.3895	https://www.genecards.org/cgi-bin/carddisp.pl?gene=RRAS2
DNM2	Dynamin 2	Protein Coding	P50570	56	GC19P010718	20.3867	https://www.genecards.org/cgi-bin/carddisp.pl?gene=DNM2
MDM4	MDM4 Regulator Of P53	Protein Coding	O15151	53	GC01P204516	20.3797	https://www.genecards.org/cgi-bin/carddisp.pl?gene=MDM4
CASR	Calcium Sensing Receptor	Protein Coding	P41180	58	GC03P122183	20.3695	https://www.genecards.org/cgi-bin/carddisp.pl?gene=CASR
ATP6AP2	ATPase H+ Transporting Accessory Protein 2	Protein Coding	O75787	52	GC0XP040588	20.3672	https://www.genecards.org/cgi-bin/carddisp.pl?gene=ATP6AP2
POLG	DNA Polymerase Gamma, Catalytic Subunit	Protein Coding	P54098	54	GC15M133858	20.364	https://www.genecards.org/cgi-bin/carddisp.pl?gene=POLG
BMP7	Bone Morphogenetic Protein 7	Protein Coding	P18075	53	GC20M057168	20.3587	https://www.genecards.org/cgi-bin/carddisp.pl?gene=BMP7
CCL21	C-C Motif Chemokine Ligand 21	Protein Coding	O00585	48	GC09M034709	20.3545	https://www.genecards.org/cgi-bin/carddisp.pl?gene=CCL21
MAP3K5	Mitogen-Activated Protein Kinase Kinase Kinase 5	Protein Coding	Q99683	55	GC06M136557	20.35	https://www.genecards.org/cgi-bin/carddisp.pl?gene=MAP3K5
CXCR6	C-X-C Motif Chemokine Receptor 6	Protein Coding	O00574	46	GC03P051143	20.3438	https://www.genecards.org/cgi-bin/carddisp.pl?gene=CXCR6
E2F4	E2F Transcription Factor 4	Protein Coding	Q16254	51	GC16P067192	20.3437	https://www.genecards.org/cgi-bin/carddisp.pl?gene=E2F4
GSTM1	Glutathione S-Transferase Mu 1	Protein Coding	P09488	49	GC01P109687	20.3419	https://www.genecards.org/cgi-bin/carddisp.pl?gene=GSTM1
GLE1	GLE1 RNA Export Mediator	Protein Coding	Q53GS7	49	GC09P128504	20.3196	https://www.genecards.org/cgi-bin/carddisp.pl?gene=GLE1
MMP13	Matrix Metallopeptidase 13	Protein Coding	P45452	57	GC11M102942	20.3141	https://www.genecards.org/cgi-bin/carddisp.pl?gene=MMP13
SCGB1A1	Secretoglobin Family 1A Member 1	Protein Coding	P11684	48	GC11P062405	20.3093	https://www.genecards.org/cgi-bin/carddisp.pl?gene=SCGB1A1
DIABLO	Diablo IAP-Binding Mitochondrial Protein	Protein Coding	Q9NR28	53	GC12M122876	20.3033	https://www.genecards.org/cgi-bin/carddisp.pl?gene=DIABLO
NCOR1	Nuclear Receptor Corepressor 1	Protein Coding	O75376	50	GC17M016029	20.298	https://www.genecards.org/cgi-bin/carddisp.pl?gene=NCOR1
NCOA3	Nuclear Receptor Coactivator 3	Protein Coding	Q9Y6Q9	54	GC20P047501	20.2897	https://www.genecards.org/cgi-bin/carddisp.pl?gene=NCOA3
PKD1	Polycystin 1, Transient Receptor Potential Channel Interacting	Protein Coding	P98161	52	GC16M010453	20.2895	https://www.genecards.org/cgi-bin/carddisp.pl?gene=PKD1
ALPL	Alkaline Phosphatase, Biomineralization Associated	Protein Coding	P05186	58	GC01P021508	20.277	https://www.genecards.org/cgi-bin/carddisp.pl?gene=ALPL
TRIM28	Tripartite Motif Containing 28	Protein Coding	Q13263	52	GC19P058544	20.276	https://www.genecards.org/cgi-bin/carddisp.pl?gene=TRIM28
SPAAR	Small Regulatory Polypeptide Of Amino Acid Response	Protein Coding	A0A1B0GVQ0	22	GC09P052021	20.2617	https://www.genecards.org/cgi-bin/carddisp.pl?gene=SPAAR
TBP	TATA-Box Binding Protein	Protein Coding	P20226	56	GC06P170554	20.2597	https://www.genecards.org/cgi-bin/carddisp.pl?gene=TBP
NGFR	Nerve Growth Factor Receptor	Protein Coding	P08138	54	GC17P049495	20.2582	https://www.genecards.org/cgi-bin/carddisp.pl?gene=NGFR
MCTS1	MCTS1 Re-Initiation And Release Factor	Protein Coding	Q9ULC4	43	GC0XP120594	20.2558	https://www.genecards.org/cgi-bin/carddisp.pl?gene=MCTS1
PPP1R1B	Protein Phosphatase 1 Regulatory Inhibitor Subunit 1B	Protein Coding	Q9UD71	49	GC17P039626	20.2297	https://www.genecards.org/cgi-bin/carddisp.pl?gene=PPP1R1B
TNFSF12	TNF Superfamily Member 12	Protein Coding	O43508	45	GC17P013018	20.2233	https://www.genecards.org/cgi-bin/carddisp.pl?gene=TNFSF12
GNA11	G Protein Subunit Alpha 11	Protein Coding	P29992	54	GC19P003094	20.2092	https://www.genecards.org/cgi-bin/carddisp.pl?gene=GNA11
ARG1	Arginase 1	Protein Coding	P05089	56	GC06P131473	20.194	https://www.genecards.org/cgi-bin/carddisp.pl?gene=ARG1
F5	Coagulation Factor V	Protein Coding	P12259	54	GC01M169511	20.188	https://www.genecards.org/cgi-bin/carddisp.pl?gene=F5
GLI3	GLI Family Zinc Finger 3	Protein Coding	P10071	56	GC07M041960	20.1864	https://www.genecards.org/cgi-bin/carddisp.pl?gene=GLI3
GPSM2	G Protein Signaling Modulator 2	Protein Coding	P81274	48	GC01P108875	20.181	https://www.genecards.org/cgi-bin/carddisp.pl?gene=GPSM2
SOX4	SRY-Box Transcription Factor 4	Protein Coding	Q06945	50	GC06P021593	20.1803	https://www.genecards.org/cgi-bin/carddisp.pl?gene=SOX4
FOXA2	Forkhead Box A2	Protein Coding	Q9Y261	53	GC20M022581	20.1668	https://www.genecards.org/cgi-bin/carddisp.pl?gene=FOXA2
IL3RA	Interleukin 3 Receptor Subunit Alpha	Protein Coding	P26951	50	GC0XP001336	20.1655	https://www.genecards.org/cgi-bin/carddisp.pl?gene=IL3RA
DDB2	Damage Specific DNA Binding Protein 2	Protein Coding	Q92466	53	GC11P047237	20.162	https://www.genecards.org/cgi-bin/carddisp.pl?gene=DDB2
ACTA1	Actin Alpha 1, Skeletal Muscle	Protein Coding	P68133	54	GC01M229883	20.1507	https://www.genecards.org/cgi-bin/carddisp.pl?gene=ACTA1
CD63	CD63 Molecule	Protein Coding	P08962	49	GC12M055725	20.1481	https://www.genecards.org/cgi-bin/carddisp.pl?gene=CD63
PRKCG	Protein Kinase C Gamma	Protein Coding	P05129	58	GC19P053879	20.1462	https://www.genecards.org/cgi-bin/carddisp.pl?gene=PRKCG
DCK	Deoxycytidine Kinase	Protein Coding	P27707	50	GC04P070992	20.1375	https://www.genecards.org/cgi-bin/carddisp.pl?gene=DCK
CDC37	Cell Division Cycle 37, HSP90 Cochaperone	Protein Coding	Q16543	50	GC19M010391	20.136	https://www.genecards.org/cgi-bin/carddisp.pl?gene=CDC37
KLRC2	Killer Cell Lectin Like Receptor C2	Protein Coding	P26717	42	GC12M024909	20.1315	https://www.genecards.org/cgi-bin/carddisp.pl?gene=KLRC2
SLAMF7	SLAM Family Member 7	Protein Coding	Q9NQ25	49	GC01P160740	20.1303	https://www.genecards.org/cgi-bin/carddisp.pl?gene=SLAMF7
NTRK3	Neurotrophic Receptor Tyrosine Kinase 3	Protein Coding	Q16288	60	GC15M087859	20.127	https://www.genecards.org/cgi-bin/carddisp.pl?gene=NTRK3
CCT3	Chaperonin Containing TCP1 Subunit 3	Protein Coding	P49368	48	GC01M156308	20.1207	https://www.genecards.org/cgi-bin/carddisp.pl?gene=CCT3
PPP1R12C	Protein Phosphatase 1 Regulatory Subunit 12C	Protein Coding	Q9BZL4	41	GC19M080152	20.1169	https://www.genecards.org/cgi-bin/carddisp.pl?gene=PPP1R12C
PSTPIP1	Proline-Serine-Threonine Phosphatase Interacting Protein 1	Protein Coding	O43586	50	GC15P076993	20.0874	https://www.genecards.org/cgi-bin/carddisp.pl?gene=PSTPIP1
TBX22	T-Box Transcription Factor 22	Protein Coding	Q9Y458	45	GC0XP080014	20.0676	https://www.genecards.org/cgi-bin/carddisp.pl?gene=TBX22
MAP4K1	Mitogen-Activated Protein Kinase Kinase Kinase Kinase 1	Protein Coding	Q92918	50	GC19M038587	20.0655	https://www.genecards.org/cgi-bin/carddisp.pl?gene=MAP4K1
NCOA2	Nuclear Receptor Coactivator 2	Protein Coding	Q15596	52	GC08M070109	20.0621	https://www.genecards.org/cgi-bin/carddisp.pl?gene=NCOA2
MAX	MYC Associated Factor X	Protein Coding	P61244	54	GC14M065190	20.0488	https://www.genecards.org/cgi-bin/carddisp.pl?gene=MAX
VRK1	VRK Serine/Threonine Kinase 1	Protein Coding	Q99986	55	GC14P096797	20.0475	https://www.genecards.org/cgi-bin/carddisp.pl?gene=VRK1
FGF8	Fibroblast Growth Factor 8	Protein Coding	P55075	54	GC10M101770	20.0458	https://www.genecards.org/cgi-bin/carddisp.pl?gene=FGF8
RIGI	RNA Sensor RIG-I	Protein Coding	O95786	54	GC09M032480	20.0413	https://www.genecards.org/cgi-bin/carddisp.pl?gene=RIGI
HELLS	Helicase, Lymphoid Specific	Protein Coding	Q9NRZ9	52	GC10P098635	20.038	https://www.genecards.org/cgi-bin/carddisp.pl?gene=HELLS
LILRB1	Leukocyte Immunoglobulin Like Receptor B1	Protein Coding	Q8NHL6	50	GC19P083909	20.0213	https://www.genecards.org/cgi-bin/carddisp.pl?gene=LILRB1
ISL1	ISL LIM Homeobox 1	Protein Coding	P61371	51	GC05P051383	20.0107	https://www.genecards.org/cgi-bin/carddisp.pl?gene=ISL1
APOBEC3G	Apolipoprotein B MRNA Editing Enzyme Catalytic Subunit 3G	Protein Coding	Q9HC16	48	GC22P052465	19.9965	https://www.genecards.org/cgi-bin/carddisp.pl?gene=APOBEC3G
OPTN	Optineurin	Protein Coding	Q96CV9	50	GC10P013099	19.9872	https://www.genecards.org/cgi-bin/carddisp.pl?gene=OPTN
LPP	LIM Domain Containing Preferred Translocation Partner In Lipoma	Protein Coding	Q93052	51	GC03P188153	19.9857	https://www.genecards.org/cgi-bin/carddisp.pl?gene=LPP
PDE4A	Phosphodiesterase 4A	Protein Coding	P27815	51	GC19P010416	19.982	https://www.genecards.org/cgi-bin/carddisp.pl?gene=PDE4A
PPP1R9B	Protein Phosphatase 1 Regulatory Subunit 9B	Protein Coding	Q96SB3	48	GC17M050133	19.9765	https://www.genecards.org/cgi-bin/carddisp.pl?gene=PPP1R9B
TRNT1	TRNA Nucleotidyl Transferase 1	Protein Coding	Q96Q11	49	GC03P003126	19.9733	https://www.genecards.org/cgi-bin/carddisp.pl?gene=TRNT1
TH	Tyrosine Hydroxylase	Protein Coding	P07101	57	GC11M002163	19.9717	https://www.genecards.org/cgi-bin/carddisp.pl?gene=TH
RPS27	Ribosomal Protein S27	Protein Coding	P42677	49	GC01P154874	19.9685	https://www.genecards.org/cgi-bin/carddisp.pl?gene=RPS27
SCN1B	Sodium Voltage-Gated Channel Beta Subunit 1	Protein Coding	Q07699	53	GC19P035030	19.9592	https://www.genecards.org/cgi-bin/carddisp.pl?gene=SCN1B
SCRIB	Scribble Planar Cell Polarity Protein	Protein Coding	C0HLS1	47	GC08M146021	19.9521	https://www.genecards.org/cgi-bin/carddisp.pl?gene=SCRIB
KLF5	KLF Transcription Factor 5	Protein Coding	Q13887	52	GC13P073054	19.9508	https://www.genecards.org/cgi-bin/carddisp.pl?gene=KLF5
NEDD4	NEDD4 E3 Ubiquitin Protein Ligase	Protein Coding	P46934	54	GC15M055826	19.9497	https://www.genecards.org/cgi-bin/carddisp.pl?gene=NEDD4
ZBTB24	Zinc Finger And BTB Domain Containing 24	Protein Coding	O43167	45	GC06M109476	19.9428	https://www.genecards.org/cgi-bin/carddisp.pl?gene=ZBTB24
DUSP1	Dual Specificity Phosphatase 1	Protein Coding	P28562	52	GC05M172768	19.9404	https://www.genecards.org/cgi-bin/carddisp.pl?gene=DUSP1
GNB1	G Protein Subunit Beta 1	Protein Coding	P62873	52	GC01M001785	19.9395	https://www.genecards.org/cgi-bin/carddisp.pl?gene=GNB1
TNNI3	Troponin I3, Cardiac Type	Protein Coding	P19429	55	GC19M055151	19.9392	https://www.genecards.org/cgi-bin/carddisp.pl?gene=TNNI3
NPPA	Natriuretic Peptide A	Protein Coding	P01160	52	GC01M011846	19.9289	https://www.genecards.org/cgi-bin/carddisp.pl?gene=NPPA
MDC1	Mediator Of DNA Damage Checkpoint 1	Protein Coding	Q14676	49	GC06M080847	19.9131	https://www.genecards.org/cgi-bin/carddisp.pl?gene=MDC1
BATF	Basic Leucine Zipper ATF-Like Transcription Factor	Protein Coding	Q16520	46	GC14P075523	19.9113	https://www.genecards.org/cgi-bin/carddisp.pl?gene=BATF
ACKR3	Atypical Chemokine Receptor 3	Protein Coding	P25106	49	GC02P236537	19.9099	https://www.genecards.org/cgi-bin/carddisp.pl?gene=ACKR3
CCAR1	Cell Division Cycle And Apoptosis Regulator 1	Protein Coding	Q8IX12	45	GC10P068721	19.9074	https://www.genecards.org/cgi-bin/carddisp.pl?gene=CCAR1
LTF	Lactotransferrin	Protein Coding	P02788	52	GC03M046435	19.9069	https://www.genecards.org/cgi-bin/carddisp.pl?gene=LTF
ELMO1	Engulfment And Cell Motility 1	Protein Coding	Q92556	48	GC07M036860	19.9058	https://www.genecards.org/cgi-bin/carddisp.pl?gene=ELMO1
IL33	Interleukin 33	Protein Coding	O95760	45	GC09P008195	19.9013	https://www.genecards.org/cgi-bin/carddisp.pl?gene=IL33
DEK	DEK Proto-Oncogene	Protein Coding	P35659	47	GC06M018224	19.8991	https://www.genecards.org/cgi-bin/carddisp.pl?gene=DEK
PPP1R10	Protein Phosphatase 1 Regulatory Subunit 10	Protein Coding	Q96QC0	46	GC06M030600	19.8934	https://www.genecards.org/cgi-bin/carddisp.pl?gene=PPP1R10
POLH	DNA Polymerase Eta	Protein Coding	Q9Y253	55	GC06P043576	19.8896	https://www.genecards.org/cgi-bin/carddisp.pl?gene=POLH
GGPS1	Geranylgeranyl Diphosphate Synthase 1	Protein Coding	O95749	50	GC01P235327	19.8714	https://www.genecards.org/cgi-bin/carddisp.pl?gene=GGPS1
EDNRB	Endothelin Receptor Type B	Protein Coding	P24530	57	GC13M077895	19.8544	https://www.genecards.org/cgi-bin/carddisp.pl?gene=EDNRB
VTI1B	Vesicle Transport Through Interaction With T-SNAREs 1B	Protein Coding	Q9UEU0	46	GC14M067647	19.8541	https://www.genecards.org/cgi-bin/carddisp.pl?gene=VTI1B
RNASEL	Ribonuclease L	Protein Coding	Q05823	50	GC01M182573	19.8398	https://www.genecards.org/cgi-bin/carddisp.pl?gene=RNASEL
SNAP25	Synaptosome Associated Protein 25	Protein Coding	P60880	56	GC20P010207	19.8365	https://www.genecards.org/cgi-bin/carddisp.pl?gene=SNAP25
IREB2	Iron Responsive Element Binding Protein 2	Protein Coding	P48200	51	GC15P078437	19.8326	https://www.genecards.org/cgi-bin/carddisp.pl?gene=IREB2
SERPINF1	Serpin Family F Member 1	Protein Coding	P36955	52	GC17P002420	19.8233	https://www.genecards.org/cgi-bin/carddisp.pl?gene=SERPINF1
CREB3	CAMP Responsive Element Binding Protein 3	Protein Coding	O43889	44	GC09P052013	19.814	https://www.genecards.org/cgi-bin/carddisp.pl?gene=CREB3
GNB3	G Protein Subunit Beta 3	Protein Coding	P16520	53	GC12P006839	19.8107	https://www.genecards.org/cgi-bin/carddisp.pl?gene=GNB3
PIK3C3	Phosphatidylinositol 3-Kinase Catalytic Subunit Type 3	Protein Coding	Q8NEB9	56	GC18P041955	19.8066	https://www.genecards.org/cgi-bin/carddisp.pl?gene=PIK3C3
CLN3	CLN3 Lysosomal/Endosomal Transmembrane Protein, Battenin	Protein Coding	Q13286	50	GC16M028466	19.7989	https://www.genecards.org/cgi-bin/carddisp.pl?gene=CLN3
TCF12	Transcription Factor 12	Protein Coding	Q99081	53	GC15P056918	19.7884	https://www.genecards.org/cgi-bin/carddisp.pl?gene=TCF12
NPY	Neuropeptide Y	Protein Coding	P01303	51	GC07P024290	19.7847	https://www.genecards.org/cgi-bin/carddisp.pl?gene=NPY
CDC20	Cell Division Cycle 20	Protein Coding	Q12834	52	GC01P043358	19.7835	https://www.genecards.org/cgi-bin/carddisp.pl?gene=CDC20
NCR1	Natural Cytotoxicity Triggering Receptor 1	Protein Coding	O76036	46	GC19P083922	19.7824	https://www.genecards.org/cgi-bin/carddisp.pl?gene=NCR1
SELPLG	Selectin P Ligand	Protein Coding	Q14242	50	GC12M108621	19.7768	https://www.genecards.org/cgi-bin/carddisp.pl?gene=SELPLG
TSHR	Thyroid Stimulating Hormone Receptor	Protein Coding	P16473	54	GC14P080954	19.776	https://www.genecards.org/cgi-bin/carddisp.pl?gene=TSHR
NSD2	Nuclear Receptor Binding SET Domain Protein 2	Protein Coding	O96028	50	GC04P001973	19.7229	https://www.genecards.org/cgi-bin/carddisp.pl?gene=NSD2
YBX1	Y-Box Binding Protein 1	Protein Coding	P67809	47	GC01P042682	19.7205	https://www.genecards.org/cgi-bin/carddisp.pl?gene=YBX1
MTAP	Methylthioadenosine Phosphorylase	Protein Coding	Q13126	56	GC09P021806	19.7193	https://www.genecards.org/cgi-bin/carddisp.pl?gene=MTAP
KRT1	Keratin 1	Protein Coding	P04264	54	GC12M052674	19.7182	https://www.genecards.org/cgi-bin/carddisp.pl?gene=KRT1
PPP2R3A	Protein Phosphatase 2 Regulatory Subunit B''Alpha	Protein Coding	Q06190	45	GC03P135965	19.6967	https://www.genecards.org/cgi-bin/carddisp.pl?gene=PPP2R3A
GRP	Gastrin Releasing Peptide	Protein Coding	P07492	47	GC18P059220	19.6877	https://www.genecards.org/cgi-bin/carddisp.pl?gene=GRP
LRRC32	Leucine Rich Repeat Containing 32	Protein Coding	Q14392	48	GC11M076657	19.6849	https://www.genecards.org/cgi-bin/carddisp.pl?gene=LRRC32
TYROBP	Transmembrane Immune Signaling Adaptor TYROBP	Protein Coding	O43914	49	GC19M035904	19.6775	https://www.genecards.org/cgi-bin/carddisp.pl?gene=TYROBP
MB	Myoglobin	Protein Coding	P02144	51	GC22M035606	19.6742	https://www.genecards.org/cgi-bin/carddisp.pl?gene=MB
PAWR	Pro-Apoptotic WT1 Regulator	Protein Coding	Q96IZ0	48	GC12M079574	19.6564	https://www.genecards.org/cgi-bin/carddisp.pl?gene=PAWR
RC3H1	Ring Finger And CCCH-Type Domains 1	Protein Coding	Q5TC82	43	GC01M173931	19.6518	https://www.genecards.org/cgi-bin/carddisp.pl?gene=RC3H1
RHD	Rh Blood Group D Antigen	Protein Coding	Q02161	48	GC01P025272	19.6429	https://www.genecards.org/cgi-bin/carddisp.pl?gene=RHD
AXIN2	Axin 2	Protein Coding	Q9Y2T1	55	GC17M065528	19.6296	https://www.genecards.org/cgi-bin/carddisp.pl?gene=AXIN2
TRPV4	Transient Receptor Potential Cation Channel Subfamily V Member 4	Protein Coding	Q9HBA0	55	GC12M109783	19.629	https://www.genecards.org/cgi-bin/carddisp.pl?gene=TRPV4
IGFBP2	Insulin Like Growth Factor Binding Protein 2	Protein Coding	P18065	50	GC02P216632	19.6274	https://www.genecards.org/cgi-bin/carddisp.pl?gene=IGFBP2
CGA	Glycoprotein Hormones, Alpha Polypeptide	Protein Coding	P01215	52	GC06M087085	19.6223	https://www.genecards.org/cgi-bin/carddisp.pl?gene=CGA
XCL1	X-C Motif Chemokine Ligand 1	Protein Coding	P47992	44	GC01P168576	19.6173	https://www.genecards.org/cgi-bin/carddisp.pl?gene=XCL1
NCL	Nucleolin	Protein Coding	P19338	50	GC02M231453	19.6111	https://www.genecards.org/cgi-bin/carddisp.pl?gene=NCL
SP3	Sp3 Transcription Factor	Protein Coding	Q02447	50	GC02M173882	19.6035	https://www.genecards.org/cgi-bin/carddisp.pl?gene=SP3
IKZF2	IKAROS Family Zinc Finger 2	Protein Coding	Q9UKS7	47	GC02M213001	19.6009	https://www.genecards.org/cgi-bin/carddisp.pl?gene=IKZF2
COL17A1	Collagen Type XVII Alpha 1 Chain	Protein Coding	Q9UMD9	51	GC10M104031	19.5981	https://www.genecards.org/cgi-bin/carddisp.pl?gene=COL17A1
MERTK	MER Proto-Oncogene, Tyrosine Kinase	Protein Coding	Q12866	58	GC02P111898	19.581	https://www.genecards.org/cgi-bin/carddisp.pl?gene=MERTK
RPL35A	Ribosomal Protein L35a	Protein Coding	P18077	49	GC03P197949	19.5781	https://www.genecards.org/cgi-bin/carddisp.pl?gene=RPL35A
CCK	Cholecystokinin	Protein Coding	P06307	48	GC03M042274	19.572	https://www.genecards.org/cgi-bin/carddisp.pl?gene=CCK
RPS6KA1	Ribosomal Protein S6 Kinase A1	Protein Coding	Q15418	57	GC01P029441	19.5632	https://www.genecards.org/cgi-bin/carddisp.pl?gene=RPS6KA1
SDHD	Succinate Dehydrogenase Complex Subunit D	Protein Coding	O14521	52	GC11P112156	19.5609	https://www.genecards.org/cgi-bin/carddisp.pl?gene=SDHD
PRDX1	Peroxiredoxin 1	Protein Coding	Q06830	56	GC01M045622	19.5575	https://www.genecards.org/cgi-bin/carddisp.pl?gene=PRDX1
ITIH4	Inter-Alpha-Trypsin Inhibitor Heavy Chain 4	Protein Coding	Q14624	48	GC03M052812	19.5549	https://www.genecards.org/cgi-bin/carddisp.pl?gene=ITIH4
DST	Dystonin	Protein Coding	Q03001	49	GC06M056457	19.5502	https://www.genecards.org/cgi-bin/carddisp.pl?gene=DST
UBASH3B	Ubiquitin Associated And SH3 Domain Containing B	Protein Coding	Q8TF42	48	GC11P122655	19.5485	https://www.genecards.org/cgi-bin/carddisp.pl?gene=UBASH3B
HSP90B1	Heat Shock Protein 90 Beta Family Member 1	Protein Coding	P14625	54	GC12P103930	19.5351	https://www.genecards.org/cgi-bin/carddisp.pl?gene=HSP90B1
GNAI2	G Protein Subunit Alpha I2	Protein Coding	P04899	53	GC03P050226	19.5294	https://www.genecards.org/cgi-bin/carddisp.pl?gene=GNAI2
NPPB	Natriuretic Peptide B	Protein Coding	P16860	50	GC01M011858	19.5087	https://www.genecards.org/cgi-bin/carddisp.pl?gene=NPPB
PF4	Platelet Factor 4	Protein Coding	P02776	46	GC04M073980	19.5017	https://www.genecards.org/cgi-bin/carddisp.pl?gene=PF4
CDX2	Caudal Type Homeobox 2	Protein Coding	Q99626	48	GC13M027962	19.4957	https://www.genecards.org/cgi-bin/carddisp.pl?gene=CDX2
ILK	Integrin Linked Kinase	Protein Coding	Q13418	51	GC11P006604	19.4914	https://www.genecards.org/cgi-bin/carddisp.pl?gene=ILK
DRC1	Dynein Regulatory Complex Subunit 1	Protein Coding	Q96MC2	41	GC02P026401	19.4893	https://www.genecards.org/cgi-bin/carddisp.pl?gene=DRC1
PTPRS	Protein Tyrosine Phosphatase Receptor Type S	Protein Coding	Q13332	52	GC19M009362	19.4756	https://www.genecards.org/cgi-bin/carddisp.pl?gene=PTPRS
KIR2DL1	Killer Cell Immunoglobulin Like Receptor, Two Ig Domains And Long Cytoplasmic Tail 1	Protein Coding	P43626	42	GC19P083914	19.459	https://www.genecards.org/cgi-bin/carddisp.pl?gene=KIR2DL1
PPP2R5B	Protein Phosphatase 2 Regulatory Subunit B'Beta	Protein Coding	Q15173	44	GC11P064918	19.4448	https://www.genecards.org/cgi-bin/carddisp.pl?gene=PPP2R5B
ZNF793	Zinc Finger Protein 793	Protein Coding	Q6ZN11	37	GC19P037506	19.442	https://www.genecards.org/cgi-bin/carddisp.pl?gene=ZNF793
SFRP1	Secreted Frizzled Related Protein 1	Protein Coding	Q8N474	50	GC08M041262	19.4343	https://www.genecards.org/cgi-bin/carddisp.pl?gene=SFRP1
KCNJ2	Potassium Inwardly Rectifying Channel Subfamily J Member 2	Protein Coding	P63252	55	GC17P070168	19.4336	https://www.genecards.org/cgi-bin/carddisp.pl?gene=KCNJ2
MOG	Myelin Oligodendrocyte Glycoprotein	Protein Coding	Q16653	52	GC06P104040	19.4256	https://www.genecards.org/cgi-bin/carddisp.pl?gene=MOG
MAP3K2	Mitogen-Activated Protein Kinase Kinase Kinase 2	Protein Coding	Q9Y2U5	52	GC02M127298	19.4138	https://www.genecards.org/cgi-bin/carddisp.pl?gene=MAP3K2
RPS7	Ribosomal Protein S7	Protein Coding	P62081	49	GC02P003575	19.4115	https://www.genecards.org/cgi-bin/carddisp.pl?gene=RPS7
YWHAZ	Tyrosine 3-Monooxygenase/Tryptophan 5-Monooxygenase Activation Protein Zeta	Protein Coding	P63104	53	GC08M100917	19.4076	https://www.genecards.org/cgi-bin/carddisp.pl?gene=YWHAZ
H3C1	H3 Clustered Histone 1	Protein Coding	P68431	45	GC06P103886	19.4049	https://www.genecards.org/cgi-bin/carddisp.pl?gene=H3C1
TUBB	Tubulin Beta Class I	Protein Coding	P07437	56	GC06P104078	19.4	https://www.genecards.org/cgi-bin/carddisp.pl?gene=TUBB
PPP2R2D	Protein Phosphatase 2 Regulatory Subunit Bdelta	Protein Coding	Q66LE6	42	GC10P131900	19.3951	https://www.genecards.org/cgi-bin/carddisp.pl?gene=PPP2R2D
UBC	Ubiquitin C	Protein Coding	P0CG48	50	GC12M124911	19.3778	https://www.genecards.org/cgi-bin/carddisp.pl?gene=UBC
RPSA	Ribosomal Protein SA	Protein Coding	P08865	53	GC03P039406	19.3664	https://www.genecards.org/cgi-bin/carddisp.pl?gene=RPSA
TRAF3IP2	TRAF3 Interacting Protein 2	Protein Coding	O43734	52	GC06M111555	19.349	https://www.genecards.org/cgi-bin/carddisp.pl?gene=TRAF3IP2
ACE2	Angiotensin Converting Enzyme 2	Protein Coding	Q9BYF1	56	GC0XM015494	19.3479	https://www.genecards.org/cgi-bin/carddisp.pl?gene=ACE2
BCAM	Basal Cell Adhesion Molecule (Lutheran Blood Group)	Protein Coding	P50895	46	GC19P083469	19.3451	https://www.genecards.org/cgi-bin/carddisp.pl?gene=BCAM
SDHA	Succinate Dehydrogenase Complex Flavoprotein Subunit A	Protein Coding	P31040	55	GC05P000220	19.3447	https://www.genecards.org/cgi-bin/carddisp.pl?gene=SDHA
ANAPC1	Anaphase Promoting Complex Subunit 1	Protein Coding	Q9H1A4	49	GC02M111611	19.335	https://www.genecards.org/cgi-bin/carddisp.pl?gene=ANAPC1
RBCK1	RANBP2-Type And C3HC4-Type Zinc Finger Containing 1	Protein Coding	Q9BYM8	48	GC20P000407	19.3193	https://www.genecards.org/cgi-bin/carddisp.pl?gene=RBCK1
ERVW-1	Endogenous Retrovirus Group W Member 1, Envelope	Protein Coding	Q9UQF0	42	GC07M092468	19.3168	https://www.genecards.org/cgi-bin/carddisp.pl?gene=ERVW-1
INO80	INO80 Complex ATPase Subunit	Protein Coding	Q9ULG1	44	GC15M040979	19.316	https://www.genecards.org/cgi-bin/carddisp.pl?gene=INO80
F2RL1	F2R Like Trypsin Receptor 1	Protein Coding	P55085	50	GC05P076818	19.3133	https://www.genecards.org/cgi-bin/carddisp.pl?gene=F2RL1
HBA1	Hemoglobin Subunit Alpha 1	Protein Coding	P69905	49	GC16P021338	19.3083	https://www.genecards.org/cgi-bin/carddisp.pl?gene=HBA1
CRH	Corticotropin Releasing Hormone	Protein Coding	P06850	50	GC08M066176	19.3026	https://www.genecards.org/cgi-bin/carddisp.pl?gene=CRH
ITGA1	Integrin Subunit Alpha 1	Protein Coding	P56199	50	GC05P052788	19.2882	https://www.genecards.org/cgi-bin/carddisp.pl?gene=ITGA1
TSPAN7	Tetraspanin 7	Protein Coding	P41732	52	GC0XP038561	19.2791	https://www.genecards.org/cgi-bin/carddisp.pl?gene=TSPAN7
SERPINA1	Serpin Family A Member 1	Protein Coding	P01009	56	GC14M094376	19.277	https://www.genecards.org/cgi-bin/carddisp.pl?gene=SERPINA1
LAIR1	Leukocyte Associated Immunoglobulin Like Receptor 1	Protein Coding	Q6GTX8	49	GC19M054351	19.2704	https://www.genecards.org/cgi-bin/carddisp.pl?gene=LAIR1
ACTN1	Actinin Alpha 1	Protein Coding	P12814	56	GC14M068874	19.2666	https://www.genecards.org/cgi-bin/carddisp.pl?gene=ACTN1
KRT10	Keratin 10	Protein Coding	P13645	50	GC17M040818	19.2656	https://www.genecards.org/cgi-bin/carddisp.pl?gene=KRT10
RRM2	Ribonucleotide Reductase Regulatory Subunit M2	Protein Coding	P31350	55	GC02P010124	19.2602	https://www.genecards.org/cgi-bin/carddisp.pl?gene=RRM2
RBM15	RNA Binding Motif Protein 15	Protein Coding	Q96T37	44	GC01P110338	19.2585	https://www.genecards.org/cgi-bin/carddisp.pl?gene=RBM15
AGT	Angiotensinogen	Protein Coding	P01019	56	GC01M230690	19.258	https://www.genecards.org/cgi-bin/carddisp.pl?gene=AGT
MUS81	MUS81 Structure-Specific Endonuclease Subunit	Protein Coding	Q96NY9	47	GC11P072933	19.2539	https://www.genecards.org/cgi-bin/carddisp.pl?gene=MUS81
TAPBP	TAP Binding Protein	Protein Coding	O15533	51	GC06M033299	19.2461	https://www.genecards.org/cgi-bin/carddisp.pl?gene=TAPBP
CNOT9	CCR4-NOT Transcription Complex Subunit 9	Protein Coding	Q92600	44	GC02P218571	19.2346	https://www.genecards.org/cgi-bin/carddisp.pl?gene=CNOT9
ID1	Inhibitor Of DNA Binding 1	Protein Coding	P41134	48	GC20P031605	19.2325	https://www.genecards.org/cgi-bin/carddisp.pl?gene=ID1
SLC11A2	Solute Carrier Family 11 Member 2	Protein Coding	P49281	54	GC12M050952	19.2297	https://www.genecards.org/cgi-bin/carddisp.pl?gene=SLC11A2
RYR2	Ryanodine Receptor 2	Protein Coding	Q92736	53	GC01P237042	19.223	https://www.genecards.org/cgi-bin/carddisp.pl?gene=RYR2
RBM38	RNA Binding Motif Protein 38	Protein Coding	Q9H0Z9	44	GC20P057391	19.2135	https://www.genecards.org/cgi-bin/carddisp.pl?gene=RBM38
PRKAG2	Protein Kinase AMP-Activated Non-Catalytic Subunit Gamma 2	Protein Coding	Q9UGJ0	56	GC07M151556	19.1916	https://www.genecards.org/cgi-bin/carddisp.pl?gene=PRKAG2
MYSM1	Myb Like, SWIRM And MPN Domains 1	Protein Coding	Q5VVJ2	46	GC01M058696	19.1892	https://www.genecards.org/cgi-bin/carddisp.pl?gene=MYSM1
PLEK	Pleckstrin	Protein Coding	P08567	47	GC02P068365	19.1818	https://www.genecards.org/cgi-bin/carddisp.pl?gene=PLEK
S100A4	S100 Calcium Binding Protein A4	Protein Coding	P26447	52	GC01M153543	19.1803	https://www.genecards.org/cgi-bin/carddisp.pl?gene=S100A4
F2R	Coagulation Factor II Thrombin Receptor	Protein Coding	P25116	53	GC05P076716	19.1796	https://www.genecards.org/cgi-bin/carddisp.pl?gene=F2R
MFN2	Mitofusin 2	Protein Coding	O95140	55	GC01P011980	19.1708	https://www.genecards.org/cgi-bin/carddisp.pl?gene=MFN2
PPP6R2	Protein Phosphatase 6 Regulatory Subunit 2	Protein Coding	O75170	45	GC22P050330	19.1669	https://www.genecards.org/cgi-bin/carddisp.pl?gene=PPP6R2
MPZ	Myelin Protein Zero	Protein Coding	P25189	52	GC01M161304	19.1637	https://www.genecards.org/cgi-bin/carddisp.pl?gene=MPZ
DCN	Decorin	Protein Coding	P07585	54	GC12M091140	19.1608	https://www.genecards.org/cgi-bin/carddisp.pl?gene=DCN
CTSL	Cathepsin L	Protein Coding	P07711	54	GC09P087725	19.1347	https://www.genecards.org/cgi-bin/carddisp.pl?gene=CTSL
SPTA1	Spectrin Alpha, Erythrocytic 1	Protein Coding	P02549	51	GC01M158610	19.132	https://www.genecards.org/cgi-bin/carddisp.pl?gene=SPTA1
OLR1	Oxidized Low Density Lipoprotein Receptor 1	Protein Coding	P78380	49	GC12M024903	19.1309	https://www.genecards.org/cgi-bin/carddisp.pl?gene=OLR1
SLC1A3	Solute Carrier Family 1 Member 3	Protein Coding	P43003	55	GC05P036660	19.129	https://www.genecards.org/cgi-bin/carddisp.pl?gene=SLC1A3
LIPC	Lipase C, Hepatic Type	Protein Coding	P11150	52	GC15P058410	19.1247	https://www.genecards.org/cgi-bin/carddisp.pl?gene=LIPC
CDCA7	Cell Division Cycle Associated 7	Protein Coding	Q9BWT1	49	GC02P173354	19.1222	https://www.genecards.org/cgi-bin/carddisp.pl?gene=CDCA7
CCR10	C-C Motif Chemokine Receptor 10	Protein Coding	P46092	42	GC17M042678	19.1207	https://www.genecards.org/cgi-bin/carddisp.pl?gene=CCR10
PRMT5	Protein Arginine Methyltransferase 5	Protein Coding	O14744	53	GC14M022920	19.1167	https://www.genecards.org/cgi-bin/carddisp.pl?gene=PRMT5
ETS2	ETS Proto-Oncogene 2, Transcription Factor	Protein Coding	P15036	48	GC21P038805	19.1083	https://www.genecards.org/cgi-bin/carddisp.pl?gene=ETS2
KRIT1	KRIT1 Ankyrin Repeat Containing	Protein Coding	O00522	49	GC07M092198	19.1073	https://www.genecards.org/cgi-bin/carddisp.pl?gene=KRIT1
MTF1	Metal Regulatory Transcription Factor 1	Protein Coding	Q14872	48	GC01M037810	19.0996	https://www.genecards.org/cgi-bin/carddisp.pl?gene=MTF1
ATF3	Activating Transcription Factor 3	Protein Coding	P18847	51	GC01P212565	19.0916	https://www.genecards.org/cgi-bin/carddisp.pl?gene=ATF3
FGA	Fibrinogen Alpha Chain	Protein Coding	P02671	56	GC04M154583	19.088	https://www.genecards.org/cgi-bin/carddisp.pl?gene=FGA
COTL1	Coactosin Like F-Actin Binding Protein 1	Protein Coding	Q14019	46	GC16M084566	19.0709	https://www.genecards.org/cgi-bin/carddisp.pl?gene=COTL1
CDH3	Cadherin 3	Protein Coding	P22223	54	GC16P068699	19.0687	https://www.genecards.org/cgi-bin/carddisp.pl?gene=CDH3
ENPP1	Ectonucleotide Pyrophosphatase/Phosphodiesterase 1	Protein Coding	P22413	56	GC06P131808	19.0633	https://www.genecards.org/cgi-bin/carddisp.pl?gene=ENPP1
CX3CL1	C-X3-C Motif Chemokine Ligand 1	Protein Coding	P78423	50	GC16P057372	19.0595	https://www.genecards.org/cgi-bin/carddisp.pl?gene=CX3CL1
GNRH1	Gonadotropin Releasing Hormone 1	Protein Coding	P01148	47	GC08M025419	19.0485	https://www.genecards.org/cgi-bin/carddisp.pl?gene=GNRH1
CD52	CD52 Molecule	Protein Coding	P31358	44	GC01P026317	19.0459	https://www.genecards.org/cgi-bin/carddisp.pl?gene=CD52
METTL3	Methyltransferase 3, N6-Adenosine-Methyltransferase Complex Catalytic Subunit	Protein Coding	Q86U44	48	GC14M021498	19.0456	https://www.genecards.org/cgi-bin/carddisp.pl?gene=METTL3
PMAIP1	Phorbol-12-Myristate-13-Acetate-Induced Protein 1	Protein Coding	Q13794	45	GC18P059899	19.0446	https://www.genecards.org/cgi-bin/carddisp.pl?gene=PMAIP1
SAG	S-Antigen Visual Arrestin	Protein Coding	P10523	52	GC02P233413	19.0425	https://www.genecards.org/cgi-bin/carddisp.pl?gene=SAG
BTRC	Beta-Transducin Repeat Containing E3 Ubiquitin Protein Ligase	Protein Coding	Q9Y297	52	GC10P101354	19.0333	https://www.genecards.org/cgi-bin/carddisp.pl?gene=BTRC
ELK1	ETS Transcription Factor ELK1	Protein Coding	P19419	50	GC0XM047635	19.0253	https://www.genecards.org/cgi-bin/carddisp.pl?gene=ELK1
LAMA3	Laminin Subunit Alpha 3	Protein Coding	Q16787	52	GC18P023689	19.01	https://www.genecards.org/cgi-bin/carddisp.pl?gene=LAMA3
MAP3K3	Mitogen-Activated Protein Kinase Kinase Kinase 3	Protein Coding	Q99759	53	GC17P063622	19.0057	https://www.genecards.org/cgi-bin/carddisp.pl?gene=MAP3K3
VTI1A	Vesicle Transport Through Interaction With T-SNAREs 1A	Protein Coding	Q96AJ9	45	GC10P112446	19.002	https://www.genecards.org/cgi-bin/carddisp.pl?gene=VTI1A
MAL2	Mal, T Cell Differentiation Protein 2	Protein Coding	Q969L2	40	GC08P119165	19.0016	https://www.genecards.org/cgi-bin/carddisp.pl?gene=MAL2
CRBN	Cereblon	Protein Coding	Q96SW2	50	GC03M003144	19.0015	https://www.genecards.org/cgi-bin/carddisp.pl?gene=CRBN
NDRG1	N-Myc Downstream Regulated 1	Protein Coding	Q92597	52	GC08M133237	19.0009	https://www.genecards.org/cgi-bin/carddisp.pl?gene=NDRG1
CDK5RAP3	CDK5 Regulatory Subunit Associated Protein 3	Protein Coding	Q96JB5	44	GC17P047967	18.9907	https://www.genecards.org/cgi-bin/carddisp.pl?gene=CDK5RAP3
BCAR1	BCAR1 Scaffold Protein, Cas Family Member	Protein Coding	P56945	50	GC16M075228	18.9828	https://www.genecards.org/cgi-bin/carddisp.pl?gene=BCAR1
H4C16	H4 Histone 16	Protein Coding	P62805	43	GC12M025134	18.9804	https://www.genecards.org/cgi-bin/carddisp.pl?gene=H4C16
CSNK2A2	Casein Kinase 2 Alpha 2	Protein Coding	P19784	53	GC16M058157	18.9772	https://www.genecards.org/cgi-bin/carddisp.pl?gene=CSNK2A2
GCG	Glucagon	Protein Coding	P01275	48	GC02M162142	18.9758	https://www.genecards.org/cgi-bin/carddisp.pl?gene=GCG
CDH10	Cadherin 10	Protein Coding	Q9Y6N8	47	GC05M024522	18.9699	https://www.genecards.org/cgi-bin/carddisp.pl?gene=CDH10
HLA-F	Major Histocompatibility Complex, Class I, F	Protein Coding	P30511	46	GC06P104044	18.9679	https://www.genecards.org/cgi-bin/carddisp.pl?gene=HLA-F
HK1	Hexokinase 1	Protein Coding	P19367	56	GC10P069269	18.9679	https://www.genecards.org/cgi-bin/carddisp.pl?gene=HK1
HLA-DOB	Major Histocompatibility Complex, Class II, DO Beta	Protein Coding	P13765	45	GC06M080984	18.9654	https://www.genecards.org/cgi-bin/carddisp.pl?gene=HLA-DOB
ZNF461	Zinc Finger Protein 461	Protein Coding	Q8TAF7	40	GC19M079524	18.9616	https://www.genecards.org/cgi-bin/carddisp.pl?gene=ZNF461
SLC16A1	Solute Carrier Family 16 Member 1	Protein Coding	P53985	54	GC01M113047	18.9363	https://www.genecards.org/cgi-bin/carddisp.pl?gene=SLC16A1
ZFP36L2	ZFP36 Ring Finger Protein Like 2	Protein Coding	P47974	46	GC02M043222	18.9361	https://www.genecards.org/cgi-bin/carddisp.pl?gene=ZFP36L2
SERPINH1	Serpin Family H Member 1	Protein Coding	P50454	53	GC11P075562	18.9255	https://www.genecards.org/cgi-bin/carddisp.pl?gene=SERPINH1
PPP4R3A	Protein Phosphatase 4 Regulatory Subunit 3A	Protein Coding	Q6IN85	44	GC14M115241	18.9251	https://www.genecards.org/cgi-bin/carddisp.pl?gene=PPP4R3A
TAT	Tyrosine Aminotransferase	Protein Coding	P17735	52	GC16M071565	18.9242	https://www.genecards.org/cgi-bin/carddisp.pl?gene=TAT
IL15RA	Interleukin 15 Receptor Subunit Alpha	Protein Coding	Q13261	47	GC10M005943	18.9197	https://www.genecards.org/cgi-bin/carddisp.pl?gene=IL15RA
CDC7	Cell Division Cycle 7	Protein Coding	O00311	53	GC01P091500	18.8841	https://www.genecards.org/cgi-bin/carddisp.pl?gene=CDC7
RPS17	Ribosomal Protein S17	Protein Coding	P08708	50	GC15M082536	18.8804	https://www.genecards.org/cgi-bin/carddisp.pl?gene=RPS17
CD207	CD207 Molecule	Protein Coding	Q9UJ71	46	GC02M070830	18.8795	https://www.genecards.org/cgi-bin/carddisp.pl?gene=CD207
TIAM2	TIAM Rac1 Associated GEF 2	Protein Coding	Q8IVF5	48	GC06P154832	18.8696	https://www.genecards.org/cgi-bin/carddisp.pl?gene=TIAM2
ACHE	Acetylcholinesterase (Cartwright Blood Group)	Protein Coding	P22303	53	GC07M100889	18.8688	https://www.genecards.org/cgi-bin/carddisp.pl?gene=ACHE
FLNB	Filamin B	Protein Coding	O75369	54	GC03P058008	18.8639	https://www.genecards.org/cgi-bin/carddisp.pl?gene=FLNB
SRA1	Steroid Receptor RNA Activator 1	Protein Coding	Q9HD15	45	GC05M140537	18.8603	https://www.genecards.org/cgi-bin/carddisp.pl?gene=SRA1
DAG1	Dystroglycan 1	Protein Coding	Q14118	53	GC03P051590	18.8522	https://www.genecards.org/cgi-bin/carddisp.pl?gene=DAG1
MED12	Mediator Complex Subunit 12	Protein Coding	Q93074	51	GC0XP071118	18.8444	https://www.genecards.org/cgi-bin/carddisp.pl?gene=MED12
SOS2	SOS Ras/Rho Guanine Nucleotide Exchange Factor 2	Protein Coding	Q07890	52	GC14M050117	18.8319	https://www.genecards.org/cgi-bin/carddisp.pl?gene=SOS2
IL24	Interleukin 24	Protein Coding	Q13007	48	GC01P206897	18.82	https://www.genecards.org/cgi-bin/carddisp.pl?gene=IL24
CANX	Calnexin	Protein Coding	P27824	52	GC05P179678	18.8149	https://www.genecards.org/cgi-bin/carddisp.pl?gene=CANX
DRD2	Dopamine Receptor D2	Protein Coding	P14416	56	GC11M113409	18.8145	https://www.genecards.org/cgi-bin/carddisp.pl?gene=DRD2
FKBP1A	FKBP Prolyl Isomerase 1A	Protein Coding	P62942	55	GC20M001369	18.8051	https://www.genecards.org/cgi-bin/carddisp.pl?gene=FKBP1A
PPP4R2	Protein Phosphatase 4 Regulatory Subunit 2	Protein Coding	Q9NY27	42	GC03P072996	18.8034	https://www.genecards.org/cgi-bin/carddisp.pl?gene=PPP4R2
ARID1B	AT-Rich Interaction Domain 1B	Protein Coding	Q8NFD5	51	GC06P156777	18.7994	https://www.genecards.org/cgi-bin/carddisp.pl?gene=ARID1B
RECK	Reversion Inducing Cysteine Rich Protein With Kazal Motifs	Protein Coding	O95980	47	GC09P036036	18.7956	https://www.genecards.org/cgi-bin/carddisp.pl?gene=RECK
IFNAR2	Interferon Alpha And Beta Receptor Subunit 2	Protein Coding	P48551	56	GC21P033229	18.7916	https://www.genecards.org/cgi-bin/carddisp.pl?gene=IFNAR2
PSMD6	Proteasome 26S Subunit, Non-ATPase 6	Protein Coding	Q15008	46	GC03M063973	18.7874	https://www.genecards.org/cgi-bin/carddisp.pl?gene=PSMD6
HAMP	Hepcidin Antimicrobial Peptide	Protein Coding	P81172	50	GC19P083146	18.7865	https://www.genecards.org/cgi-bin/carddisp.pl?gene=HAMP
RPS15	Ribosomal Protein S15	Protein Coding	P62841	46	GC19P001438	18.7858	https://www.genecards.org/cgi-bin/carddisp.pl?gene=RPS15
DMD	Dystrophin	Protein Coding	P11532	52	GC0XM031097	18.7793	https://www.genecards.org/cgi-bin/carddisp.pl?gene=DMD
CIC	Capicua Transcriptional Repressor	Protein Coding	Q96RK0	50	GC19P042268	18.7758	https://www.genecards.org/cgi-bin/carddisp.pl?gene=CIC
STUB1	STIP1 Homology And U-Box Containing Protein 1	Protein Coding	Q9UNE7	52	GC16P021377	18.7584	https://www.genecards.org/cgi-bin/carddisp.pl?gene=STUB1
RIT1	Ras Like Without CAAX 1	Protein Coding	Q92963	53	GC01M155897	18.7543	https://www.genecards.org/cgi-bin/carddisp.pl?gene=RIT1
PRPF8	Pre-MRNA Processing Factor 8	Protein Coding	Q6P2Q9	49	GC17M001650	18.7537	https://www.genecards.org/cgi-bin/carddisp.pl?gene=PRPF8
FTH1	Ferritin Heavy Chain 1	Protein Coding	P02794	57	GC11M061959	18.7534	https://www.genecards.org/cgi-bin/carddisp.pl?gene=FTH1
CXCL1	C-X-C Motif Chemokine Ligand 1	Protein Coding	P09341	49	GC04P073869	18.7521	https://www.genecards.org/cgi-bin/carddisp.pl?gene=CXCL1
HSPBAP1	HSPB1 Associated Protein 1	Protein Coding	Q96EW2	42	GC03M122739	18.7493	https://www.genecards.org/cgi-bin/carddisp.pl?gene=HSPBAP1
PSMD2	Proteasome 26S Subunit Ubiquitin Receptor, Non-ATPase 2	Protein Coding	Q13200	49	GC03P184298	18.7354	https://www.genecards.org/cgi-bin/carddisp.pl?gene=PSMD2
ARID4A	AT-Rich Interaction Domain 4A	Protein Coding	P29374	45	GC14P058298	18.731	https://www.genecards.org/cgi-bin/carddisp.pl?gene=ARID4A
TNFSF18	TNF Superfamily Member 18	Protein Coding	Q9UNG2	44	GC01M173009	18.7286	https://www.genecards.org/cgi-bin/carddisp.pl?gene=TNFSF18
PPP2R3B	Protein Phosphatase 2 Regulatory Subunit B''Beta	Protein Coding	Q9Y5P8	44	GC0XM000361	18.7246	https://www.genecards.org/cgi-bin/carddisp.pl?gene=PPP2R3B
CCR8	C-C Motif Chemokine Receptor 8	Protein Coding	P51685	48	GC03P040154	18.7196	https://www.genecards.org/cgi-bin/carddisp.pl?gene=CCR8
CDK5RAP2	CDK5 Regulatory Subunit Associated Protein 2	Protein Coding	Q96SN8	48	GC09M120388	18.7195	https://www.genecards.org/cgi-bin/carddisp.pl?gene=CDK5RAP2
CD74	CD74 Molecule	Protein Coding	P04233	50	GC05M150378	18.7167	https://www.genecards.org/cgi-bin/carddisp.pl?gene=CD74
LRP1B	LDL Receptor Related Protein 1B	Protein Coding	Q9NZR2	48	GC02M140231	18.7157	https://www.genecards.org/cgi-bin/carddisp.pl?gene=LRP1B
NEK2	NIMA Related Kinase 2	Protein Coding	P51955	57	GC01M211658	18.7146	https://www.genecards.org/cgi-bin/carddisp.pl?gene=NEK2
USP7	Ubiquitin Specific Peptidase 7	Protein Coding	Q93009	56	GC16M008892	18.7096	https://www.genecards.org/cgi-bin/carddisp.pl?gene=USP7
PAK2	P21 (RAC1) Activated Kinase 2	Protein Coding	Q13177	56	GC03P196739	18.6968	https://www.genecards.org/cgi-bin/carddisp.pl?gene=PAK2
DNM1L	Dynamin 1 Like	Protein Coding	O00429	55	GC12P032679	18.6959	https://www.genecards.org/cgi-bin/carddisp.pl?gene=DNM1L
KDM1A	Lysine Demethylase 1A	Protein Coding	O60341	56	GC01P023019	18.6905	https://www.genecards.org/cgi-bin/carddisp.pl?gene=KDM1A
PRDM16	PR/SET Domain 16	Protein Coding	Q9HAZ2	52	GC01P005329	18.6889	https://www.genecards.org/cgi-bin/carddisp.pl?gene=PRDM16
LRP1	LDL Receptor Related Protein 1	Protein Coding	Q07954	54	GC12P057128	18.6864	https://www.genecards.org/cgi-bin/carddisp.pl?gene=LRP1
TUBA1A	Tubulin Alpha 1a	Protein Coding	Q71U36	56	GC12M049184	18.6856	https://www.genecards.org/cgi-bin/carddisp.pl?gene=TUBA1A
DSG2	Desmoglein 2	Protein Coding	Q14126	52	GC18P031498	18.6768	https://www.genecards.org/cgi-bin/carddisp.pl?gene=DSG2
SP140	SP140 Nuclear Body Protein	Protein Coding	Q13342	42	GC02P230203	18.6764	https://www.genecards.org/cgi-bin/carddisp.pl?gene=SP140
RDX	Radixin	Protein Coding	P35241	54	GC11M109864	18.673	https://www.genecards.org/cgi-bin/carddisp.pl?gene=RDX
DYRK1A	Dual Specificity Tyrosine Phosphorylation Regulated Kinase 1A	Protein Coding	Q13627	57	GC21P037365	18.6721	https://www.genecards.org/cgi-bin/carddisp.pl?gene=DYRK1A
RFX6	Regulatory Factor X6	Protein Coding	Q8HWS3	45	GC06P116877	18.6719	https://www.genecards.org/cgi-bin/carddisp.pl?gene=RFX6
MAPKAPK2	MAPK Activated Protein Kinase 2	Protein Coding	P49137	53	GC01P206684	18.6717	https://www.genecards.org/cgi-bin/carddisp.pl?gene=MAPKAPK2
PODXL	Podocalyxin Like	Protein Coding	O00592	50	GC07M131500	18.6681	https://www.genecards.org/cgi-bin/carddisp.pl?gene=PODXL
PLG	Plasminogen	Protein Coding	P00747	56	GC06P160702	18.6655	https://www.genecards.org/cgi-bin/carddisp.pl?gene=PLG
NEDD4L	NEDD4 Like E3 Ubiquitin Protein Ligase	Protein Coding	Q96PU5	52	GC18P058044	18.6624	https://www.genecards.org/cgi-bin/carddisp.pl?gene=NEDD4L
PLA2G2A	Phospholipase A2 Group IIA	Protein Coding	P14555	53	GC01M019975	18.6589	https://www.genecards.org/cgi-bin/carddisp.pl?gene=PLA2G2A
KIR2DL4	Killer Cell Immunoglobulin Like Receptor, Two Ig Domains And Long Cytoplasmic Tail 4	Protein Coding	Q99706	45	GC19P083916	18.6541	https://www.genecards.org/cgi-bin/carddisp.pl?gene=KIR2DL4
CTSG	Cathepsin G	Protein Coding	P08311	52	GC14M024573	18.6428	https://www.genecards.org/cgi-bin/carddisp.pl?gene=CTSG
TRAF5	TNF Receptor Associated Factor 5	Protein Coding	O00463	48	GC01P211326	18.6417	https://www.genecards.org/cgi-bin/carddisp.pl?gene=TRAF5
RPN1	Ribophorin I	Protein Coding	P04843	50	GC03M128619	18.6354	https://www.genecards.org/cgi-bin/carddisp.pl?gene=RPN1
RREB1	Ras Responsive Element Binding Protein 1	Protein Coding	Q92766	49	GC06P007107	18.6341	https://www.genecards.org/cgi-bin/carddisp.pl?gene=RREB1
CCL27	C-C Motif Chemokine Ligand 27	Protein Coding	Q9Y4X3	42	GC09M034662	18.6236	https://www.genecards.org/cgi-bin/carddisp.pl?gene=CCL27
AFDN	Afadin, Adherens Junction Formation Factor	Protein Coding	P55196	49	GC06P167827	18.6192	https://www.genecards.org/cgi-bin/carddisp.pl?gene=AFDN
MXI1	MAX Interactor 1, Dimerization Protein	Protein Coding	P50539	48	GC10P110208	18.6179	https://www.genecards.org/cgi-bin/carddisp.pl?gene=MXI1
TINCR	TINCR Ubiquitin Domain Containing	Protein Coding	A0A2R8Y7D0	29	GC19M005558	18.6164	https://www.genecards.org/cgi-bin/carddisp.pl?gene=TINCR
GLA	Galactosidase Alpha	Protein Coding	P06280	56	GC0XM101393	18.5968	https://www.genecards.org/cgi-bin/carddisp.pl?gene=GLA
BANK1	B Cell Scaffold Protein With Ankyrin Repeats 1	Protein Coding	Q8NDB2	43	GC04P101411	18.5928	https://www.genecards.org/cgi-bin/carddisp.pl?gene=BANK1
SPTB	Spectrin Beta, Erythrocytic	Protein Coding	P11277	49	GC14M064746	18.5918	https://www.genecards.org/cgi-bin/carddisp.pl?gene=SPTB
SLC9A1	Solute Carrier Family 9 Member A1	Protein Coding	P19634	57	GC01M029374	18.5846	https://www.genecards.org/cgi-bin/carddisp.pl?gene=SLC9A1
RPL18	Ribosomal Protein L18	Protein Coding	Q07020	51	GC19M048615	18.5811	https://www.genecards.org/cgi-bin/carddisp.pl?gene=RPL18
GCLM	Glutamate-Cysteine Ligase Modifier Subunit	Protein Coding	P48507	48	GC01M093885	18.5801	https://www.genecards.org/cgi-bin/carddisp.pl?gene=GCLM
S100A9	S100 Calcium Binding Protein A9	Protein Coding	P06702	50	GC01P153357	18.5725	https://www.genecards.org/cgi-bin/carddisp.pl?gene=S100A9
TNFRSF10C	TNF Receptor Superfamily Member 10c	Protein Coding	O14798	46	GC08P023102	18.5708	https://www.genecards.org/cgi-bin/carddisp.pl?gene=TNFRSF10C
NR4A3	Nuclear Receptor Subfamily 4 Group A Member 3	Protein Coding	Q92570	50	GC09P099821	18.5676	https://www.genecards.org/cgi-bin/carddisp.pl?gene=NR4A3
HBZ	Hemoglobin Subunit Zeta	Protein Coding	P02008	44	GC16P000142	18.5627	https://www.genecards.org/cgi-bin/carddisp.pl?gene=HBZ
DLC1	DLC1 Rho GTPase Activating Protein	Protein Coding	Q96QB1	52	GC08M013083	18.5623	https://www.genecards.org/cgi-bin/carddisp.pl?gene=DLC1
HMGA1	High Mobility Group AT-Hook 1	Protein Coding	P17096	53	GC06P104203	18.5615	https://www.genecards.org/cgi-bin/carddisp.pl?gene=HMGA1
AQP4	Aquaporin 4	Protein Coding	P55087	53	GC18M026852	18.5505	https://www.genecards.org/cgi-bin/carddisp.pl?gene=AQP4
TINF2	TERF1 Interacting Nuclear Factor 2	Protein Coding	Q9BSI4	48	GC14M025392	18.534	https://www.genecards.org/cgi-bin/carddisp.pl?gene=TINF2
RFX3	Regulatory Factor X3	Protein Coding	P48380	46	GC09M003214	18.526	https://www.genecards.org/cgi-bin/carddisp.pl?gene=RFX3
HTT	Huntingtin	Protein Coding	P42858	50	GC04P003041	18.5254	https://www.genecards.org/cgi-bin/carddisp.pl?gene=HTT
SLMAP	Sarcolemma Associated Protein	Protein Coding	Q14BN4	46	GC03P057928	18.5221	https://www.genecards.org/cgi-bin/carddisp.pl?gene=SLMAP
DIPK1A	Divergent Protein Kinase Domain 1A	Protein Coding	Q5T7M9	40	GC01M092833	18.5073	https://www.genecards.org/cgi-bin/carddisp.pl?gene=DIPK1A
ASNS	Asparagine Synthetase (Glutamine-Hydrolyzing)	Protein Coding	P08243	53	GC07M097854	18.5038	https://www.genecards.org/cgi-bin/carddisp.pl?gene=ASNS
ECT2	Epithelial Cell Transforming 2	Protein Coding	Q9H8V3	49	GC03P172750	18.5029	https://www.genecards.org/cgi-bin/carddisp.pl?gene=ECT2
EPHB4	EPH Receptor B4	Protein Coding	P54760	60	GC07M104004	18.5007	https://www.genecards.org/cgi-bin/carddisp.pl?gene=EPHB4
KRT17	Keratin 17	Protein Coding	Q04695	50	GC17M041619	18.4954	https://www.genecards.org/cgi-bin/carddisp.pl?gene=KRT17
MYO7A	Myosin VIIA	Protein Coding	Q13402	50	GC11P077128	18.4904	https://www.genecards.org/cgi-bin/carddisp.pl?gene=MYO7A
KANSL1	KAT8 Regulatory NSL Complex Subunit 1	Protein Coding	Q7Z3B3	47	GC17M061090	18.484	https://www.genecards.org/cgi-bin/carddisp.pl?gene=KANSL1
CD200R1	CD200 Receptor 1	Protein Coding	Q8TD46	45	GC03M112921	18.4707	https://www.genecards.org/cgi-bin/carddisp.pl?gene=CD200R1
EPB41	Erythrocyte Membrane Protein Band 4.1	Protein Coding	P11171	53	GC01P028887	18.4678	https://www.genecards.org/cgi-bin/carddisp.pl?gene=EPB41
ACO1	Aconitase 1	Protein Coding	P21399	50	GC09P032374	18.4678	https://www.genecards.org/cgi-bin/carddisp.pl?gene=ACO1
MAP2K3	Mitogen-Activated Protein Kinase Kinase 3	Protein Coding	P46734	56	GC17P076203	18.4673	https://www.genecards.org/cgi-bin/carddisp.pl?gene=MAP2K3
RICTOR	RPTOR Independent Companion Of MTOR Complex 2	Protein Coding	Q6R327	50	GC05M038937	18.4631	https://www.genecards.org/cgi-bin/carddisp.pl?gene=RICTOR
SH3BP2	SH3 Domain Binding Protein 2	Protein Coding	P78314	48	GC04P002794	18.4625	https://www.genecards.org/cgi-bin/carddisp.pl?gene=SH3BP2
GAST	Gastrin	Protein Coding	P01350	45	GC17P041712	18.4622	https://www.genecards.org/cgi-bin/carddisp.pl?gene=GAST
PIN1	Peptidylprolyl Cis/Trans Isomerase, NIMA-Interacting 1	Protein Coding	Q13526	54	GC19P009835	18.455	https://www.genecards.org/cgi-bin/carddisp.pl?gene=PIN1
HMGCR	3-Hydroxy-3-Methylglutaryl-CoA Reductase	Protein Coding	P04035	53	GC05P075336	18.4516	https://www.genecards.org/cgi-bin/carddisp.pl?gene=HMGCR
FANCL	FA Complementation Group L	Protein Coding	Q9NW38	53	GC02M058127	18.4487	https://www.genecards.org/cgi-bin/carddisp.pl?gene=FANCL
PPP3CB	Protein Phosphatase 3 Catalytic Subunit Beta	Protein Coding	P16298	50	GC10M073436	18.4473	https://www.genecards.org/cgi-bin/carddisp.pl?gene=PPP3CB
HOXA10	Homeobox A10	Protein Coding	P31260	47	GC07M027812	18.4439	https://www.genecards.org/cgi-bin/carddisp.pl?gene=HOXA10
NR2C2AP	Nuclear Receptor 2C2 Associated Protein	Protein Coding	Q86WQ0	39	GC19M019201	18.4325	https://www.genecards.org/cgi-bin/carddisp.pl?gene=NR2C2AP
TREX1	Three Prime Repair Exonuclease 1	Protein Coding	Q9NSU2	48	GC03P051558	18.417	https://www.genecards.org/cgi-bin/carddisp.pl?gene=TREX1
PDCD6	Programmed Cell Death 6	Protein Coding	O75340	45	GC05P000272	18.4148	https://www.genecards.org/cgi-bin/carddisp.pl?gene=PDCD6
ATXN2	Ataxin 2	Protein Coding	Q99700	50	GC12M111443	18.4134	https://www.genecards.org/cgi-bin/carddisp.pl?gene=ATXN2
PSEN2	Presenilin 2	Protein Coding	P49810	56	GC01P226870	18.3814	https://www.genecards.org/cgi-bin/carddisp.pl?gene=PSEN2
PROX1	Prospero Homeobox 1	Protein Coding	Q92786	50	GC01P213983	18.3803	https://www.genecards.org/cgi-bin/carddisp.pl?gene=PROX1
CD101	CD101 Molecule	Protein Coding	Q93033	47	GC01P117001	18.3793	https://www.genecards.org/cgi-bin/carddisp.pl?gene=CD101
ATRIP	ATR Interacting Protein	Protein Coding	Q8WXE1	49	GC03P051553	18.3738	https://www.genecards.org/cgi-bin/carddisp.pl?gene=ATRIP
RFX2	Regulatory Factor X2	Protein Coding	P48378	48	GC19M005993	18.3715	https://www.genecards.org/cgi-bin/carddisp.pl?gene=RFX2
SS18	SS18 Subunit Of BAF Chromatin Remodeling Complex	Protein Coding	Q15532	47	GC18M026016	18.3491	https://www.genecards.org/cgi-bin/carddisp.pl?gene=SS18
RHOB	Ras Homolog Family Member B	Protein Coding	P62745	51	GC02P020447	18.3359	https://www.genecards.org/cgi-bin/carddisp.pl?gene=RHOB
RGCC	Regulator Of Cell Cycle	Protein Coding	Q9H4X1	42	GC13P041457	18.317	https://www.genecards.org/cgi-bin/carddisp.pl?gene=RGCC
FUT4	Fucosyltransferase 4	Protein Coding	P22083	45	GC11P094544	18.2978	https://www.genecards.org/cgi-bin/carddisp.pl?gene=FUT4
KIF1B	Kinesin Family Member 1B	Protein Coding	O60333	50	GC01P010210	18.2956	https://www.genecards.org/cgi-bin/carddisp.pl?gene=KIF1B
FZR1	Fizzy And Cell Division Cycle 20 Related 1	Protein Coding	Q9UM11	51	GC19P003506	18.292	https://www.genecards.org/cgi-bin/carddisp.pl?gene=FZR1
PDCD6IP	Programmed Cell Death 6 Interacting Protein	Protein Coding	Q8WUM4	50	GC03P033798	18.2882	https://www.genecards.org/cgi-bin/carddisp.pl?gene=PDCD6IP
SCARB1	Scavenger Receptor Class B Member 1	Protein Coding	Q8WTV0	54	GC12M124776	18.2842	https://www.genecards.org/cgi-bin/carddisp.pl?gene=SCARB1
PPP1R13L	Protein Phosphatase 1 Regulatory Subunit 13 Like	Protein Coding	Q8WUF5	48	GC19M045379	18.2819	https://www.genecards.org/cgi-bin/carddisp.pl?gene=PPP1R13L
RPS6KA5	Ribosomal Protein S6 Kinase A5	Protein Coding	O75582	53	GC14M090847	18.2811	https://www.genecards.org/cgi-bin/carddisp.pl?gene=RPS6KA5
BTG2	BTG Anti-Proliferation Factor 2	Protein Coding	P78543	45	GC01P203305	18.2655	https://www.genecards.org/cgi-bin/carddisp.pl?gene=BTG2
IFNAR1	Interferon Alpha And Beta Receptor Subunit 1	Protein Coding	P17181	55	GC21P033324	18.2612	https://www.genecards.org/cgi-bin/carddisp.pl?gene=IFNAR1
ACKR2	Atypical Chemokine Receptor 2	Protein Coding	O00590	46	GC03P042804	18.2502	https://www.genecards.org/cgi-bin/carddisp.pl?gene=ACKR2
MYBPC3	Myosin Binding Protein C3	Protein Coding	Q14896	53	GC11M108877	18.2378	https://www.genecards.org/cgi-bin/carddisp.pl?gene=MYBPC3
MATK	Megakaryocyte-Associated Tyrosine Kinase	Protein Coding	P42679	50	GC19M003777	18.2285	https://www.genecards.org/cgi-bin/carddisp.pl?gene=MATK
PSMC3	Proteasome 26S Subunit, ATPase 3	Protein Coding	P17980	50	GC11M108879	18.2261	https://www.genecards.org/cgi-bin/carddisp.pl?gene=PSMC3
PON1	Paraoxonase 1	Protein Coding	P27169	54	GC07M095297	18.2257	https://www.genecards.org/cgi-bin/carddisp.pl?gene=PON1
SKIC2	SKI2 Subunit Of Superkiller Complex	Protein Coding	Q15477	49	GC06P111654	18.2226	https://www.genecards.org/cgi-bin/carddisp.pl?gene=SKIC2
NCR3	Natural Cytotoxicity Triggering Receptor 3	Protein Coding	O14931	46	GC06M031588	18.216	https://www.genecards.org/cgi-bin/carddisp.pl?gene=NCR3
CYP11A1	Cytochrome P450 Family 11 Subfamily A Member 1	Protein Coding	P05108	54	GC15M074337	18.2156	https://www.genecards.org/cgi-bin/carddisp.pl?gene=CYP11A1
MAP2	Microtubule Associated Protein 2	Protein Coding	P11137	50	GC02P209424	18.2137	https://www.genecards.org/cgi-bin/carddisp.pl?gene=MAP2
GAD1	Glutamate Decarboxylase 1	Protein Coding	Q99259	56	GC02P170813	18.2093	https://www.genecards.org/cgi-bin/carddisp.pl?gene=GAD1
PEG10	Paternally Expressed 10	Protein Coding	Q86TG7	46	GC07P094656	18.1954	https://www.genecards.org/cgi-bin/carddisp.pl?gene=PEG10
REST	RE1 Silencing Transcription Factor	Protein Coding	Q13127	50	GC04P056907	18.1933	https://www.genecards.org/cgi-bin/carddisp.pl?gene=REST
LIPA	Lipase A, Lysosomal Acid Type	Protein Coding	P38571	56	GC10M089213	18.1854	https://www.genecards.org/cgi-bin/carddisp.pl?gene=LIPA
BBC3	BCL2 Binding Component 3	Protein Coding	Q96PG8	46	GC19M047220	18.1766	https://www.genecards.org/cgi-bin/carddisp.pl?gene=BBC3
GIMAP5	GTPase, IMAP Family Member 5	Protein Coding	Q96F15	44	GC07P150722	18.175	https://www.genecards.org/cgi-bin/carddisp.pl?gene=GIMAP5
NBAS	NBAS Subunit Of NRZ Tethering Complex	Protein Coding	A2RRP1	47	GC02M014794	18.1714	https://www.genecards.org/cgi-bin/carddisp.pl?gene=NBAS
PPP1R3A	Protein Phosphatase 1 Regulatory Subunit 3A	Protein Coding	Q16821	49	GC07M113876	18.1601	https://www.genecards.org/cgi-bin/carddisp.pl?gene=PPP1R3A
GRIN2B	Glutamate Ionotropic Receptor NMDA Type Subunit 2B	Protein Coding	Q13224	59	GC12M013437	18.1491	https://www.genecards.org/cgi-bin/carddisp.pl?gene=GRIN2B
PATZ1	POZ/BTB And AT Hook Containing Zinc Finger 1	Protein Coding	Q9HBE1	46	GC22M031325	18.1334	https://www.genecards.org/cgi-bin/carddisp.pl?gene=PATZ1
CASK	Calcium/Calmodulin Dependent Serine Protein Kinase	Protein Coding	O14936	57	GC0XM041514	18.1275	https://www.genecards.org/cgi-bin/carddisp.pl?gene=CASK
MAD1L1	Mitotic Arrest Deficient 1 Like 1	Protein Coding	Q9Y6D9	53	GC07M001815	18.1192	https://www.genecards.org/cgi-bin/carddisp.pl?gene=MAD1L1
ACTG2	Actin Gamma 2, Smooth Muscle	Protein Coding	P63267	51	GC02P073892	18.1187	https://www.genecards.org/cgi-bin/carddisp.pl?gene=ACTG2
NPHS1	NPHS1 Adhesion Molecule, Nephrin	Protein Coding	O60500	54	GC19M035825	18.116	https://www.genecards.org/cgi-bin/carddisp.pl?gene=NPHS1
PLA2G4A	Phospholipase A2 Group IVA	Protein Coding	P47712	54	GC01P186798	18.1096	https://www.genecards.org/cgi-bin/carddisp.pl?gene=PLA2G4A
KRT20	Keratin 20	Protein Coding	P35900	46	GC17M040875	18.1003	https://www.genecards.org/cgi-bin/carddisp.pl?gene=KRT20
TREML1	Triggering Receptor Expressed On Myeloid Cells Like 1	Protein Coding	Q86YW5	42	GC06M081111	18.0979	https://www.genecards.org/cgi-bin/carddisp.pl?gene=TREML1
FOXA1	Forkhead Box A1	Protein Coding	P55317	50	GC14M037589	18.0961	https://www.genecards.org/cgi-bin/carddisp.pl?gene=FOXA1
PARK7	Parkinsonism Associated Deglycase	Protein Coding	Q99497	54	GC01P008210	18.0872	https://www.genecards.org/cgi-bin/carddisp.pl?gene=PARK7
SOX11	SRY-Box Transcription Factor 11	Protein Coding	P35716	48	GC02P005707	18.079	https://www.genecards.org/cgi-bin/carddisp.pl?gene=SOX11
TMC8	Transmembrane Channel Like 8	Protein Coding	Q8IU68	48	GC17P078130	18.0778	https://www.genecards.org/cgi-bin/carddisp.pl?gene=TMC8
UCP3	Uncoupling Protein 3	Protein Coding	P55916	49	GC11M074000	18.0766	https://www.genecards.org/cgi-bin/carddisp.pl?gene=UCP3
CDC14A	Cell Division Cycle 14A	Protein Coding	Q9UNH5	48	GC01P100351	18.0716	https://www.genecards.org/cgi-bin/carddisp.pl?gene=CDC14A
PPP3R2	Protein Phosphatase 3 Regulatory Subunit B, Beta	Protein Coding	Q96LZ3	45	GC09M101591	18.064	https://www.genecards.org/cgi-bin/carddisp.pl?gene=PPP3R2
CRLF2	Cytokine Receptor Like Factor 2	Protein Coding	Q9HC73	45	GC0XM001190	18.0636	https://www.genecards.org/cgi-bin/carddisp.pl?gene=CRLF2
GPR183	G Protein-Coupled Receptor 183	Protein Coding	P32249	45	GC13M099398	18.0628	https://www.genecards.org/cgi-bin/carddisp.pl?gene=GPR183
PPP6R1	Protein Phosphatase 6 Regulatory Subunit 1	Protein Coding	Q9UPN7	43	GC19M080166	18.0627	https://www.genecards.org/cgi-bin/carddisp.pl?gene=PPP6R1
EPHA5	EPH Receptor A5	Protein Coding	P54756	53	GC04M065319	18.0607	https://www.genecards.org/cgi-bin/carddisp.pl?gene=EPHA5
DROSHA	Drosha Ribonuclease III	Protein Coding	Q9NRR4	50	GC05M031401	18.0597	https://www.genecards.org/cgi-bin/carddisp.pl?gene=DROSHA
RPS28	Ribosomal Protein S28	Protein Coding	P62857	46	GC19P008492	18.0574	https://www.genecards.org/cgi-bin/carddisp.pl?gene=RPS28
DLGAP2	DLG Associated Protein 2	Protein Coding	Q9P1A6	44	GC08P000739	18.0502	https://www.genecards.org/cgi-bin/carddisp.pl?gene=DLGAP2
PRKAA2	Protein Kinase AMP-Activated Catalytic Subunit Alpha 2	Protein Coding	P54646	57	GC01P056645	18.0475	https://www.genecards.org/cgi-bin/carddisp.pl?gene=PRKAA2
RBBP4	RB Binding Protein 4, Chromatin Remodeling Factor	Protein Coding	Q09028	51	GC01P032651	18.0469	https://www.genecards.org/cgi-bin/carddisp.pl?gene=RBBP4
KCNT1	Potassium Sodium-Activated Channel Subfamily T Member 1	Protein Coding	Q5JUK3	49	GC09P135702	18.0434	https://www.genecards.org/cgi-bin/carddisp.pl?gene=KCNT1
ABCC3	ATP Binding Cassette Subfamily C Member 3	Protein Coding	O15438	52	GC17P050634	18.0355	https://www.genecards.org/cgi-bin/carddisp.pl?gene=ABCC3
ARF6	ADP Ribosylation Factor 6	Protein Coding	P62330	49	GC14P049895	18.0345	https://www.genecards.org/cgi-bin/carddisp.pl?gene=ARF6
TLN1	Talin 1	Protein Coding	Q9Y490	49	GC09M035696	18.0319	https://www.genecards.org/cgi-bin/carddisp.pl?gene=TLN1
MAPK12	Mitogen-Activated Protein Kinase 12	Protein Coding	P53778	54	GC22M068329	18.0254	https://www.genecards.org/cgi-bin/carddisp.pl?gene=MAPK12
USP44	Ubiquitin Specific Peptidase 44	Protein Coding	Q9H0E7	44	GC12M095516	18.024	https://www.genecards.org/cgi-bin/carddisp.pl?gene=USP44
HPSE	Heparanase	Protein Coding	Q9Y251	51	GC04M083292	18.0196	https://www.genecards.org/cgi-bin/carddisp.pl?gene=HPSE
ADAMTS13	ADAM Metallopeptidase With Thrombospondin Type 1 Motif 13	Protein Coding	Q76LX8	54	GC09P133414	18.0182	https://www.genecards.org/cgi-bin/carddisp.pl?gene=ADAMTS13
FANCE	FA Complementation Group E	Protein Coding	Q9HB96	49	GC06P104222	18.0127	https://www.genecards.org/cgi-bin/carddisp.pl?gene=FANCE
RB1CC1	RB1 Inducible Coiled-Coil 1	Protein Coding	Q8TDY2	50	GC08M052622	18.0116	https://www.genecards.org/cgi-bin/carddisp.pl?gene=RB1CC1
USP8	Ubiquitin Specific Peptidase 8	Protein Coding	P40818	53	GC15P050424	18.0032	https://www.genecards.org/cgi-bin/carddisp.pl?gene=USP8
GSK3A	Glycogen Synthase Kinase 3 Alpha	Protein Coding	P49840	56	GC19M079626	18.0012	https://www.genecards.org/cgi-bin/carddisp.pl?gene=GSK3A
SAMD9	Sterile Alpha Motif Domain Containing 9	Protein Coding	Q5K651	42	GC07M093099	17.9947	https://www.genecards.org/cgi-bin/carddisp.pl?gene=SAMD9
PSMA7	Proteasome 20S Subunit Alpha 7	Protein Coding	O14818	51	GC20M062136	17.9929	https://www.genecards.org/cgi-bin/carddisp.pl?gene=PSMA7
PLP1	Proteolipid Protein 1	Protein Coding	P60201	50	GC0XP103773	17.9914	https://www.genecards.org/cgi-bin/carddisp.pl?gene=PLP1
DDX5	DEAD-Box Helicase 5	Protein Coding	P17844	52	GC17M064498	17.9894	https://www.genecards.org/cgi-bin/carddisp.pl?gene=DDX5
RPL15	Ribosomal Protein L15	Protein Coding	P61313	51	GC03P023916	17.9892	https://www.genecards.org/cgi-bin/carddisp.pl?gene=RPL15
CFI	Complement Factor I	Protein Coding	P05156	54	GC04M109732	17.9816	https://www.genecards.org/cgi-bin/carddisp.pl?gene=CFI
RXRB	Retinoid X Receptor Beta	Protein Coding	P28702	53	GC06M033193	17.9808	https://www.genecards.org/cgi-bin/carddisp.pl?gene=RXRB
MED1	Mediator Complex Subunit 1	Protein Coding	Q15648	49	GC17M039404	17.9807	https://www.genecards.org/cgi-bin/carddisp.pl?gene=MED1
PTGDR2	Prostaglandin D2 Receptor 2	Protein Coding	Q9Y5Y4	50	GC11M060850	17.9745	https://www.genecards.org/cgi-bin/carddisp.pl?gene=PTGDR2
DDR1	Discoidin Domain Receptor Tyrosine Kinase 1	Protein Coding	Q08345	53	GC06P104081	17.9665	https://www.genecards.org/cgi-bin/carddisp.pl?gene=DDR1
SPHK1	Sphingosine Kinase 1	Protein Coding	Q9NYA1	52	GC17P076376	17.962	https://www.genecards.org/cgi-bin/carddisp.pl?gene=SPHK1
ZFP36	ZFP36 Ring Finger Protein	Protein Coding	P26651	45	GC19P039406	17.9604	https://www.genecards.org/cgi-bin/carddisp.pl?gene=ZFP36
ASCL1	Achaete-Scute Family BHLH Transcription Factor 1	Protein Coding	P50553	49	GC12P102957	17.9597	https://www.genecards.org/cgi-bin/carddisp.pl?gene=ASCL1
RETN	Resistin	Protein Coding	Q9HD89	49	GC19P007669	17.9582	https://www.genecards.org/cgi-bin/carddisp.pl?gene=RETN
RRM1	Ribonucleotide Reductase Catalytic Subunit M1	Protein Coding	P23921	56	GC11P004118	17.9545	https://www.genecards.org/cgi-bin/carddisp.pl?gene=RRM1
IQGAP1	IQ Motif Containing GTPase Activating Protein 1	Protein Coding	P46940	50	GC15P090388	17.9506	https://www.genecards.org/cgi-bin/carddisp.pl?gene=IQGAP1
MEF2D	Myocyte Enhancer Factor 2D	Protein Coding	Q14814	52	GC01M156463	17.9262	https://www.genecards.org/cgi-bin/carddisp.pl?gene=MEF2D
ALDH1A1	Aldehyde Dehydrogenase 1 Family Member A1	Protein Coding	P00352	54	GC09M072900	17.9167	https://www.genecards.org/cgi-bin/carddisp.pl?gene=ALDH1A1
PTPRN	Protein Tyrosine Phosphatase Receptor Type N	Protein Coding	Q16849	51	GC02M219289	17.9121	https://www.genecards.org/cgi-bin/carddisp.pl?gene=PTPRN
IL32	Interleukin 32	Protein Coding	P24001	45	GC16P045978	17.9068	https://www.genecards.org/cgi-bin/carddisp.pl?gene=IL32
POU2F2	POU Class 2 Homeobox 2	Protein Coding	P09086	48	GC19M042086	17.9022	https://www.genecards.org/cgi-bin/carddisp.pl?gene=POU2F2
PSMC5	Proteasome 26S Subunit, ATPase 5	Protein Coding	P62195	48	GC17P063827	17.8903	https://www.genecards.org/cgi-bin/carddisp.pl?gene=PSMC5
MAP3K11	Mitogen-Activated Protein Kinase Kinase Kinase 11	Protein Coding	Q16584	53	GC11M109244	17.8893	https://www.genecards.org/cgi-bin/carddisp.pl?gene=MAP3K11
RPS6KA3	Ribosomal Protein S6 Kinase A3	Protein Coding	P51812	60	GC0XM020149	17.8882	https://www.genecards.org/cgi-bin/carddisp.pl?gene=RPS6KA3
IGFBP1	Insulin Like Growth Factor Binding Protein 1	Protein Coding	P08833	50	GC07P048599	17.8859	https://www.genecards.org/cgi-bin/carddisp.pl?gene=IGFBP1
HLA-DQB2	Major Histocompatibility Complex, Class II, DQ Beta 2	Protein Coding	P05538	44	GC06M032756	17.881	https://www.genecards.org/cgi-bin/carddisp.pl?gene=HLA-DQB2
PDCD5	Programmed Cell Death 5	Protein Coding	O14737	46	GC19P032581	17.8797	https://www.genecards.org/cgi-bin/carddisp.pl?gene=PDCD5
HMMR	Hyaluronan Mediated Motility Receptor	Protein Coding	O75330	50	GC05P163480	17.8772	https://www.genecards.org/cgi-bin/carddisp.pl?gene=HMMR
PTBP1	Polypyrimidine Tract Binding Protein 1	Protein Coding	P26599	49	GC19P000797	17.8762	https://www.genecards.org/cgi-bin/carddisp.pl?gene=PTBP1
CCN1	Cellular Communication Network Factor 1	Protein Coding	O00622	47	GC01P085585	17.8738	https://www.genecards.org/cgi-bin/carddisp.pl?gene=CCN1
UPF1	UPF1 RNA Helicase And ATPase	Protein Coding	Q92900	48	GC19P018831	17.8725	https://www.genecards.org/cgi-bin/carddisp.pl?gene=UPF1
CFL1	Cofilin 1	Protein Coding	P23528	53	GC11M065823	17.8654	https://www.genecards.org/cgi-bin/carddisp.pl?gene=CFL1
MYL9	Myosin Light Chain 9	Protein Coding	P24844	50	GC20P036541	17.851	https://www.genecards.org/cgi-bin/carddisp.pl?gene=MYL9
ID3	Inhibitor Of DNA Binding 3	Protein Coding	Q02535	46	GC01M023557	17.8379	https://www.genecards.org/cgi-bin/carddisp.pl?gene=ID3
NME2	NME/NM23 Nucleoside Diphosphate Kinase 2	Protein Coding	P22392	52	GC17P051165	17.8316	https://www.genecards.org/cgi-bin/carddisp.pl?gene=NME2
CCT8	Chaperonin Containing TCP1 Subunit 8	Protein Coding	P50990	47	GC21M029055	17.8292	https://www.genecards.org/cgi-bin/carddisp.pl?gene=CCT8
MTR	5-Methyltetrahydrofolate-Homocysteine Methyltransferase	Protein Coding	Q99707	54	GC01P236795	17.8286	https://www.genecards.org/cgi-bin/carddisp.pl?gene=MTR
MYH6	Myosin Heavy Chain 6	Protein Coding	P13533	53	GC14M023381	17.8238	https://www.genecards.org/cgi-bin/carddisp.pl?gene=MYH6
PSMD1	Proteasome 26S Subunit, Non-ATPase 1	Protein Coding	Q99460	47	GC02P231056	17.8227	https://www.genecards.org/cgi-bin/carddisp.pl?gene=PSMD1
GFRA1	GDNF Family Receptor Alpha 1	Protein Coding	P56159	54	GC10M116056	17.8203	https://www.genecards.org/cgi-bin/carddisp.pl?gene=GFRA1
INHBA	Inhibin Subunit Beta A	Protein Coding	P08476	52	GC07M041670	17.8086	https://www.genecards.org/cgi-bin/carddisp.pl?gene=INHBA
TRDN	Triadin	Protein Coding	Q13061	49	GC06M123198	17.8072	https://www.genecards.org/cgi-bin/carddisp.pl?gene=TRDN
POLR2L	RNA Polymerase II, I And III Subunit L	Protein Coding	P62875	46	GC11M007974	17.8035	https://www.genecards.org/cgi-bin/carddisp.pl?gene=POLR2L
CLDND1	Claudin Domain Containing 1	Protein Coding	Q9NY35	45	GC03M098497	17.8009	https://www.genecards.org/cgi-bin/carddisp.pl?gene=CLDND1
RPS6	Ribosomal Protein S6	Protein Coding	P62753	50	GC09M019375	17.7966	https://www.genecards.org/cgi-bin/carddisp.pl?gene=RPS6
MIA2	MIA SH3 Domain ER Export Factor 2	Protein Coding	Q96PC5	46	GC14P039230	17.795	https://www.genecards.org/cgi-bin/carddisp.pl?gene=MIA2
BCL9	BCL9 Transcription Coactivator	Protein Coding	O00512	48	GC01P147541	17.7883	https://www.genecards.org/cgi-bin/carddisp.pl?gene=BCL9
SLC7A5	Solute Carrier Family 7 Member 5	Protein Coding	Q01650	51	GC16M087830	17.7832	https://www.genecards.org/cgi-bin/carddisp.pl?gene=SLC7A5
LAMA5	Laminin Subunit Alpha 5	Protein Coding	O15230	50	GC20M062307	17.7721	https://www.genecards.org/cgi-bin/carddisp.pl?gene=LAMA5
RPS15A	Ribosomal Protein S15a	Protein Coding	P62244	50	GC16M018781	17.7675	https://www.genecards.org/cgi-bin/carddisp.pl?gene=RPS15A
ALDOA	Aldolase, Fructose-Bisphosphate A	Protein Coding	P04075	55	GC16P030064	17.7631	https://www.genecards.org/cgi-bin/carddisp.pl?gene=ALDOA
PHLDA1	Pleckstrin Homology Like Domain Family A Member 1	Protein Coding	Q8WV24	42	GC12M076025	17.7616	https://www.genecards.org/cgi-bin/carddisp.pl?gene=PHLDA1
GAL	Galanin And GMAP Prepropeptide	Protein Coding	P22466	51	GC11P073118	17.7599	https://www.genecards.org/cgi-bin/carddisp.pl?gene=GAL
DUSP22	Dual Specificity Phosphatase 22	Protein Coding	Q9NRW4	43	GC06P000430	17.7443	https://www.genecards.org/cgi-bin/carddisp.pl?gene=DUSP22
LOX	Lysyl Oxidase	Protein Coding	P28300	54	GC05M122063	17.7435	https://www.genecards.org/cgi-bin/carddisp.pl?gene=LOX
PPP1CA	Protein Phosphatase 1 Catalytic Subunit Alpha	Protein Coding	P62136	53	GC11M109346	17.742	https://www.genecards.org/cgi-bin/carddisp.pl?gene=PPP1CA
ATG7	Autophagy Related 7	Protein Coding	O95352	50	GC03P014641	17.7402	https://www.genecards.org/cgi-bin/carddisp.pl?gene=ATG7
TRAJ56	T Cell Receptor Alpha Joining 56	Protein Coding		11	GC14P038385	17.7399	https://www.genecards.org/cgi-bin/carddisp.pl?gene=TRAJ56
TNFSF13	TNF Superfamily Member 13	Protein Coding	O75888	52	GC17P007558	17.7329	https://www.genecards.org/cgi-bin/carddisp.pl?gene=TNFSF13
AIF1	Allograft Inflammatory Factor 1	Protein Coding	P55008	45	GC06P104097	17.7291	https://www.genecards.org/cgi-bin/carddisp.pl?gene=AIF1
CDC16	Cell Division Cycle 16	Protein Coding	Q13042	46	GC13P114234	17.7211	https://www.genecards.org/cgi-bin/carddisp.pl?gene=CDC16
EBI3	Epstein-Barr Virus Induced 3	Protein Coding	Q14213	45	GC19P006140	17.7131	https://www.genecards.org/cgi-bin/carddisp.pl?gene=EBI3
STOML2	Stomatin Like 2	Protein Coding	Q9UJZ1	45	GC09M035099	17.7116	https://www.genecards.org/cgi-bin/carddisp.pl?gene=STOML2
SLC22A18	Solute Carrier Family 22 Member 18	Protein Coding	Q96BI1	50	GC11P002899	17.7003	https://www.genecards.org/cgi-bin/carddisp.pl?gene=SLC22A18
IGLL1	Immunoglobulin Lambda Like Polypeptide 1	Protein Coding	P15814	50	GC22M023573	17.6966	https://www.genecards.org/cgi-bin/carddisp.pl?gene=IGLL1
TRADD	TNFRSF1A Associated Via Death Domain	Protein Coding	Q15628	50	GC16M067154	17.6958	https://www.genecards.org/cgi-bin/carddisp.pl?gene=TRADD
KCNMA1	Potassium Calcium-Activated Channel Subfamily M Alpha 1	Protein Coding	Q12791	56	GC10M076869	17.6956	https://www.genecards.org/cgi-bin/carddisp.pl?gene=KCNMA1
PSMB4	Proteasome 20S Subunit Beta 4	Protein Coding	P28070	52	GC01P151399	17.6803	https://www.genecards.org/cgi-bin/carddisp.pl?gene=PSMB4
GFI1B	Growth Factor Independent 1B Transcriptional Repressor	Protein Coding	Q5VTD9	47	GC09P132948	17.6778	https://www.genecards.org/cgi-bin/carddisp.pl?gene=GFI1B
WNT4	Wnt Family Member 4	Protein Coding	P56705	54	GC01M022190	17.6738	https://www.genecards.org/cgi-bin/carddisp.pl?gene=WNT4
PSMC1	Proteasome 26S Subunit, ATPase 1	Protein Coding	P62191	50	GC14P090256	17.6606	https://www.genecards.org/cgi-bin/carddisp.pl?gene=PSMC1
HYOU1	Hypoxia Up-Regulated 1	Protein Coding	Q9Y4L1	52	GC11M119400	17.6403	https://www.genecards.org/cgi-bin/carddisp.pl?gene=HYOU1
FHL1	Four And A Half LIM Domains 1	Protein Coding	Q13642	52	GC0XP136146	17.6397	https://www.genecards.org/cgi-bin/carddisp.pl?gene=FHL1
RIPK2	Receptor Interacting Serine/Threonine Kinase 2	Protein Coding	O43353	53	GC08P089852	17.6304	https://www.genecards.org/cgi-bin/carddisp.pl?gene=RIPK2
PTN	Pleiotrophin	Protein Coding	P21246	48	GC07M137227	17.6231	https://www.genecards.org/cgi-bin/carddisp.pl?gene=PTN
TNFSF8	TNF Superfamily Member 8	Protein Coding	P32971	43	GC09M114893	17.62	https://www.genecards.org/cgi-bin/carddisp.pl?gene=TNFSF8
ANG	Angiogenin	Protein Coding	P03950	52	GC14P038248	17.6174	https://www.genecards.org/cgi-bin/carddisp.pl?gene=ANG
FCGR1A	Fc Gamma Receptor Ia	Protein Coding	P12314	48	GC01P154210	17.6092	https://www.genecards.org/cgi-bin/carddisp.pl?gene=FCGR1A
CBS	Cystathionine Beta-Synthase	Protein Coding	P35520	57	GC21M043053	17.6009	https://www.genecards.org/cgi-bin/carddisp.pl?gene=CBS
SELENOT	Selenoprotein T	Protein Coding	P62341	39	GC03P150603	17.6005	https://www.genecards.org/cgi-bin/carddisp.pl?gene=SELENOT
CAD	Carbamoyl-Phosphate Synthetase 2, Aspartate Transcarbamylase, And Dihydroorotase	Protein Coding	P27708	56	GC02P027217	17.5963	https://www.genecards.org/cgi-bin/carddisp.pl?gene=CAD
DDX41	DEAD-Box Helicase 41	Protein Coding	Q9UJV9	51	GC05M177511	17.5944	https://www.genecards.org/cgi-bin/carddisp.pl?gene=DDX41
NOS1	Nitric Oxide Synthase 1	Protein Coding	P29475	56	GC12M117208	17.5908	https://www.genecards.org/cgi-bin/carddisp.pl?gene=NOS1
ABCC4	ATP Binding Cassette Subfamily C Member 4	Protein Coding	O15439	52	GC13M095019	17.5853	https://www.genecards.org/cgi-bin/carddisp.pl?gene=ABCC4
PTPN12	Protein Tyrosine Phosphatase Non-Receptor Type 12	Protein Coding	Q05209	54	GC07P077537	17.5833	https://www.genecards.org/cgi-bin/carddisp.pl?gene=PTPN12
DCTN1	Dynactin Subunit 1	Protein Coding	Q14203	53	GC02M074361	17.5798	https://www.genecards.org/cgi-bin/carddisp.pl?gene=DCTN1
IFT140	Intraflagellar Transport 140	Protein Coding	Q96RY7	48	GC16M010418	17.577	https://www.genecards.org/cgi-bin/carddisp.pl?gene=IFT140
PSMD8	Proteasome 26S Subunit, Non-ATPase 8	Protein Coding	P48556	47	GC19P038374	17.5743	https://www.genecards.org/cgi-bin/carddisp.pl?gene=PSMD8
POT1	Protection Of Telomeres 1	Protein Coding	Q9NUX5	49	GC07M124822	17.5635	https://www.genecards.org/cgi-bin/carddisp.pl?gene=POT1
TUBA1B	Tubulin Alpha 1b	Protein Coding	P68363	50	GC12M049127	17.5624	https://www.genecards.org/cgi-bin/carddisp.pl?gene=TUBA1B
ARHGAP45	Rho GTPase Activating Protein 45	Protein Coding	Q92619	44	GC19P001065	17.5572	https://www.genecards.org/cgi-bin/carddisp.pl?gene=ARHGAP45
FAP	Fibroblast Activation Protein Alpha	Protein Coding	Q12884	53	GC02M162170	17.548	https://www.genecards.org/cgi-bin/carddisp.pl?gene=FAP
TAF1	TATA-Box Binding Protein Associated Factor 1	Protein Coding	P21675	55	GC0XP071366	17.5457	https://www.genecards.org/cgi-bin/carddisp.pl?gene=TAF1
CNR1	Cannabinoid Receptor 1	Protein Coding	P21554	53	GC06M088139	17.5442	https://www.genecards.org/cgi-bin/carddisp.pl?gene=CNR1
NR1H3	Nuclear Receptor Subfamily 1 Group H Member 3	Protein Coding	Q13133	53	GC11P047248	17.544	https://www.genecards.org/cgi-bin/carddisp.pl?gene=NR1H3
AKAP8	A-Kinase Anchoring Protein 8	Protein Coding	O43823	45	GC19M015662	17.542	https://www.genecards.org/cgi-bin/carddisp.pl?gene=AKAP8
HSP90AB1	Heat Shock Protein 90 Alpha Family Class B Member 1	Protein Coding	P08238	56	GC06P044246	17.5403	https://www.genecards.org/cgi-bin/carddisp.pl?gene=HSP90AB1
ABCA4	ATP Binding Cassette Subfamily A Member 4	Protein Coding	P78363	51	GC01M093992	17.5366	https://www.genecards.org/cgi-bin/carddisp.pl?gene=ABCA4
IRF2BP1	Interferon Regulatory Factor 2 Binding Protein 1	Protein Coding	Q8IU81	41	GC19M079742	17.5362	https://www.genecards.org/cgi-bin/carddisp.pl?gene=IRF2BP1
TNFSF15	TNF Superfamily Member 15	Protein Coding	O95150	51	GC09M114784	17.5268	https://www.genecards.org/cgi-bin/carddisp.pl?gene=TNFSF15
DGKZ	Diacylglycerol Kinase Zeta	Protein Coding	Q13574	48	GC11P046332	17.5247	https://www.genecards.org/cgi-bin/carddisp.pl?gene=DGKZ
ZMYND8	Zinc Finger MYND-Type Containing 8	Protein Coding	Q9ULU4	47	GC20M047209	17.5204	https://www.genecards.org/cgi-bin/carddisp.pl?gene=ZMYND8
TPM1	Tropomyosin 1	Protein Coding	P09493	56	GC15P137123	17.5044	https://www.genecards.org/cgi-bin/carddisp.pl?gene=TPM1
HNRNPL	Heterogeneous Nuclear Ribonucleoprotein L	Protein Coding	P14866	47	GC19M038836	17.5009	https://www.genecards.org/cgi-bin/carddisp.pl?gene=HNRNPL
RPL31	Ribosomal Protein L31	Protein Coding	P62899	48	GC02P101003	17.4991	https://www.genecards.org/cgi-bin/carddisp.pl?gene=RPL31
[truncated: 3,848 more rows]
